# Supplementary material for: Metabolic, mitochondrial, renal and hepatic safety of enfuvirtide and raltegravir antiretroviral administration: Randomized crossover clinical trial in healthy volunteers
Source: PubMed Central journal article supplement (PMC6532851; doi:10.1371/journal.pone.0216712), 2019-05-23

```

GET
FILE='/Users/SergioBarroso/Desktop/T20-RAL Reviewers/Base de datos/T20.sav'.
DATASET NAME Conjunto_de_datos1 WINDOW=FRONT.
DESCRIPTIVES VARIABLES=CHOL.PRE.P CHOL.POST.P CHOL.PRE.T20 CHOL.POST.T20 HDL.PRE.P HDL.POST.P I
PRO.POST.P PRO.PRE.T20 PROT.POST.T20
/STATISTICS=MEAN STDDEV SEMEAN.

```

## Descriptivos

### Notas

|                                             |                                                                                                                                                                                                                                                                                                                                                                                                                                                                                                                                                                                                                                                                                                     |                                                                               |
|---------------------------------------------|-----------------------------------------------------------------------------------------------------------------------------------------------------------------------------------------------------------------------------------------------------------------------------------------------------------------------------------------------------------------------------------------------------------------------------------------------------------------------------------------------------------------------------------------------------------------------------------------------------------------------------------------------------------------------------------------------------|-------------------------------------------------------------------------------|
| <b>Resultados creados</b>                   | 29-MAR-2019 00:32:43                                                                                                                                                                                                                                                                                                                                                                                                                                                                                                                                                                                                                                                                                |                                                                               |
| <b>Comentarios</b>                          |                                                                                                                                                                                                                                                                                                                                                                                                                                                                                                                                                                                                                                                                                                     |                                                                               |
| <b>Entrada</b>                              | <b>Datos</b>                                                                                                                                                                                                                                                                                                                                                                                                                                                                                                                                                                                                                                                                                        | /Users/SergioBarroso/Desktop/T20-RAL Reviewers/Base de datos/T20.sav          |
|                                             | <b>Conjunto de datos activo</b>                                                                                                                                                                                                                                                                                                                                                                                                                                                                                                                                                                                                                                                                     | Conjunto_de_datos1                                                            |
|                                             | <b>Filtro</b>                                                                                                                                                                                                                                                                                                                                                                                                                                                                                                                                                                                                                                                                                       | <ninguno>                                                                     |
|                                             | <b>Peso</b>                                                                                                                                                                                                                                                                                                                                                                                                                                                                                                                                                                                                                                                                                         | <ninguno>                                                                     |
|                                             | <b>Dividir archivo</b>                                                                                                                                                                                                                                                                                                                                                                                                                                                                                                                                                                                                                                                                              | <ninguno>                                                                     |
|                                             | <b>Núm. de filas del archivo de trabajo</b>                                                                                                                                                                                                                                                                                                                                                                                                                                                                                                                                                                                                                                                         | 12                                                                            |
| <b>Manipulación de los valores perdidos</b> | <b>Definición de los perdidos</b>                                                                                                                                                                                                                                                                                                                                                                                                                                                                                                                                                                                                                                                                   | Los valores perdidos definidos por el usuario son considerados como perdidos. |
|                                             | <b>Casos utilizados</b>                                                                                                                                                                                                                                                                                                                                                                                                                                                                                                                                                                                                                                                                             | Se han utilizado todos los datos no perdidos.                                 |
| <b>Sintaxis</b>                             | DESCRIPTIVES<br>VARIABLES=CHOL.PRE.P<br>CHOL.POST.P CHOL.PRE.<br>T20 CHOL.POST.T20<br>HDL.PRE.P HDL.POST.P<br>HDL.PRE.T20 HDL.POST.<br>T20 LDL.PRE.P LDL.<br>POST.P LDL.PRE.T20<br>LDL.POST.T20 TAG.PRE.<br>P TAG.POST.P TAG.PRE.<br>T20 TAG.POST.T20 GLU.<br>PRE.P GLU.POST.P GLU.<br>PRE.T20 GLU.POST.T20<br>mtDNA.PRE.P mtDNA.<br>POST.P mtDNA.PRE.T20<br>mtDNA.POST.T20 CRT.<br>PRE.P CRT.POST.P CRT.<br>PRE.T20 CRT.POST.T20<br>AST.PRE.P AST.POST.P<br>AST.PRE.T20 AST.POST.<br>T20 ALT.PRE.P ALT.<br>POST.P ALT.PRE.T20<br>ALT.POST.T20 BIL.PRE.P<br>BIL.POST.P BIL.PRE.T20<br>BIL.POST.T20 PROT.PRE.<br>P<br>PRO.POST.P PRO.PRE.<br>T20 PROT.POST.T20<br>/STATISTICS=MEAN<br>STDDEV SEMEAN. |                                                                               |
| <b>Recursos</b>                             | <b>Tiempo de procesador</b>                                                                                                                                                                                                                                                                                                                                                                                                                                                                                                                                                                                                                                                                         | 00:00:00.01                                                                   |
|                                             | <b>Tiempo transcurrido</b>                                                                                                                                                                                                                                                                                                                                                                                                                                                                                                                                                                                                                                                                          | 00:00:00.00                                                                   |

[Conjunto\_de\_datos1] /Users/SergioBarroso/Desktop/T20-RAL Reviewers/Base de datos/T20.sav

Estadísticos descriptivos

|                        | N           | Media       |              | Desv. típ.  |
|------------------------|-------------|-------------|--------------|-------------|
|                        | Estadístico | Estadístico | Error típico | Estadístico |
| CHOL.PRE.P             | 12          | 181.8333    | 10.94327     | 37.90858    |
| CHOL.POST.P            | 12          | 173.1667    | 11.55542     | 40.02916    |
| CHOL.PRE.T20           | 12          | 183.9167    | 13.45951     | 46.62512    |
| CHOL.POST.T20          | 12          | 172.4167    | 10.12756     | 35.08291    |
| HDL.PRE.P              | 11          | 50.4545     | 2.83601      | 9.40599     |
| HDL.POST.P             | 12          | 48.0833     | 2.61829      | 9.07001     |
| HDL.PRE.T20            | 12          | 48.2500     | 2.20236      | 7.62919     |
| HDL.POST.T20           | 12          | 49.4167     | 2.59504      | 8.98947     |
| LDL.PRE.P              | 11          | 110.6364    | 7.56700      | 25.09690    |
| LDL.POST.P             | 12          | 108.0000    | 8.92647      | 30.92219    |
| LDL.PRE.T20            | 12          | 118.3333    | 11.36337     | 39.36388    |
| LDL.POST.T20           | 12          | 104.4167    | 8.12167      | 28.13428    |
| TAG.PRE.P              | 12          | 85.0833     | 14.64554     | 50.73363    |
| TAG.POST.P             | 12          | 85.2500     | 13.08777     | 45.33737    |
| TAG.PRE.T20            | 12          | 86.6667     | 10.76001     | 37.27376    |
| TAG.POST.T20           | 12          | 92.7500     | 13.80389     | 47.81807    |
| GLU.PRE.P              | 12          | 81.0000     | 2.36130      | 8.17980     |
| GLU.POST.P             | 12          | 82.8333     | 2.40528      | 8.33212     |
| GLU.PRE.T20            | 12          | 82.5000     | 1.97139      | 6.82908     |
| GLU.POST.T20           | 12          | 84.7500     | 1.66572      | 5.77022     |
| mtDNA.PRE.P            | 12          | .7129       | .07962       | .27581      |
| mtDNA.POST.P           | 12          | .6251       | .06851       | .23734      |
| mtDNA.PRE.T20          | 12          | .6203       | .05365       | .18585      |
| mtDNA.POST.T20         | 12          | .6824       | .07028       | .24345      |
| CRT.PRE.P              | 12          | 1.1500      | .02611       | .09045      |
| CRT.POST.P             | 12          | 1.1417      | .02876       | .09962      |
| CRT.PRE.T20            | 11          | 1.1091      | .03426       | .11362      |
| CRT.POST.T20           | 11          | 1.1545      | .02473       | .08202      |
| AST.PRE.P              | 12          | 26.0833     | 2.77832      | 9.62439     |
| AST.POST.P             | 12          | 23.5000     | 1.77312      | 6.14225     |
| AST.PRE.T20            | 11          | 23.4545     | 1.89432      | 6.28273     |
| AST.POST.T20           | 11          | 23.7273     | 1.54385      | 5.12037     |
| ALT.PRE.P              | 12          | 23.3333     | 1.52918      | 5.29723     |
| ALT.POST.P             | 12          | 21.1667     | 1.34183      | 4.64823     |
| ALT.PRE.T20            | 11          | 22.2727     | 2.43494      | 8.07578     |
| ALT.POST.T20           | 11          | 23.6364     | 2.53080      | 8.39372     |
| BIL.PRE.P              | 12          | .9000       | .09692       | .33575      |
| BIL.POST.P             | 12          | .9667       | .15635       | .54160      |
| BIL.PRE.T20            | 11          | .7909       | .04946       | .16404      |
| BIL.POST.T20           | 11          | 1.0727      | .11839       | .39266      |
| PROT.PRE.P             | 12          | 74.5000     | 2.04680      | 7.09033     |
| PRO.POST.P             | 12          | 74.2500     | 1.75432      | 6.07716     |
| PRO.PRE.T20            | 11          | 74.2727     | 1.88820      | 6.26244     |
| PROT.POST.T20          | 11          | 74.9091     | 2.08656      | 6.92033     |
| N válido (según lista) | 11          |             |              |             |

```

GET
FILE='/Users/SergioBarroso/Desktop/T20-RAL Reviewers/Base de datos/T20.sav'.
DATASET NAME Conjunto_de_datos1 WINDOW=FRONT.
DESCRIPTIVES VARIABLES=CHOL.PRE.P CHOL.POST.P CHOL.PRE.T20 CHOL.POST.T20 HDL.PRE.P HDL.POST.P I
PRO.POST.P PRO.PRE.T20 PROT.POST.T20
/STATISTICS=MEAN STDDEV SEMEAN.

```

## Descriptivos

### Notas

|                                             |                                                                                                                                                                                                                                                                                                                                                                                                                                                                                                                                                                                                                                                                                                     |                                                                               |
|---------------------------------------------|-----------------------------------------------------------------------------------------------------------------------------------------------------------------------------------------------------------------------------------------------------------------------------------------------------------------------------------------------------------------------------------------------------------------------------------------------------------------------------------------------------------------------------------------------------------------------------------------------------------------------------------------------------------------------------------------------------|-------------------------------------------------------------------------------|
| <b>Resultados creados</b>                   | 29-MAR-2019 00:32:43                                                                                                                                                                                                                                                                                                                                                                                                                                                                                                                                                                                                                                                                                |                                                                               |
| <b>Comentarios</b>                          |                                                                                                                                                                                                                                                                                                                                                                                                                                                                                                                                                                                                                                                                                                     |                                                                               |
| <b>Entrada</b>                              | <b>Datos</b>                                                                                                                                                                                                                                                                                                                                                                                                                                                                                                                                                                                                                                                                                        | /Users/SergioBarroso/Desktop/T20-RAL Reviewers/Base de datos/T20.sav          |
|                                             | <b>Conjunto de datos activo</b>                                                                                                                                                                                                                                                                                                                                                                                                                                                                                                                                                                                                                                                                     | Conjunto_de_datos1                                                            |
|                                             | <b>Filtro</b>                                                                                                                                                                                                                                                                                                                                                                                                                                                                                                                                                                                                                                                                                       | <ninguno>                                                                     |
|                                             | <b>Peso</b>                                                                                                                                                                                                                                                                                                                                                                                                                                                                                                                                                                                                                                                                                         | <ninguno>                                                                     |
|                                             | <b>Dividir archivo</b>                                                                                                                                                                                                                                                                                                                                                                                                                                                                                                                                                                                                                                                                              | <ninguno>                                                                     |
|                                             | <b>Núm. de filas del archivo de trabajo</b>                                                                                                                                                                                                                                                                                                                                                                                                                                                                                                                                                                                                                                                         | 12                                                                            |
| <b>Manipulación de los valores perdidos</b> | <b>Definición de los perdidos</b>                                                                                                                                                                                                                                                                                                                                                                                                                                                                                                                                                                                                                                                                   | Los valores perdidos definidos por el usuario son considerados como perdidos. |
|                                             | <b>Casos utilizados</b>                                                                                                                                                                                                                                                                                                                                                                                                                                                                                                                                                                                                                                                                             | Se han utilizado todos los datos no perdidos.                                 |
| <b>Sintaxis</b>                             | DESCRIPTIVES<br>VARIABLES=CHOL.PRE.P<br>CHOL.POST.P CHOL.PRE.<br>T20 CHOL.POST.T20<br>HDL.PRE.P HDL.POST.P<br>HDL.PRE.T20 HDL.POST.<br>T20 LDL.PRE.P LDL.<br>POST.P LDL.PRE.T20<br>LDL.POST.T20 TAG.PRE.<br>P TAG.POST.P TAG.PRE.<br>T20 TAG.POST.T20 GLU.<br>PRE.P GLU.POST.P GLU.<br>PRE.T20 GLU.POST.T20<br>mtDNA.PRE.P mtDNA.<br>POST.P mtDNA.PRE.T20<br>mtDNA.POST.T20 CRT.<br>PRE.P CRT.POST.P CRT.<br>PRE.T20 CRT.POST.T20<br>AST.PRE.P AST.POST.P<br>AST.PRE.T20 AST.POST.<br>T20 ALT.PRE.P ALT.<br>POST.P ALT.PRE.T20<br>ALT.POST.T20 BIL.PRE.P<br>BIL.POST.P BIL.PRE.T20<br>BIL.POST.T20 PROT.PRE.<br>P<br>PRO.POST.P PRO.PRE.<br>T20 PROT.POST.T20<br>/STATISTICS=MEAN<br>STDDEV SEMEAN. |                                                                               |
| <b>Recursos</b>                             | <b>Tiempo de procesador</b>                                                                                                                                                                                                                                                                                                                                                                                                                                                                                                                                                                                                                                                                         | 00:00:00.01                                                                   |
|                                             | <b>Tiempo transcurrido</b>                                                                                                                                                                                                                                                                                                                                                                                                                                                                                                                                                                                                                                                                          | 00:00:00.00                                                                   |

[Conjunto\_de\_datos1] /Users/SergioBarroso/Desktop/T20-RAL Reviewers/Base de datos/T20.sav

Estadísticos descriptivos

|                        | N           | Media       |              | Desv. típ.  |
|------------------------|-------------|-------------|--------------|-------------|
|                        | Estadístico | Estadístico | Error típico | Estadístico |
| CHOL.PRE.P             | 12          | 181.8333    | 10.94327     | 37.90858    |
| CHOL.POST.P            | 12          | 173.1667    | 11.55542     | 40.02916    |
| CHOL.PRE.T20           | 12          | 183.9167    | 13.45951     | 46.62512    |
| CHOL.POST.T20          | 12          | 172.4167    | 10.12756     | 35.08291    |
| HDL.PRE.P              | 11          | 50.4545     | 2.83601      | 9.40599     |
| HDL.POST.P             | 12          | 48.0833     | 2.61829      | 9.07001     |
| HDL.PRE.T20            | 12          | 48.2500     | 2.20236      | 7.62919     |
| HDL.POST.T20           | 12          | 49.4167     | 2.59504      | 8.98947     |
| LDL.PRE.P              | 11          | 110.6364    | 7.56700      | 25.09690    |
| LDL.POST.P             | 12          | 108.0000    | 8.92647      | 30.92219    |
| LDL.PRE.T20            | 12          | 118.3333    | 11.36337     | 39.36388    |
| LDL.POST.T20           | 12          | 104.4167    | 8.12167      | 28.13428    |
| TAG.PRE.P              | 12          | 85.0833     | 14.64554     | 50.73363    |
| TAG.POST.P             | 12          | 85.2500     | 13.08777     | 45.33737    |
| TAG.PRE.T20            | 12          | 86.6667     | 10.76001     | 37.27376    |
| TAG.POST.T20           | 12          | 92.7500     | 13.80389     | 47.81807    |
| GLU.PRE.P              | 12          | 81.0000     | 2.36130      | 8.17980     |
| GLU.POST.P             | 12          | 82.8333     | 2.40528      | 8.33212     |
| GLU.PRE.T20            | 12          | 82.5000     | 1.97139      | 6.82908     |
| GLU.POST.T20           | 12          | 84.7500     | 1.66572      | 5.77022     |
| mtDNA.PRE.P            | 12          | .7129       | .07962       | .27581      |
| mtDNA.POST.P           | 12          | .6251       | .06851       | .23734      |
| mtDNA.PRE.T20          | 12          | .6203       | .05365       | .18585      |
| mtDNA.POST.T20         | 12          | .6824       | .07028       | .24345      |
| CRT.PRE.P              | 12          | 1.1500      | .02611       | .09045      |
| CRT.POST.P             | 12          | 1.1417      | .02876       | .09962      |
| CRT.PRE.T20            | 11          | 1.1091      | .03426       | .11362      |
| CRT.POST.T20           | 11          | 1.1545      | .02473       | .08202      |
| AST.PRE.P              | 12          | 26.0833     | 2.77832      | 9.62439     |
| AST.POST.P             | 12          | 23.5000     | 1.77312      | 6.14225     |
| AST.PRE.T20            | 11          | 23.4545     | 1.89432      | 6.28273     |
| AST.POST.T20           | 11          | 23.7273     | 1.54385      | 5.12037     |
| ALT.PRE.P              | 12          | 23.3333     | 1.52918      | 5.29723     |
| ALT.POST.P             | 12          | 21.1667     | 1.34183      | 4.64823     |
| ALT.PRE.T20            | 11          | 22.2727     | 2.43494      | 8.07578     |
| ALT.POST.T20           | 11          | 23.6364     | 2.53080      | 8.39372     |
| BIL.PRE.P              | 12          | .9000       | .09692       | .33575      |
| BIL.POST.P             | 12          | .9667       | .15635       | .54160      |
| BIL.PRE.T20            | 11          | .7909       | .04946       | .16404      |
| BIL.POST.T20           | 11          | 1.0727      | .11839       | .39266      |
| PROT.PRE.P             | 12          | 74.5000     | 2.04680      | 7.09033     |
| PRO.POST.P             | 12          | 74.2500     | 1.75432      | 6.07716     |
| PRO.PRE.T20            | 11          | 74.2727     | 1.88820      | 6.26244     |
| PROT.POST.T20          | 11          | 74.9091     | 2.08656      | 6.92033     |
| N válido (según lista) | 11          |             |              |             |

```

GET
  FILE='/Users/SergioBarroso/Desktop/T20-RAL Reviewers/Base de datos/T20.sav'.
DATASET NAME Conjunto_de_datos1 WINDOW=FRONT.
EXECUTE.
*Nonparametric Tests: Related Samples.
NPTESTS
  /RELATED TEST(CHOL.PRE.P CHOL.PRE.T20) WILCOXON
  /MISSING SCOPE=ANALYSIS USERMISSING=EXCLUDE
  /CRITERIA ALPHA=0.05 CILEVEL=95.

```

## Pruebas no paramétricas

### Notas

|                           |                                                                                                                                                        |
|---------------------------|--------------------------------------------------------------------------------------------------------------------------------------------------------|
| <b>Resultados creados</b> | 22-MAR-2019 17:25:13                                                                                                                                   |
| <b>Comentarios</b>        |                                                                                                                                                        |
| <b>Entrada</b>            | <b>Datos</b>                                                                                                                                           |
|                           | /Users/SergioBarroso/Desktop/T20-RAL Reviewers/Base de datos/T20.sav                                                                                   |
|                           | <b>Conjunto de datos activo</b>                                                                                                                        |
|                           | Conjunto_de_datos1                                                                                                                                     |
|                           | <b>Filtro</b>                                                                                                                                          |
|                           | <ninguno>                                                                                                                                              |
|                           | <b>Peso</b>                                                                                                                                            |
|                           | <ninguno>                                                                                                                                              |
|                           | <b>Dividir archivo</b>                                                                                                                                 |
|                           | <ninguno>                                                                                                                                              |
|                           | <b>Núm. de filas del archivo de trabajo</b>                                                                                                            |
|                           | 12                                                                                                                                                     |
| <b>Sintaxis</b>           | NPTESTS<br>/RELATED TEST(CHOL.PRE.P CHOL.PRE.T20)<br>WILCOXON<br>/MISSING<br>SCOPE=ANALYSIS<br>USERMISSING=EXCLUDE<br>/CRITERIA ALPHA=0.05 CILEVEL=95. |
| <b>Recursos</b>           | <b>Tiempo de procesador</b>                                                                                                                            |
|                           | 00:00:00.65                                                                                                                                            |
|                           | <b>Tiempo transcurrido</b>                                                                                                                             |
|                           | 00:00:00.00                                                                                                                                            |

[Conjunto\_de\_datos1] /Users/SergioBarroso/Desktop/T20-RAL Reviewers/Base de datos/T20.sav

### Resumen de prueba de hipótesis

|   | Hipótesis nula                                                              | Test                                                                | Sig. | Decisión                   |
|---|-----------------------------------------------------------------------------|---------------------------------------------------------------------|------|----------------------------|
| 1 | La mediana de las diferencias entre CHOL.PRE.P y CHOL.PRE.T20 es igual a 0. | Prueba de Wilcoxon de los rangos con signo de muestras relacionadas | .695 | Retener la hipótesis nula. |

Se muestran las significancias asintóticas. El nivel de significancia es .05.

Prueba de Wilcoxon de los rangos con signo de muestras relacionadas

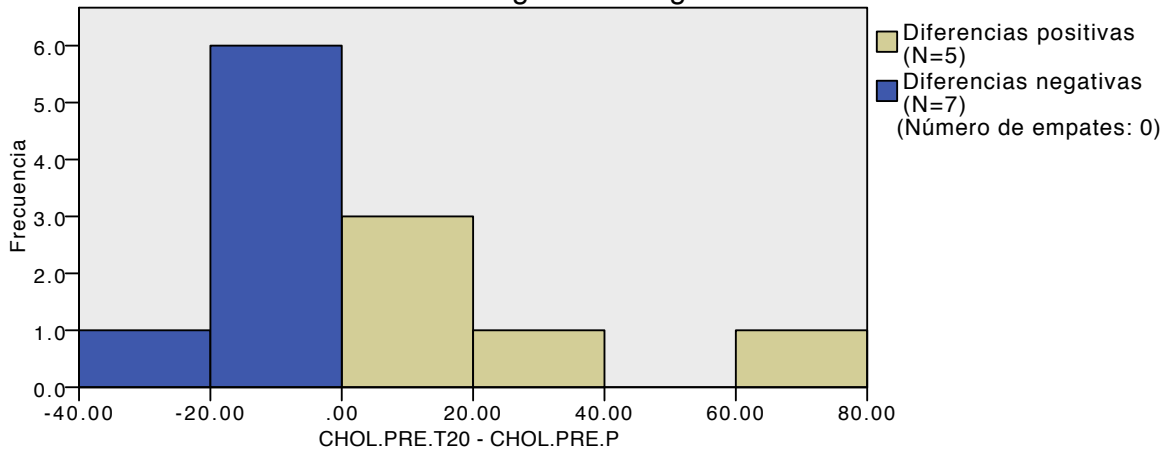

|                                       |        |
|---------------------------------------|--------|
| N total                               | 12     |
| Probar estadística                    | 34.000 |
| Error típico                          | 12.743 |
| Estadística de prueba estandarizada   | -.392  |
| Sig. asintótica (prueba de dos caras) | .695   |

### Información de campo continuo

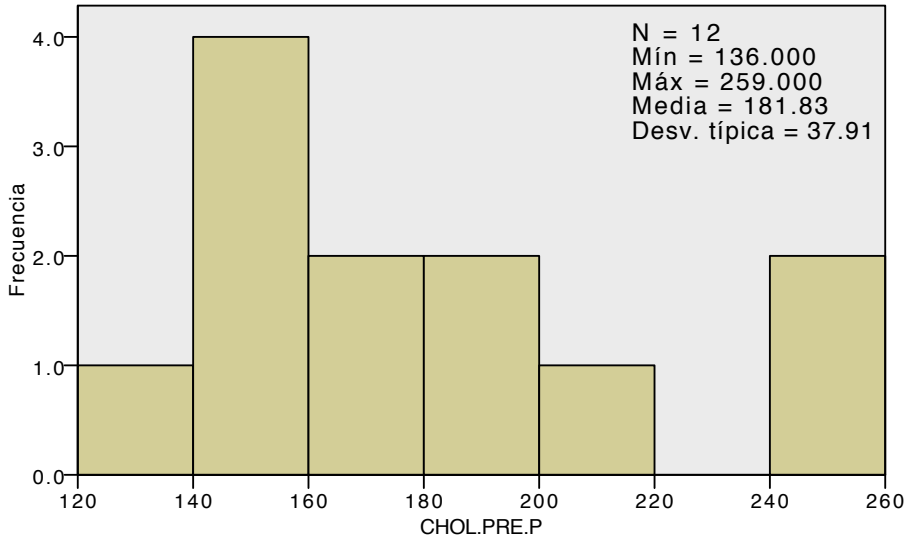

### Información de campo continuo

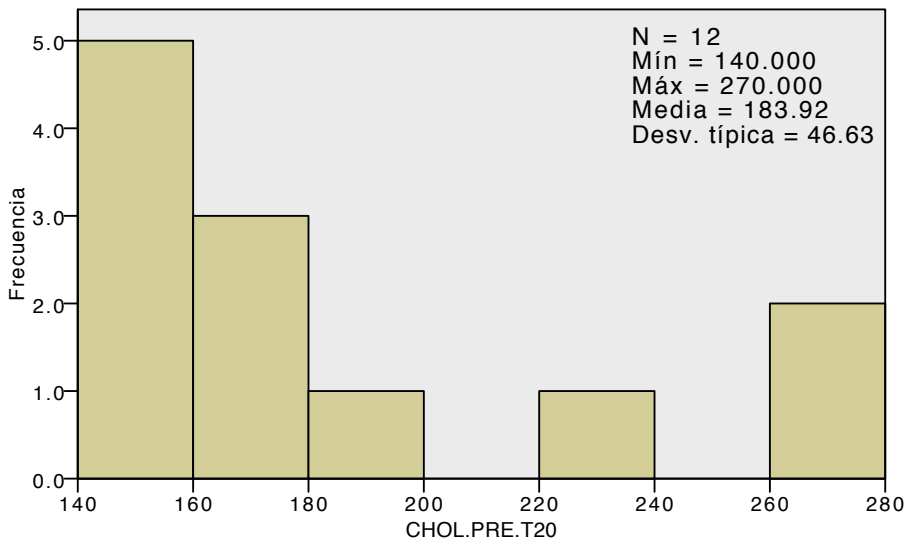

\*Nonparametric Tests: Related Samples.

NPTESTS

/RELATED TEST(HDL.PRE.P HDL.PRE.T20) WILCOXON

/MISSING SCOPE=ANALYSIS USERMISSING=EXCLUDE

/CRITERIA ALPHA=0.05 CILEVEL=95.

## Pruebas no paramétricas

Notas

|                           |                                                                                                                                                      |                                                                      |
|---------------------------|------------------------------------------------------------------------------------------------------------------------------------------------------|----------------------------------------------------------------------|
| <b>Resultados creados</b> | 22-MAR-2019 17:26:15                                                                                                                                 |                                                                      |
| <b>Comentarios</b>        |                                                                                                                                                      |                                                                      |
| <b>Entrada</b>            | <b>Datos</b>                                                                                                                                         | /Users/SergioBarroso/Desktop/T20-RAL Reviewers/Base de datos/T20.sav |
|                           | <b>Conjunto de datos activo</b>                                                                                                                      | Conjunto_de_datos1                                                   |
|                           | <b>Filtro</b>                                                                                                                                        | <ninguno>                                                            |
|                           | <b>Peso</b>                                                                                                                                          | <ninguno>                                                            |
|                           | <b>Dividir archivo</b>                                                                                                                               | <ninguno>                                                            |
|                           | <b>Núm. de filas del archivo de trabajo</b>                                                                                                          | 12                                                                   |
| <b>Sintaxis</b>           | NPTESTS<br>/RELATED TEST(HDL.PRE.P HDL.PRE.T20)<br>WILCOXON<br>/MISSING<br>SCOPE=ANALYSIS<br>USERMISSING=EXCLUDE<br>/CRITERIA ALPHA=0.05 CILEVEL=95. |                                                                      |
| <b>Recursos</b>           | <b>Tiempo de procesador</b>                                                                                                                          | 00:00:00.11                                                          |
|                           | <b>Tiempo transcurrido</b>                                                                                                                           | 00:00:00.00                                                          |

[Conjunto\_de\_datos1] /Users/SergioBarroso/Desktop/T20-RAL Reviewers/Base de datos/T20.sav

Resumen de prueba de hipótesis

|   | Hipótesis nula                                                            | Test                                                                | Sig. | Decisión                   |
|---|---------------------------------------------------------------------------|---------------------------------------------------------------------|------|----------------------------|
| 1 | La mediana de las diferencias entre HDL.PRE.P y HDL.PRE.T20 es igual a 0. | Prueba de Wilcoxon de los rangos con signo de muestras relacionadas | .075 | Retener la hipótesis nula. |

Se muestran las significancias asintóticas. El nivel de significancia es .05.



Prueba de Wilcoxon de los rangos con signo de muestras relacionadas

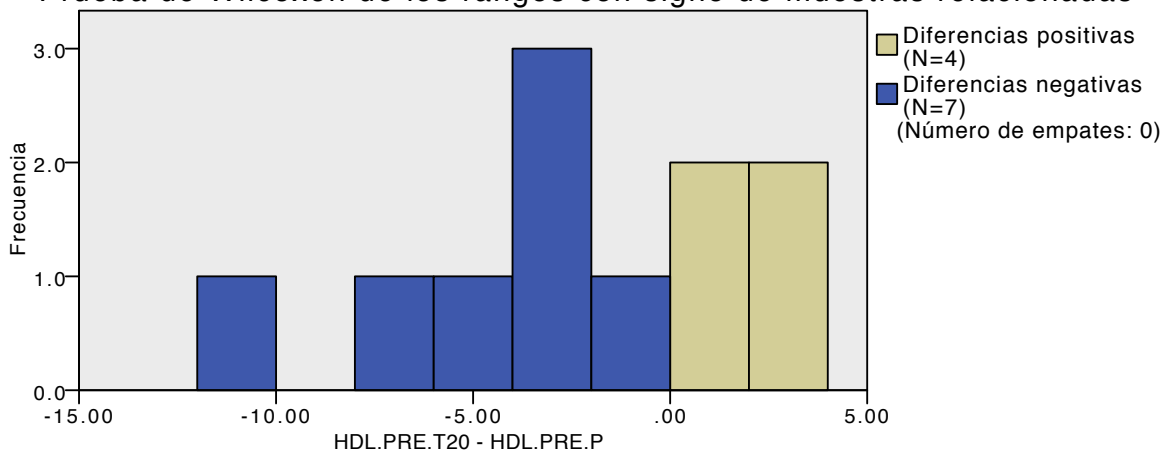

|                                       |        |
|---------------------------------------|--------|
| N total                               | 11     |
| Probar estadística                    | 13.000 |
| Error típico                          | 11.214 |
| Estadística de prueba estandarizada   | -1.784 |
| Sig. asintótica (prueba de dos caras) | .075   |

### Información de campo continuo

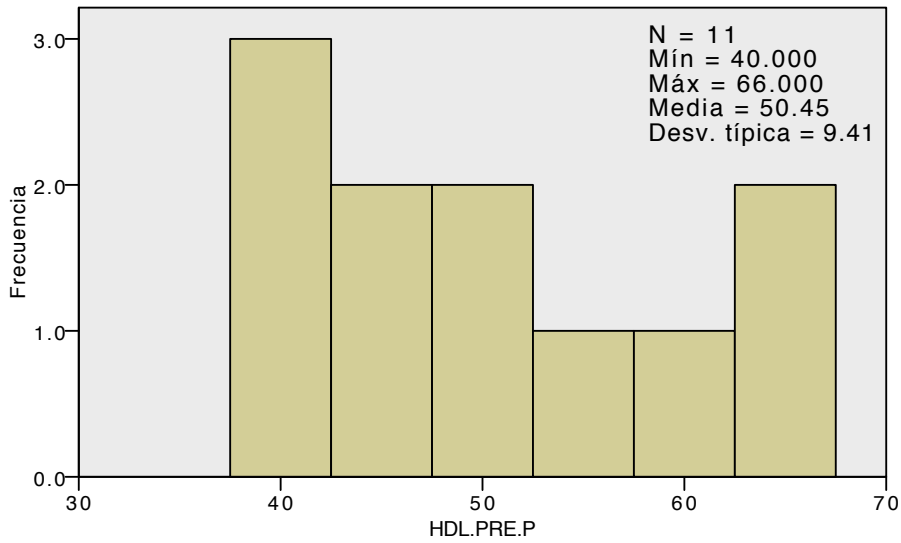

### Información de campo continuo

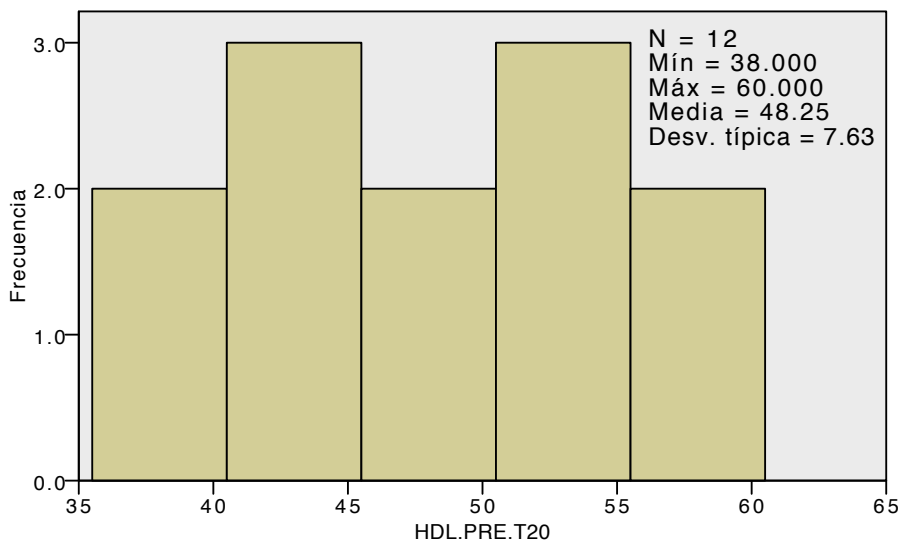

```
*Nonparametric Tests: Related Samples.  
NPTESTS  
/RELATED TEST(LDL.PRE.P LDL.PRE.T20) WILCOXON  
/MISSING SCOPE=ANALYSIS USERMISSING=EXCLUDE  
/CRITERIA ALPHA=0.05 CILEVEL=95.
```

## Pruebas no paramétricas

### Notas

|                           |                                                                                                                                                      |                                                                      |
|---------------------------|------------------------------------------------------------------------------------------------------------------------------------------------------|----------------------------------------------------------------------|
| <b>Resultados creados</b> | 22-MAR-2019 17:27:03                                                                                                                                 |                                                                      |
| <b>Comentarios</b>        |                                                                                                                                                      |                                                                      |
| <b>Entrada</b>            | <b>Datos</b>                                                                                                                                         | /Users/SergioBarroso/Desktop/T20-RAL Reviewers/Base de datos/T20.sav |
|                           | <b>Conjunto de datos activo</b>                                                                                                                      | Conjunto_de_datos1                                                   |
|                           | <b>Filtro</b>                                                                                                                                        | <ninguno>                                                            |
|                           | <b>Peso</b>                                                                                                                                          | <ninguno>                                                            |
|                           | <b>Dividir archivo</b>                                                                                                                               | <ninguno>                                                            |
|                           | <b>Núm. de filas del archivo de trabajo</b>                                                                                                          | 12                                                                   |
| <b>Sintaxis</b>           | NPTESTS<br>/RELATED TEST(LDL.PRE.P LDL.PRE.T20)<br>WILCOXON<br>/MISSING<br>SCOPE=ANALYSIS<br>USERMISSING=EXCLUDE<br>/CRITERIA ALPHA=0.05 CILEVEL=95. |                                                                      |
| <b>Recursos</b>           | <b>Tiempo de procesador</b>                                                                                                                          | 00:00:00.13                                                          |
|                           | <b>Tiempo transcurrido</b>                                                                                                                           | 00:00:00.00                                                          |

[Conjunto\_de\_datos1] /Users/SergioBarroso/Desktop/T20-RAL Reviewers/Base de datos/T20.sav

### Resumen de prueba de hipótesis

|   | Hipótesis nula                                                            | Test                                                                | Sig. | Decisión                   |
|---|---------------------------------------------------------------------------|---------------------------------------------------------------------|------|----------------------------|
| 1 | La mediana de las diferencias entre LDL.PRE.P y LDL.PRE.T20 es igual a 0. | Prueba de Wilcoxon de los rangos con signo de muestras relacionadas | .211 | Retener la hipótesis nula. |

Se muestran las significancias asintóticas. El nivel de significancia es .05.

Prueba de Wilcoxon de los rangos con signo de muestras relacionadas

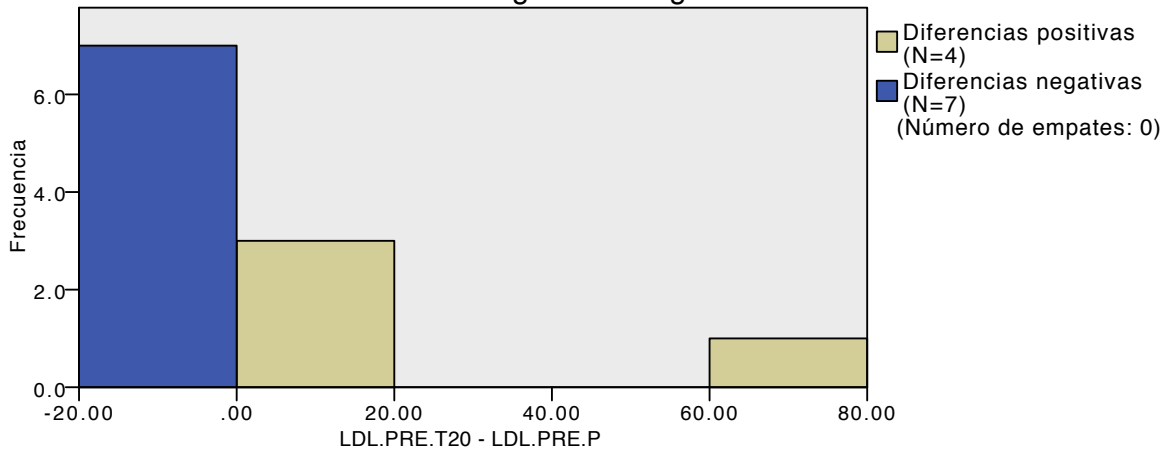

|                                       |        |
|---------------------------------------|--------|
| N total                               | 11     |
| Probar estadística                    | 19.000 |
| Error típico                          | 11.186 |
| Estadística de prueba estandarizada   | -1.252 |
| Sig. asintótica (prueba de dos caras) | .211   |

### Información de campo continuo

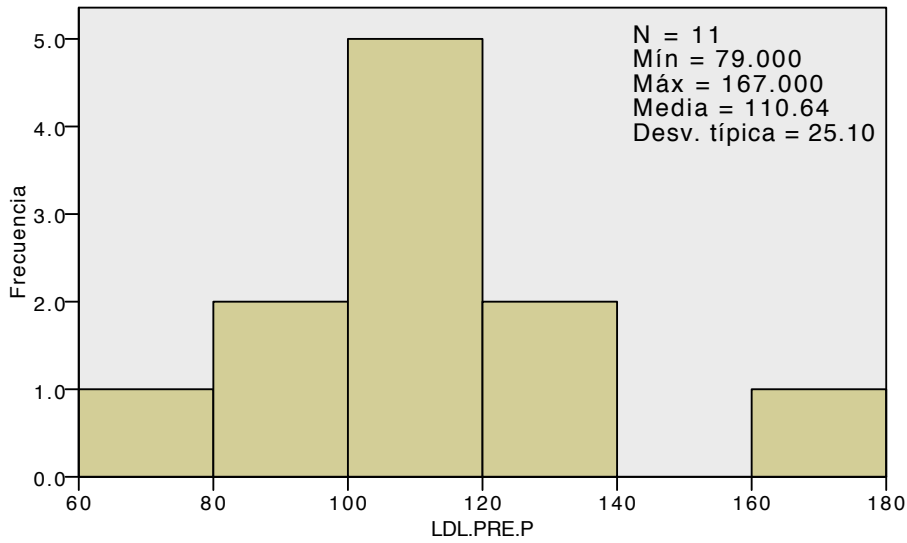

### Información de campo continuo

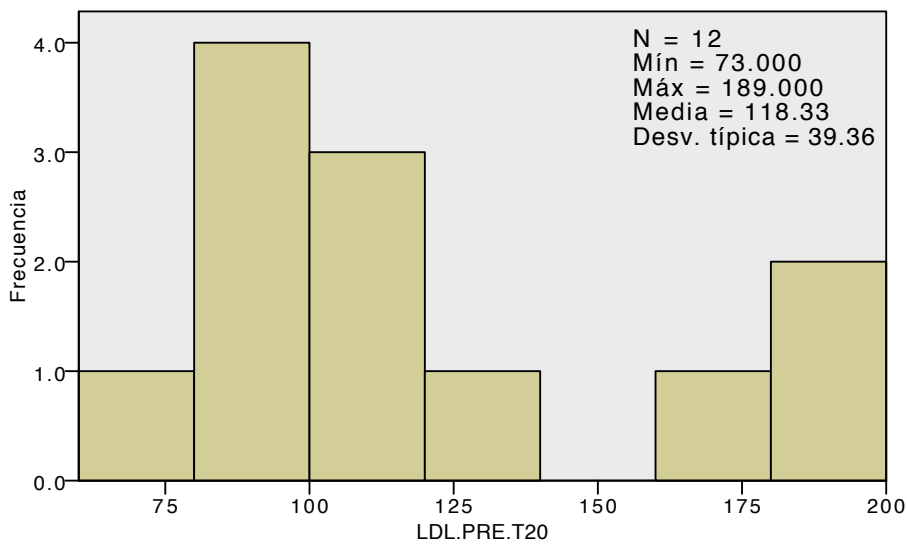

```
*Nonparametric Tests: Related Samples.  
NPTESTS  
/RELATED TEST(TAG.PRE.P TAG.PRE.T20) WILCOXON  
/MISSING SCOPE=ANALYSIS USERMISSING=EXCLUDE  
/CRITERIA ALPHA=0.05 CILEVEL=95.
```

### Pruebas no paramétricas

### Notas

|                           |                                                                                                                                                              |                                                                      |
|---------------------------|--------------------------------------------------------------------------------------------------------------------------------------------------------------|----------------------------------------------------------------------|
| <b>Resultados creados</b> | 22-MAR-2019 17:27:24                                                                                                                                         |                                                                      |
| <b>Comentarios</b>        |                                                                                                                                                              |                                                                      |
| <b>Entrada</b>            | <b>Datos</b>                                                                                                                                                 | /Users/SergioBarroso/Desktop/T20-RAL Reviewers/Base de datos/T20.sav |
|                           | <b>Conjunto de datos activo</b>                                                                                                                              | Conjunto_de_datos1                                                   |
|                           | <b>Filtro</b>                                                                                                                                                | <ninguno>                                                            |
|                           | <b>Peso</b>                                                                                                                                                  | <ninguno>                                                            |
|                           | <b>Dividir archivo</b>                                                                                                                                       | <ninguno>                                                            |
|                           | <b>Núm. de filas del archivo de trabajo</b>                                                                                                                  | 12                                                                   |
| <b>Sintaxis</b>           | NPTESTS<br>/RELATED TEST(TAG.<br>PRE.P TAG.PRE.T20)<br>WILCOXON<br>/MISSING<br>SCOPE=ANALYSIS<br>USERMISSING=EXCLUDE<br>/CRITERIA ALPHA=0.<br>05 CILEVEL=95. |                                                                      |
| <b>Recursos</b>           | <b>Tiempo de procesador</b>                                                                                                                                  | 00:00:00.10                                                          |
|                           | <b>Tiempo transcurrido</b>                                                                                                                                   | 00:00:00.00                                                          |

[Conjunto\_de\_datos1] /Users/SergioBarroso/Desktop/T20-RAL Reviewers/Base de datos/T20.sav

### Resumen de prueba de hipótesis

|   | Hipótesis nula                                                            | Test                                                                | Sig. | Decisión                   |
|---|---------------------------------------------------------------------------|---------------------------------------------------------------------|------|----------------------------|
| 1 | La mediana de las diferencias entre TAG.PRE.P y TAG.PRE.T20 es igual a 0. | Prueba de Wilcoxon de los rangos con signo de muestras relacionadas | .784 | Retener la hipótesis nula. |

Se muestran las significancias asintóticas. El nivel de significancia es .05.

Prueba de Wilcoxon de los rangos con signo de muestras relacionadas

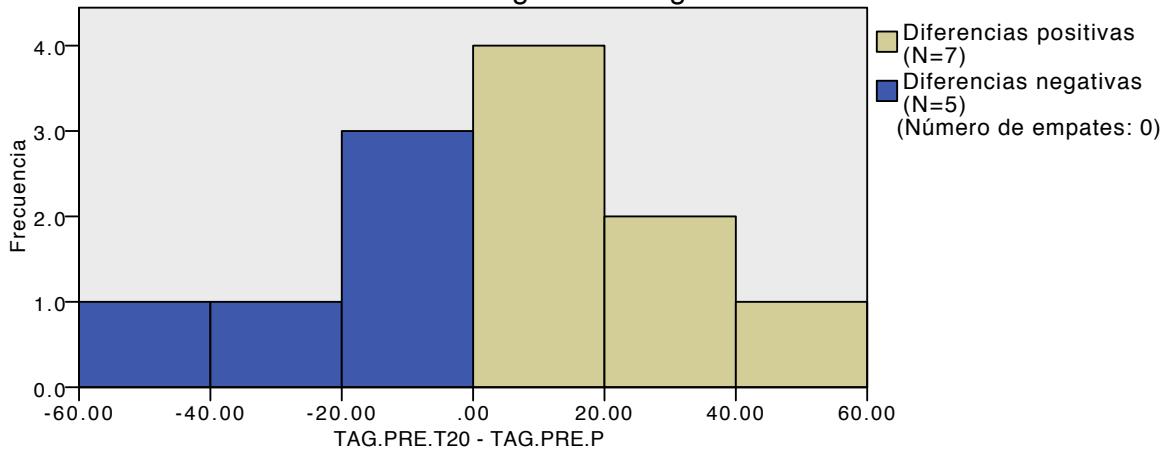

|                                       |        |
|---------------------------------------|--------|
| N total                               | 12     |
| Probar estadística                    | 42.500 |
| Error típico                          | 12.743 |
| Estadística de prueba estandarizada   | .275   |
| Sig. asintótica (prueba de dos caras) | .784   |

### Información de campo continuo

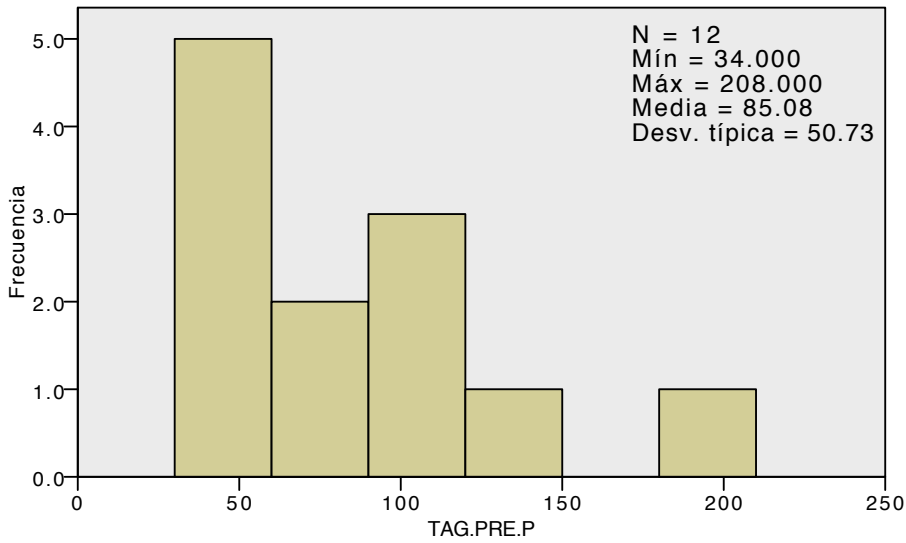

### Información de campo continuo

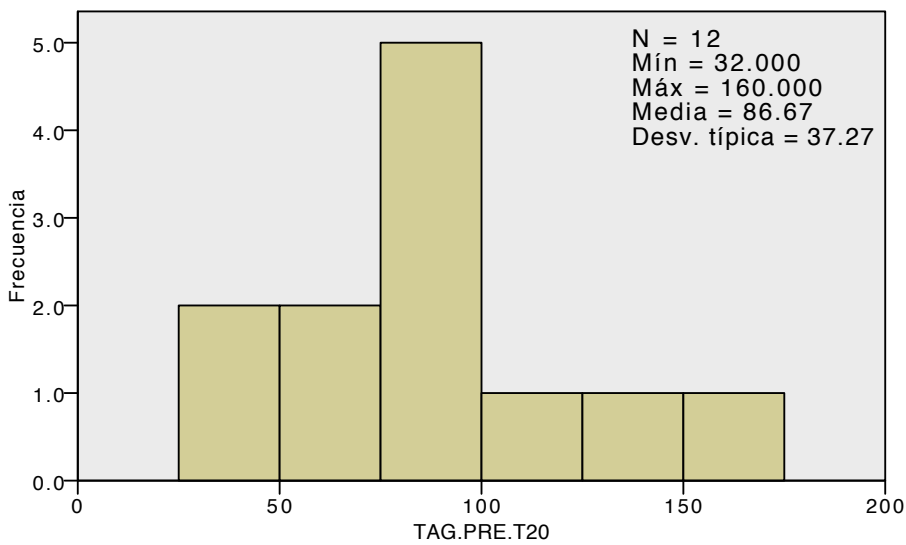

```
*Nonparametric Tests: Related Samples.  
NPTESTS  
/RELATED TEST(GLU.PRE.P GLU.PRE.T20) WILCOXON  
/MISSING SCOPE=ANALYSIS USERMISSING=EXCLUDE  
/CRITERIA ALPHA=0.05 CILEVEL=95.
```

### Pruebas no paramétricas



### Notas

|                           |                                                                                                                                                              |                                                                      |
|---------------------------|--------------------------------------------------------------------------------------------------------------------------------------------------------------|----------------------------------------------------------------------|
| <b>Resultados creados</b> | 22-MAR-2019 17:27:50                                                                                                                                         |                                                                      |
| <b>Comentarios</b>        |                                                                                                                                                              |                                                                      |
| <b>Entrada</b>            | <b>Datos</b>                                                                                                                                                 | /Users/SergioBarroso/Desktop/T20-RAL Reviewers/Base de datos/T20.sav |
|                           | <b>Conjunto de datos activo</b>                                                                                                                              | Conjunto_de_datos1                                                   |
|                           | <b>Filtro</b>                                                                                                                                                | <ninguno>                                                            |
|                           | <b>Peso</b>                                                                                                                                                  | <ninguno>                                                            |
|                           | <b>Dividir archivo</b>                                                                                                                                       | <ninguno>                                                            |
|                           | <b>Núm. de filas del archivo de trabajo</b>                                                                                                                  | 12                                                                   |
| <b>Sintaxis</b>           | NPTESTS<br>/RELATED TEST(GLU.<br>PRE.P GLU.PRE.T20)<br>WILCOXON<br>/MISSING<br>SCOPE=ANALYSIS<br>USERMISSING=EXCLUDE<br>/CRITERIA ALPHA=0.<br>05 CILEVEL=95. |                                                                      |
| <b>Recursos</b>           | <b>Tiempo de procesador</b>                                                                                                                                  | 00:00:00.15                                                          |
|                           | <b>Tiempo transcurrido</b>                                                                                                                                   | 00:00:00.00                                                          |

[Conjunto\_de\_datos1] /Users/SergioBarroso/Desktop/T20-RAL Reviewers/Base de datos/T20.sav

### Resumen de prueba de hipótesis

|   | Hipótesis nula                                                            | Test                                                                | Sig. | Decisión                   |
|---|---------------------------------------------------------------------------|---------------------------------------------------------------------|------|----------------------------|
| 1 | La mediana de las diferencias entre GLU.PRE.P y GLU.PRE.T20 es igual a 0. | Prueba de Wilcoxon de los rangos con signo de muestras relacionadas | .594 | Retener la hipótesis nula. |

Se muestran las significancias asintóticas. El nivel de significancia es .05.

Prueba de Wilcoxon de los rangos con signo de muestras relacionadas

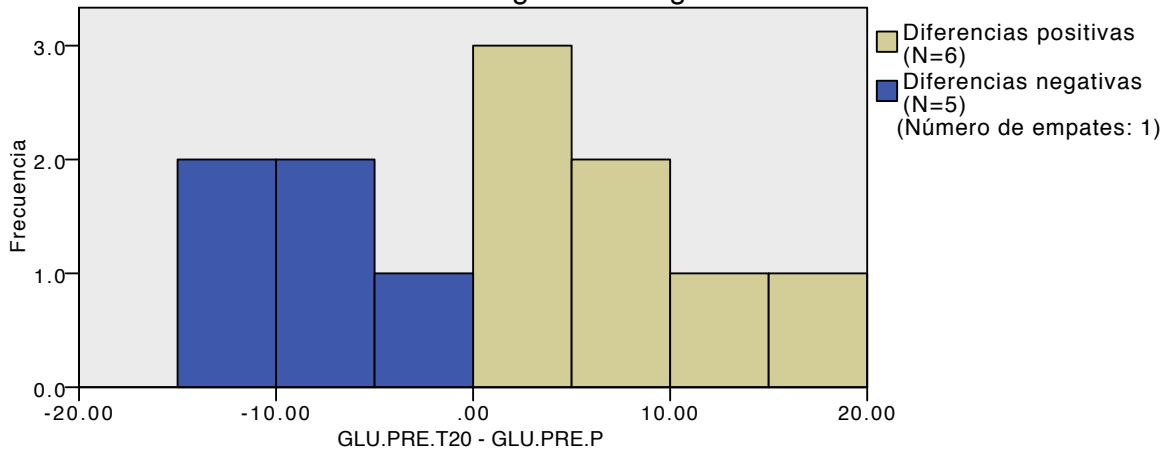

|                                       |        |
|---------------------------------------|--------|
| N total                               | 12     |
| Probar estadística                    | 39.000 |
| Error típico                          | 11.242 |
| Estadística de prueba estandarizada   | .534   |
| Sig. asintótica (prueba de dos caras) | .594   |

### Información de campo continuo

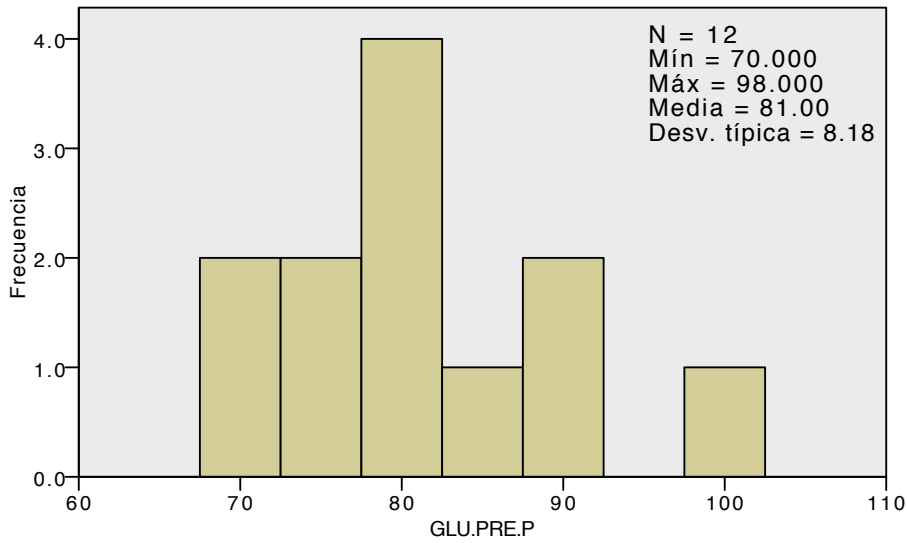

### Información de campo continuo

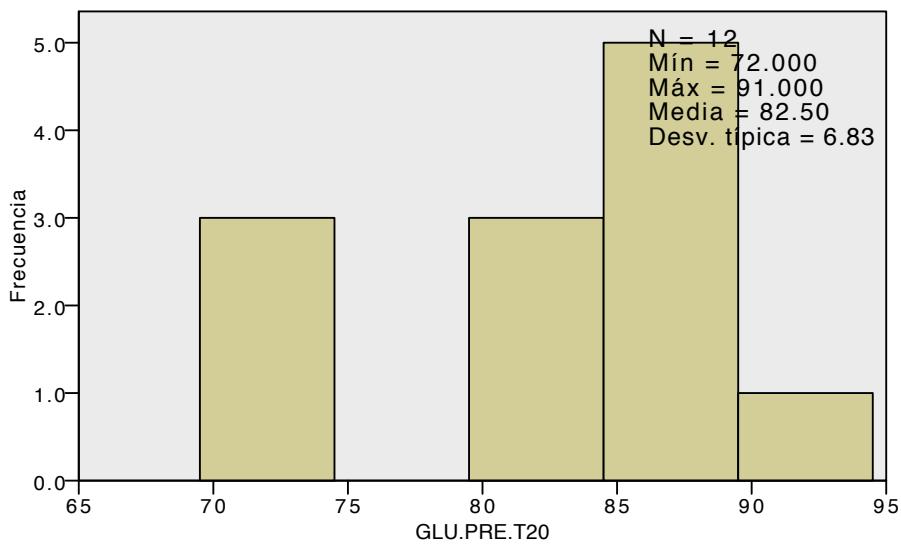

```
*Nonparametric Tests: Related Samples.  
NPTESTS  
/RELATED TEST(mtDNA.PRE.P mtDNA.PRE.T20) WILCOXON  
/MISSING SCOPE=ANALYSIS USERMISSING=EXCLUDE  
/CRITERIA ALPHA=0.05 CILEVEL=95.
```

### Pruebas no paramétricas

### Notas

|                           |                                             |                                                                                                                                                                   |
|---------------------------|---------------------------------------------|-------------------------------------------------------------------------------------------------------------------------------------------------------------------|
| <b>Resultados creados</b> |                                             | 22-MAR-2019 17:28:08                                                                                                                                              |
| <b>Comentarios</b>        |                                             |                                                                                                                                                                   |
| <b>Entrada</b>            | <b>Datos</b>                                | /Users/SergioBarroso/Desktop/T20-RAL Reviewers/Base de datos/T20.sav                                                                                              |
|                           | <b>Conjunto de datos activo</b>             | Conjunto_de_datos1                                                                                                                                                |
|                           | <b>Filtro</b>                               | <ninguno>                                                                                                                                                         |
|                           | <b>Peso</b>                                 | <ninguno>                                                                                                                                                         |
|                           | <b>Dividir archivo</b>                      | <ninguno>                                                                                                                                                         |
|                           | <b>Núm. de filas del archivo de trabajo</b> | 12                                                                                                                                                                |
| <b>Sintaxis</b>           |                                             | NPTESTS<br>/RELATED TEST<br>(mtDNA.PRE.P mtDNA.<br>PRE.T20) WILCOXON<br>/MISSING<br>SCOPE=ANALYSIS<br>USERMISSING=EXCLUDE<br>/CRITERIA ALPHA=0.<br>05 CILEVEL=95. |
| <b>Recursos</b>           | <b>Tiempo de procesador</b>                 | 00:00:00.07                                                                                                                                                       |
|                           | <b>Tiempo transcurrido</b>                  | 00:00:00.00                                                                                                                                                       |

[Conjunto\_de\_datos1] /Users/SergioBarroso/Desktop/T20-RAL Reviewers/Base de datos/T20.sav

### Resumen de prueba de hipótesis

|   | Hipótesis nula                                                                | Test                                                                | Sig. | Decisión                   |
|---|-------------------------------------------------------------------------------|---------------------------------------------------------------------|------|----------------------------|
| 1 | La mediana de las diferencias entre mtDNA.PRE.P y mtDNA.PRE.T20 es igual a 0. | Prueba de Wilcoxon de los rangos con signo de muestras relacionadas | .239 | Retener la hipótesis nula. |

Se muestran las significancias asintóticas. El nivel de significancia es .05.

Prueba de Wilcoxon de los rangos con signo de muestras relacionadas

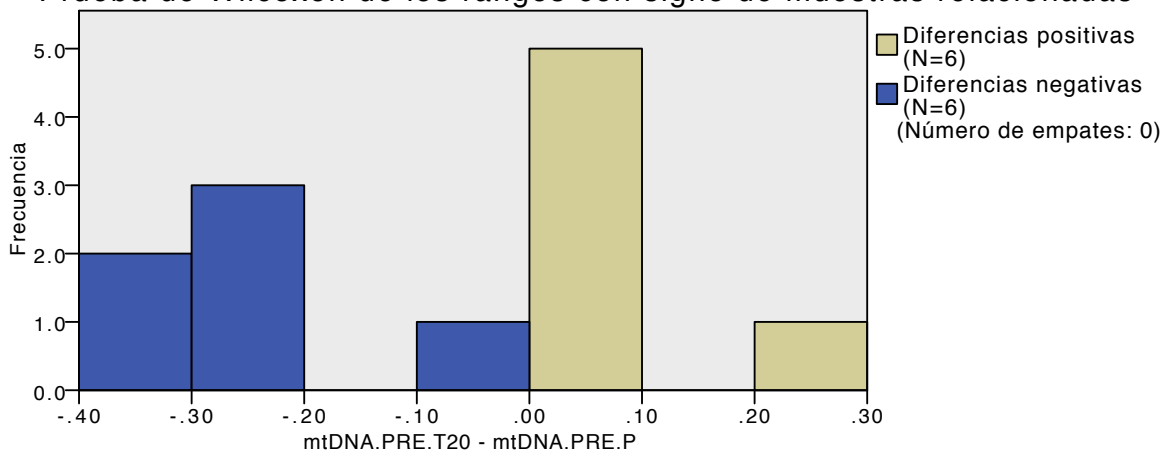

|                                       |        |
|---------------------------------------|--------|
| N total                               | 12     |
| Probar estadística                    | 24.000 |
| Error típico                          | 12.748 |
| Estadística de prueba estandarizada   | -1.177 |
| Sig. asintótica (prueba de dos caras) | .239   |

### Información de campo continuo

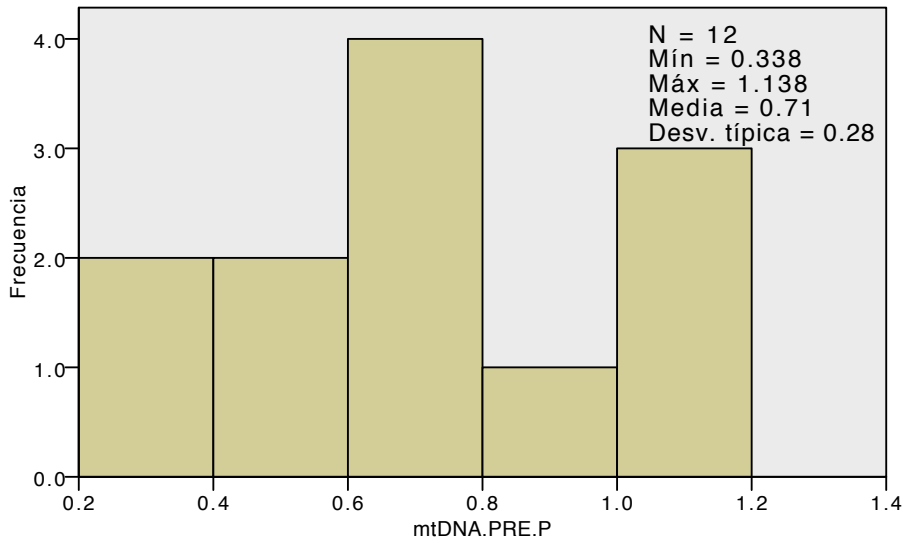

### Información de campo continuo

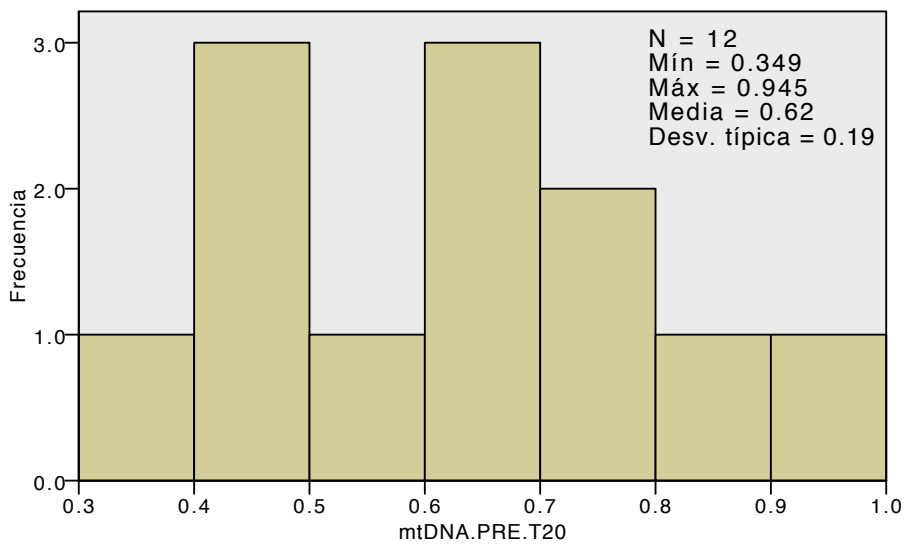

\*Nonparametric Tests: Related Samples.

NPTESTS

/RELATED TEST(CRT.PRE.P CRT.PRE.T20) WILCOXON

/MISSING SCOPE=ANALYSIS USERMISSING=EXCLUDE

/CRITERIA ALPHA=0.05 CILEVEL=95.

## Pruebas no paramétricas

Notas

|                           |                                                                                                                                                              |                                                                      |
|---------------------------|--------------------------------------------------------------------------------------------------------------------------------------------------------------|----------------------------------------------------------------------|
| <b>Resultados creados</b> | 22-MAR-2019 17:28:32                                                                                                                                         |                                                                      |
| <b>Comentarios</b>        |                                                                                                                                                              |                                                                      |
| <b>Entrada</b>            | <b>Datos</b>                                                                                                                                                 | /Users/SergioBarroso/Desktop/T20-RAL Reviewers/Base de datos/T20.sav |
|                           | <b>Conjunto de datos activo</b>                                                                                                                              | Conjunto_de_datos1                                                   |
|                           | <b>Filtro</b>                                                                                                                                                | <ninguno>                                                            |
|                           | <b>Peso</b>                                                                                                                                                  | <ninguno>                                                            |
|                           | <b>Dividir archivo</b>                                                                                                                                       | <ninguno>                                                            |
|                           | <b>Núm. de filas del archivo de trabajo</b>                                                                                                                  | 12                                                                   |
| <b>Sintaxis</b>           | NPTESTS<br>/RELATED TEST(CRT.<br>PRE.P CRT.PRE.T20)<br>WILCOXON<br>/MISSING<br>SCOPE=ANALYSIS<br>USERMISSING=EXCLUDE<br>/CRITERIA ALPHA=0.<br>05 CILEVEL=95. |                                                                      |
| <b>Recursos</b>           | <b>Tiempo de procesador</b>                                                                                                                                  | 00:00:00.11                                                          |
|                           | <b>Tiempo transcurrido</b>                                                                                                                                   | 00:00:00.00                                                          |

[Conjunto\_de\_datos1] /Users/SergioBarroso/Desktop/T20-RAL Reviewers/Base de datos/T20.sav

Resumen de prueba de hipótesis

|   | Hipótesis nula                                                            | Test                                                                | Sig. | Decisión                   |
|---|---------------------------------------------------------------------------|---------------------------------------------------------------------|------|----------------------------|
| 1 | La mediana de las diferencias entre CRT.PRE.P y CRT.PRE.T20 es igual a 0. | Prueba de Wilcoxon de los rangos con signo de muestras relacionadas | .334 | Retener la hipótesis nula. |

Se muestran las significancias asintóticas. El nivel de significancia es .05.

Prueba de Wilcoxon de los rangos con signo de muestras relacionadas

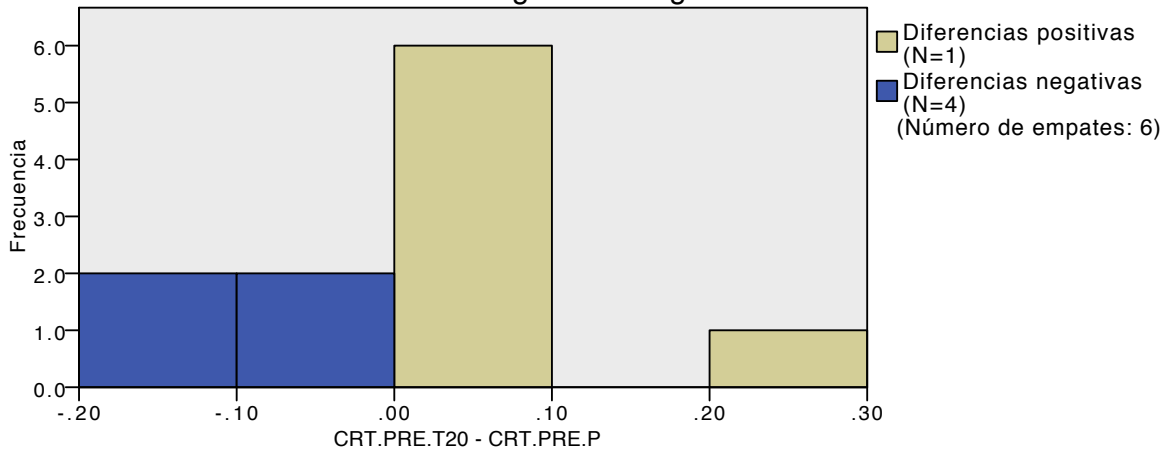

|                                       |       |
|---------------------------------------|-------|
| N total                               | 11    |
| Probar estadística                    | 4.000 |
| Error típico                          | 3.623 |
| Estadística de prueba estandarizada   | -.966 |
| Sig. asintótica (prueba de dos caras) | .334  |



### Información de campo continuo

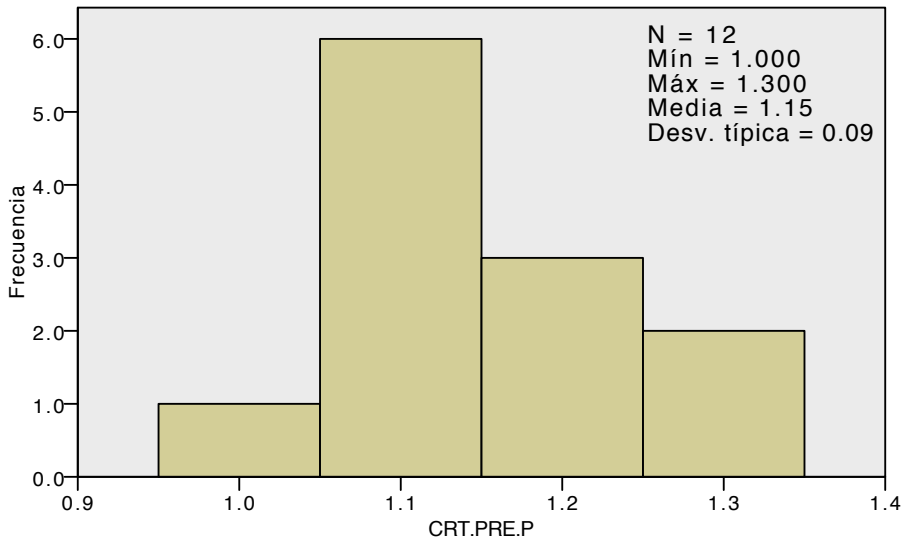

### Información de campo continuo

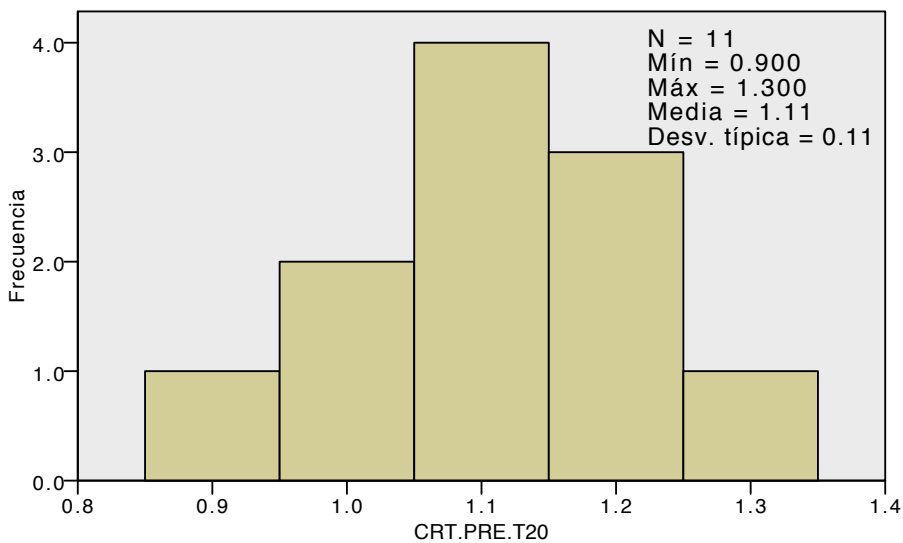

```
*Nonparametric Tests: Related Samples.  
NPTESTS  
/RELATED TEST(AST.PRE.P AST.PRE.T20) WILCOXON  
/MISSING SCOPE=ANALYSIS USERMISSING=EXCLUDE  
/CRITERIA ALPHA=0.05 CILEVEL=95.
```

## Pruebas no paramétricas

### Notas

|                           |                                                                                                                                                              |                                                                      |
|---------------------------|--------------------------------------------------------------------------------------------------------------------------------------------------------------|----------------------------------------------------------------------|
| <b>Resultados creados</b> | 22-MAR-2019 17:30:31                                                                                                                                         |                                                                      |
| <b>Comentarios</b>        |                                                                                                                                                              |                                                                      |
| <b>Entrada</b>            | <b>Datos</b>                                                                                                                                                 | /Users/SergioBarroso/Desktop/T20-RAL Reviewers/Base de datos/T20.sav |
|                           | <b>Conjunto de datos activo</b>                                                                                                                              | Conjunto_de_datos1                                                   |
|                           | <b>Filtro</b>                                                                                                                                                | <ninguno>                                                            |
|                           | <b>Peso</b>                                                                                                                                                  | <ninguno>                                                            |
|                           | <b>Dividir archivo</b>                                                                                                                                       | <ninguno>                                                            |
|                           | <b>Núm. de filas del archivo de trabajo</b>                                                                                                                  | 12                                                                   |
| <b>Sintaxis</b>           | NPTESTS<br>/RELATED TEST(AST.<br>PRE.P AST.PRE.T20)<br>WILCOXON<br>/MISSING<br>SCOPE=ANALYSIS<br>USERMISSING=EXCLUDE<br>/CRITERIA ALPHA=0.<br>05 CILEVEL=95. |                                                                      |
| <b>Recursos</b>           | <b>Tiempo de procesador</b>                                                                                                                                  | 00:00:00.15                                                          |
|                           | <b>Tiempo transcurrido</b>                                                                                                                                   | 00:00:00.00                                                          |

[Conjunto\_de\_datos1] /Users/SergioBarroso/Desktop/T20-RAL Reviewers/Base de datos/T20.sav

### Resumen de prueba de hipótesis

|   | Hipótesis nula                                                            | Test                                                                | Sig. | Decisión                   |
|---|---------------------------------------------------------------------------|---------------------------------------------------------------------|------|----------------------------|
| 1 | La mediana de las diferencias entre AST.PRE.P y AST.PRE.T20 es igual a 0. | Prueba de Wilcoxon de los rangos con signo de muestras relacionadas | .893 | Retener la hipótesis nula. |

Se muestran las significancias asintóticas. El nivel de significancia es .05.

Prueba de Wilcoxon de los rangos con signo de muestras relacionadas

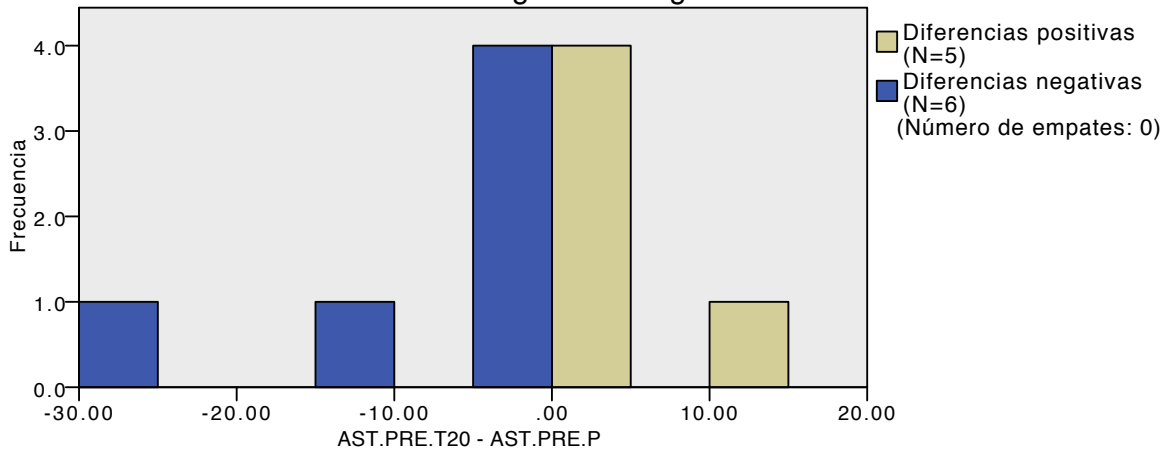

|                                       |        |
|---------------------------------------|--------|
| N total                               | 11     |
| Probar estadística                    | 31.500 |
| Error típico                          | 11.197 |
| Estadística de prueba estandarizada   | -.134  |
| Sig. asintótica (prueba de dos caras) | .893   |

### Información de campo continuo

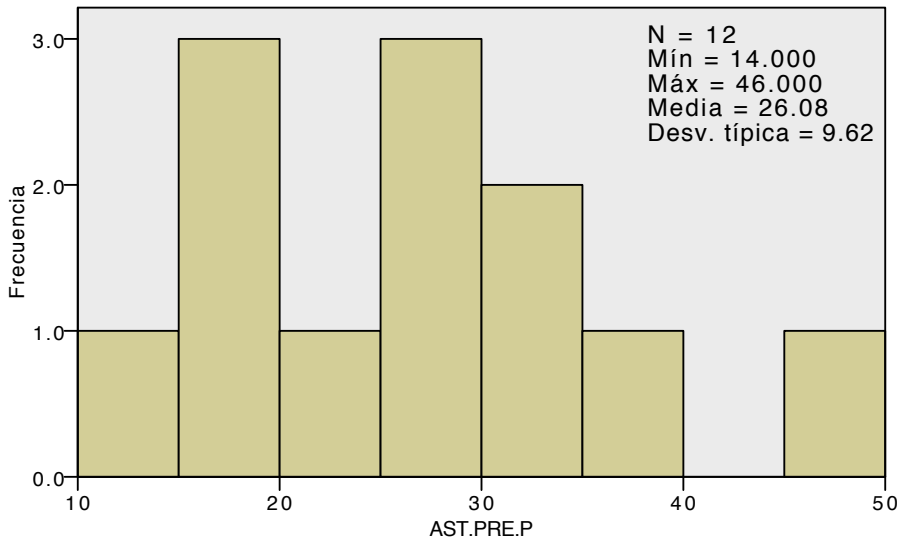

### Información de campo continuo

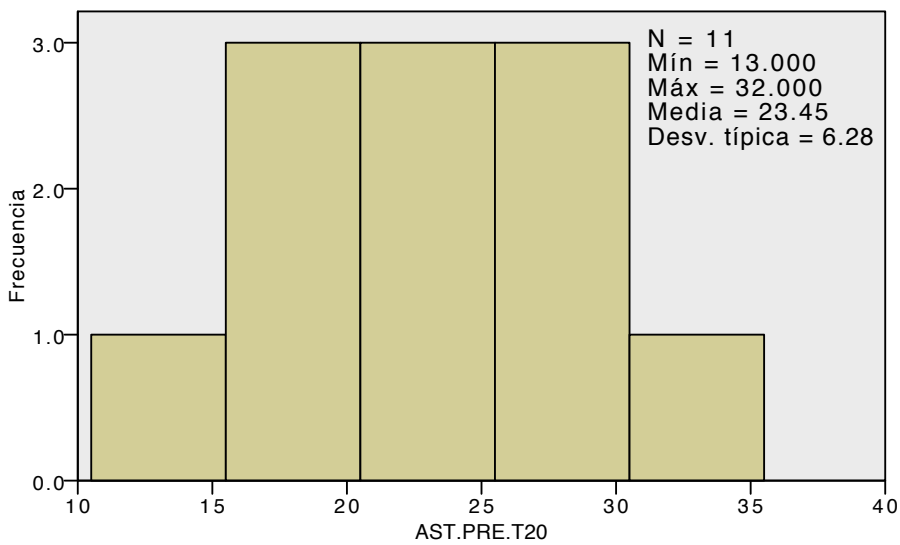

```
*Nonparametric Tests: Related Samples.  
NPTESTS  
/RELATED TEST(ALT.PRE.P ALT.PRE.T20) WILCOXON  
/MISSING SCOPE=ANALYSIS USERMISSING=EXCLUDE  
/CRITERIA ALPHA=0.05 CILEVEL=95.
```

### Pruebas no paramétricas

### Notas

|                           |                                             |                                                                                                                                                      |
|---------------------------|---------------------------------------------|------------------------------------------------------------------------------------------------------------------------------------------------------|
| <b>Resultados creados</b> |                                             | 22-MAR-2019 17:31:06                                                                                                                                 |
| <b>Comentarios</b>        |                                             |                                                                                                                                                      |
| <b>Entrada</b>            | <b>Datos</b>                                | /Users/SergioBarroso/Desktop/T20-RAL Reviewers/Base de datos/T20.sav                                                                                 |
|                           | <b>Conjunto de datos activo</b>             | Conjunto_de_datos1                                                                                                                                   |
|                           | <b>Filtro</b>                               | <ninguno>                                                                                                                                            |
|                           | <b>Peso</b>                                 | <ninguno>                                                                                                                                            |
|                           | <b>Dividir archivo</b>                      | <ninguno>                                                                                                                                            |
|                           | <b>Núm. de filas del archivo de trabajo</b> | 12                                                                                                                                                   |
| <b>Sintaxis</b>           |                                             | NPTESTS<br>/RELATED TEST(ALT.PRE.P ALT.PRE.T20)<br>WILCOXON<br>/MISSING<br>SCOPE=ANALYSIS<br>USERMISSING=EXCLUDE<br>/CRITERIA ALPHA=0.05 CILEVEL=95. |
| <b>Recursos</b>           | <b>Tiempo de procesador</b>                 | 00:00:00.06                                                                                                                                          |
|                           | <b>Tiempo transcurrido</b>                  | 00:00:00.00                                                                                                                                          |

[Conjunto\_de\_datos1] /Users/SergioBarroso/Desktop/T20-RAL Reviewers/Base de datos/T20.sav

### Resumen de prueba de hipótesis

|   | Hipótesis nula                                                            | Test                                                                | Sig. | Decisión                   |
|---|---------------------------------------------------------------------------|---------------------------------------------------------------------|------|----------------------------|
| 1 | La mediana de las diferencias entre ALT.PRE.P y ALT.PRE.T20 es igual a 0. | Prueba de Wilcoxon de los rangos con signo de muestras relacionadas | .422 | Retener la hipótesis nula. |

Se muestran las significancias asintóticas. El nivel de significancia es .05.

Prueba de Wilcoxon de los rangos con signo de muestras relacionadas

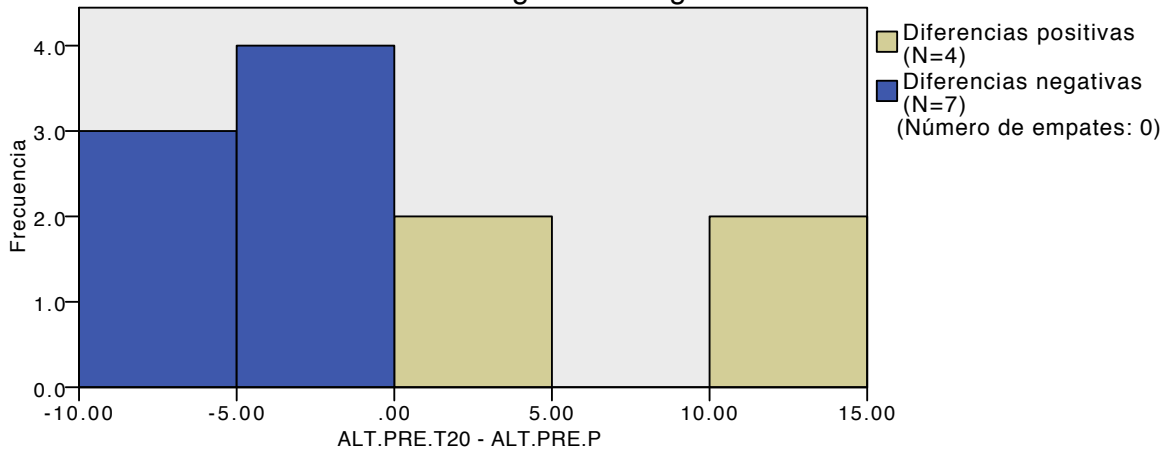

|                                       |        |
|---------------------------------------|--------|
| N total                               | 11     |
| Probar estadística                    | 24.000 |
| Error típico                          | 11.219 |
| Estadística de prueba estandarizada   | -.802  |
| Sig. asintótica (prueba de dos caras) | .422   |

### Información de campo continuo

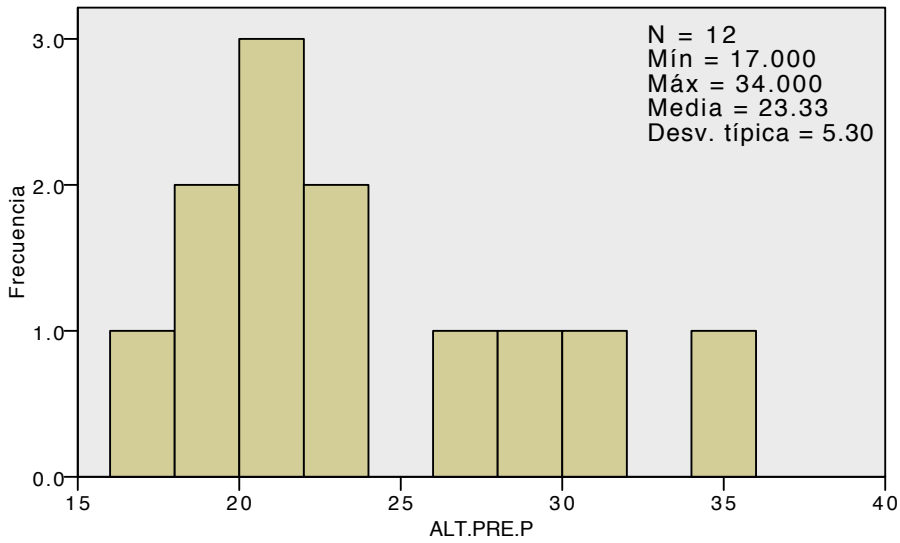

### Información de campo continuo

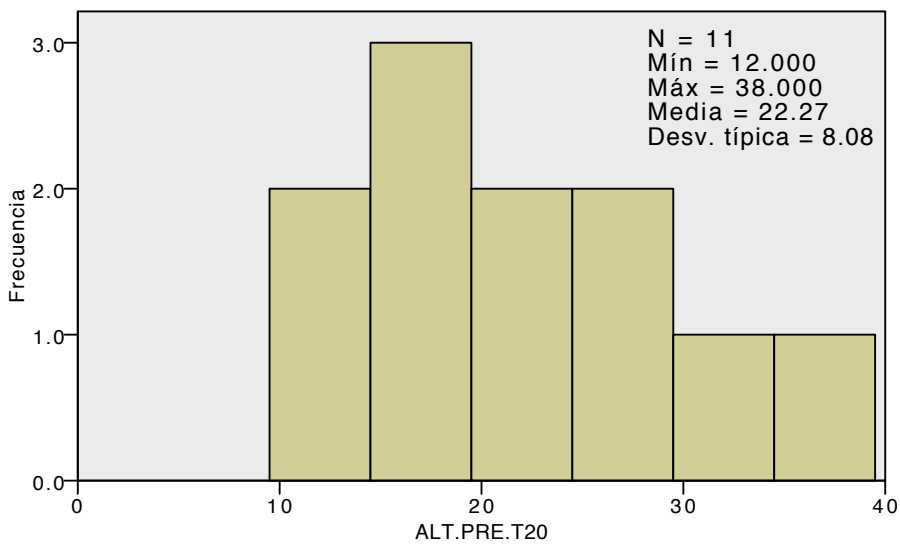

```
*Nonparametric Tests: Related Samples.  
NPTESTS  
/RELATED TEST(BIL.PRE.P BIL.PRE.T20) WILCOXON  
/MISSING SCOPE=ANALYSIS USERMISSING=EXCLUDE  
/CRITERIA ALPHA=0.05 CILEVEL=95.
```

## Pruebas no paramétricas

Notas

|                           |                                                                                                                                                      |                                                                      |
|---------------------------|------------------------------------------------------------------------------------------------------------------------------------------------------|----------------------------------------------------------------------|
| <b>Resultados creados</b> | 22-MAR-2019 17:31:43                                                                                                                                 |                                                                      |
| <b>Comentarios</b>        |                                                                                                                                                      |                                                                      |
| <b>Entrada</b>            | <b>Datos</b>                                                                                                                                         | /Users/SergioBarroso/Desktop/T20-RAL Reviewers/Base de datos/T20.sav |
|                           | <b>Conjunto de datos activo</b>                                                                                                                      | Conjunto_de_datos1                                                   |
|                           | <b>Filtro</b>                                                                                                                                        | <ninguno>                                                            |
|                           | <b>Peso</b>                                                                                                                                          | <ninguno>                                                            |
|                           | <b>Dividir archivo</b>                                                                                                                               | <ninguno>                                                            |
|                           | <b>Núm. de filas del archivo de trabajo</b>                                                                                                          | 12                                                                   |
| <b>Sintaxis</b>           | NPTESTS<br>/RELATED TEST(BIL.PRE.P BIL.PRE.T20)<br>WILCOXON<br>/MISSING<br>SCOPE=ANALYSIS<br>USERMISSING=EXCLUDE<br>/CRITERIA ALPHA=0.05 CILEVEL=95. |                                                                      |
| <b>Recursos</b>           | <b>Tiempo de procesador</b>                                                                                                                          | 00:00:00.22                                                          |
|                           | <b>Tiempo transcurrido</b>                                                                                                                           | 00:00:00.00                                                          |

[Conjunto\_de\_datos1] /Users/SergioBarroso/Desktop/T20-RAL Reviewers/Base de datos/T20.sav

Resumen de prueba de hipótesis

|   | Hipótesis nula                                                            | Test                                                                | Sig. | Decisión                   |
|---|---------------------------------------------------------------------------|---------------------------------------------------------------------|------|----------------------------|
| 1 | La mediana de las diferencias entre BIL.PRE.P y BIL.PRE.T20 es igual a 0. | Prueba de Wilcoxon de los rangos con signo de muestras relacionadas | .177 | Retener la hipótesis nula. |

Se muestran las significancias asintóticas. El nivel de significancia es .05.



Prueba de Wilcoxon de los rangos con signo de muestras relacionadas

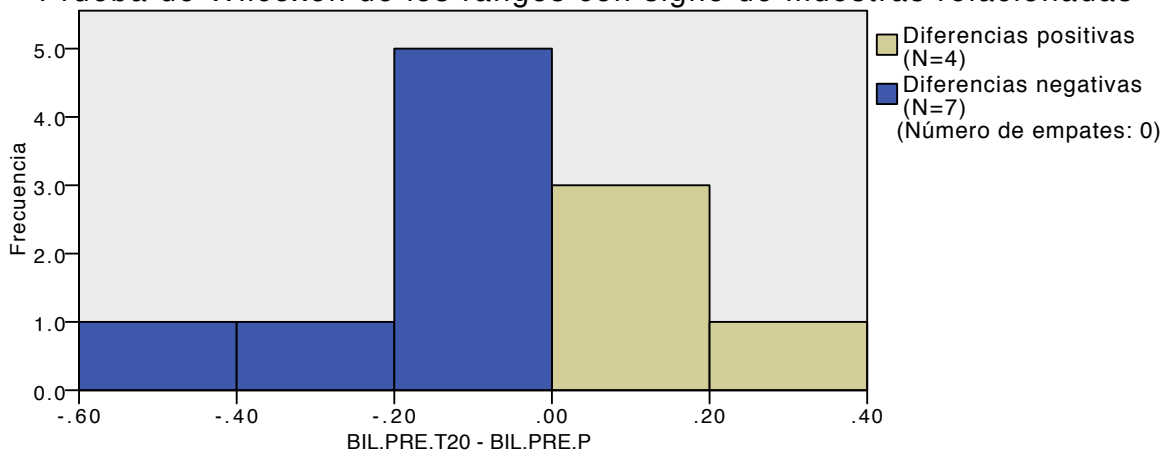

|                                       |        |
|---------------------------------------|--------|
| N total                               | 11     |
| Probar estadística                    | 18.000 |
| Error típico                          | 11.113 |
| Estadística de prueba estandarizada   | -1.350 |
| Sig. asintótica (prueba de dos caras) | .177   |

Información de campo continuo

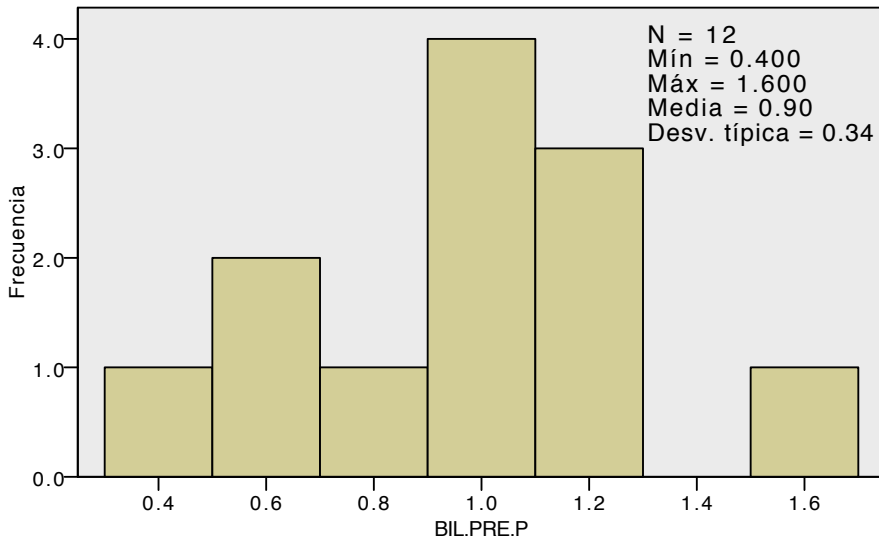

Información de campo continuo

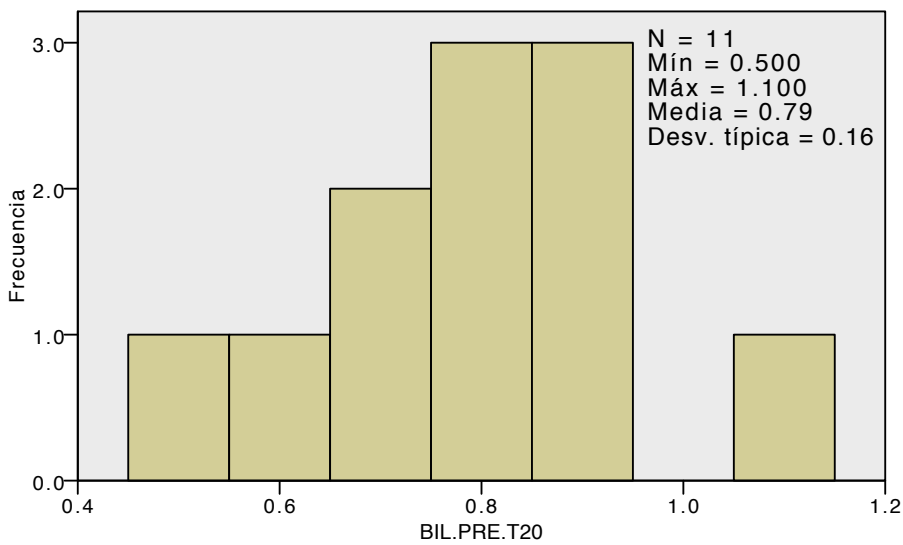

\*Nonparametric Tests: Related Samples.

NPTESTS

/RELATED TEST(PROT.PRE.P PRO.PRE.T20) WILCOXON

/MISSING SCOPE=ANALYSIS USERMISSING=EXCLUDE

/CRITERIA ALPHA=0.05 CILEVEL=95.

## Pruebas no paramétricas

### Notas

|                           |                                                                                                                                                               |                                                                      |
|---------------------------|---------------------------------------------------------------------------------------------------------------------------------------------------------------|----------------------------------------------------------------------|
| <b>Resultados creados</b> | 22-MAR-2019 17:32:30                                                                                                                                          |                                                                      |
| <b>Comentarios</b>        |                                                                                                                                                               |                                                                      |
| <b>Entrada</b>            | <b>Datos</b>                                                                                                                                                  | /Users/SergioBarroso/Desktop/T20-RAL Reviewers/Base de datos/T20.sav |
|                           | <b>Conjunto de datos activo</b>                                                                                                                               | Conjunto_de_datos1                                                   |
|                           | <b>Filtro</b>                                                                                                                                                 | <ninguno>                                                            |
|                           | <b>Peso</b>                                                                                                                                                   | <ninguno>                                                            |
|                           | <b>Dividir archivo</b>                                                                                                                                        | <ninguno>                                                            |
|                           | <b>Núm. de filas del archivo de trabajo</b>                                                                                                                   | 12                                                                   |
| <b>Sintaxis</b>           | NPTESTS<br>/RELATED TEST(PROT.<br>PRE.P PRO.PRE.T20)<br>WILCOXON<br>/MISSING<br>SCOPE=ANALYSIS<br>USERMISSING=EXCLUDE<br>/CRITERIA ALPHA=0.<br>05 CILEVEL=95. |                                                                      |
| <b>Recursos</b>           | <b>Tiempo de procesador</b>                                                                                                                                   | 00:00:00.11                                                          |
|                           | <b>Tiempo transcurrido</b>                                                                                                                                    | 00:00:00.00                                                          |

[Conjunto\_de\_datos1] /Users/SergioBarroso/Desktop/T20-RAL Reviewers/Base de datos/T20.sav

### Resumen de prueba de hipótesis

|   | Hipótesis nula                                                             | Test                                                                | Sig. | Decisión                   |
|---|----------------------------------------------------------------------------|---------------------------------------------------------------------|------|----------------------------|
| 1 | La mediana de las diferencias entre PROT.PRE.P y PRO.PRE.T20 es igual a 0. | Prueba de Wilcoxon de los rangos con signo de muestras relacionadas | .503 | Retener la hipótesis nula. |

Se muestran las significancias asintóticas. El nivel de significancia es .05.

Prueba de Wilcoxon de los rangos con signo de muestras relacionadas

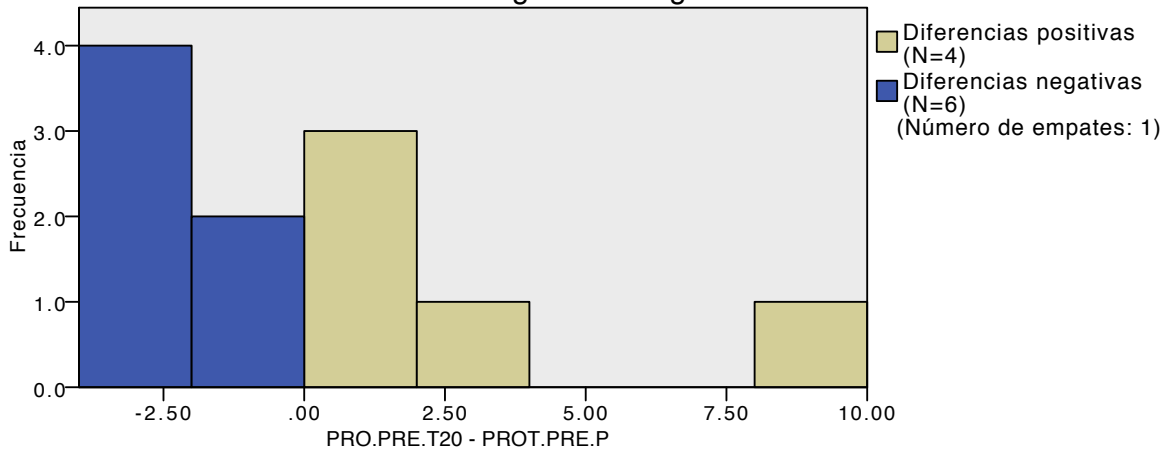

|                                       |        |
|---------------------------------------|--------|
| N total                               | 11     |
| Probar estadística                    | 21.000 |
| Error típico                          | 9.715  |
| Estadística de prueba estandarizada   | -.669  |
| Sig. asintótica (prueba de dos caras) | .503   |

### Información de campo continuo

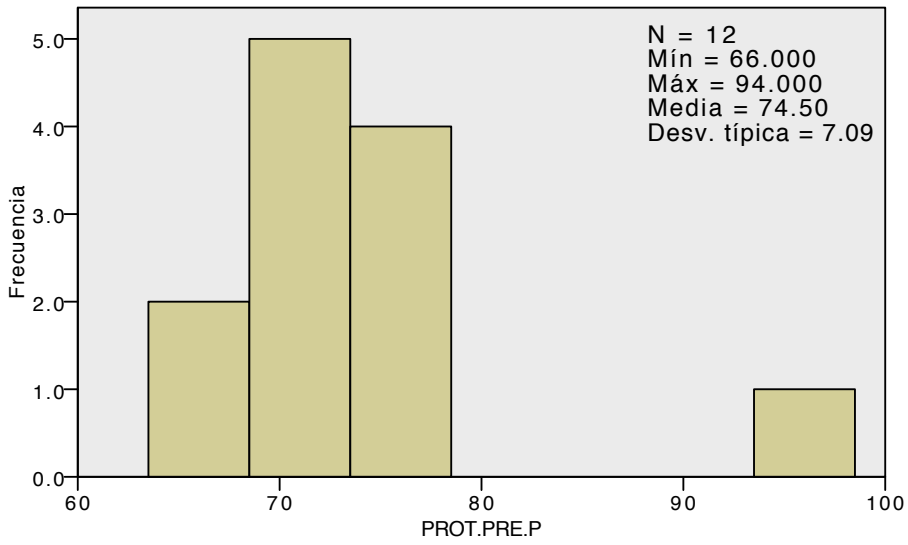

### Información de campo continuo

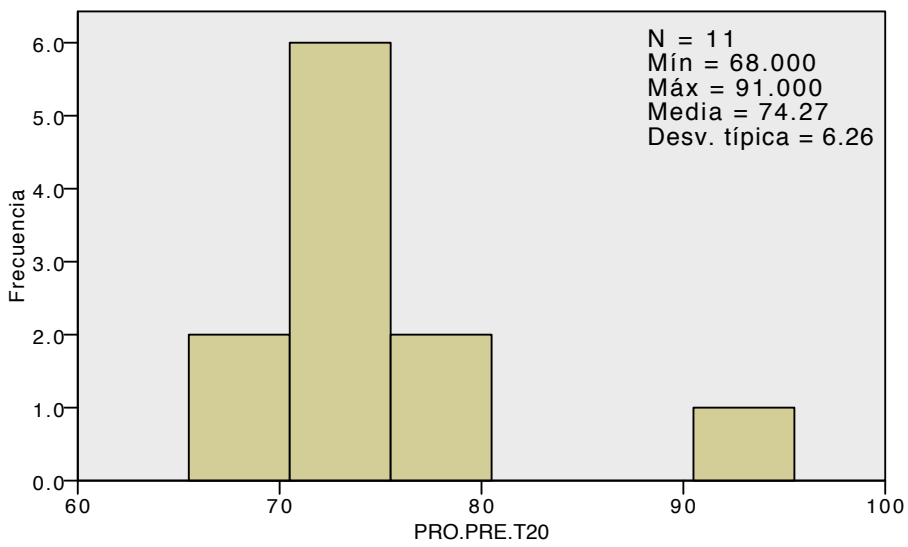

```

DATASET ACTIVATE Conjunto_de_datos1.

SAVE OUTFILE='/Users/SergioBarroso/Desktop/T20-RAL Reviewers/Base de datos/T20.sav'
/COMPRESSED.
DATASET ACTIVATE Conjunto_de_datos1.

SAVE OUTFILE='/Users/SergioBarroso/Desktop/T20-RAL Reviewers/Base de datos/T20.sav'
/COMPRESSED.
*Nonparametric Tests: Related Samples.
NPTESTS
/RELATED TEST(CHOL.DIF.P CHOL.DIF.T20) WILCOXON
/MISSING SCOPE=ANALYSIS USERMISSING=EXCLUDE
/CRITERIA ALPHA=0.05 CILEVEL=95.

```

## Pruebas no paramétricas

### Notas

|                           |                                                                                                                                               |
|---------------------------|-----------------------------------------------------------------------------------------------------------------------------------------------|
| <b>Resultados creados</b> | 23-MAR-2019 17:40:20                                                                                                                          |
| <b>Comentarios</b>        |                                                                                                                                               |
| <b>Entrada</b>            | <b>Datos</b>                                                                                                                                  |
|                           | /Users/SergioBarroso/Desktop/T20-RAL Reviewers/Base de datos/T20.sav                                                                          |
|                           | <b>Conjunto de datos activo</b>                                                                                                               |
|                           | Conjunto_de_datos1                                                                                                                            |
|                           | <b>Filtro</b>                                                                                                                                 |
|                           | <ninguno>                                                                                                                                     |
|                           | <b>Peso</b>                                                                                                                                   |
|                           | <ninguno>                                                                                                                                     |
|                           | <b>Dividir archivo</b>                                                                                                                        |
|                           | <ninguno>                                                                                                                                     |
|                           | <b>Núm. de filas del archivo de trabajo</b>                                                                                                   |
|                           | 12                                                                                                                                            |
| <b>Sintaxis</b>           | NPTESTS<br>/RELATED TEST(CHOL.DIF.P CHOL.DIF.T20) WILCOXON<br>/MISSING SCOPE=ANALYSIS USERMISSING=EXCLUDE<br>/CRITERIA ALPHA=0.05 CILEVEL=95. |
| <b>Recursos</b>           | <b>Tiempo de procesador</b>                                                                                                                   |
|                           | 00:00:00.13                                                                                                                                   |
|                           | <b>Tiempo transcurrido</b>                                                                                                                    |
|                           | 00:00:00.00                                                                                                                                   |

[Conjunto\_de\_datos1] /Users/SergioBarroso/Desktop/T20-RAL Reviewers/Base de datos/T20.sav

### Resumen de prueba de hipótesis

|   | Hipótesis nula                                                                              | Test                                                                | Sig. | Decisión                   |
|---|---------------------------------------------------------------------------------------------|---------------------------------------------------------------------|------|----------------------------|
| 1 | La mediana de las diferencias entre CHOL POST-PRE Placebo y CHOL POST-PRE T20 es igual a 0. | Prueba de Wilcoxon de los rangos con signo de muestras relacionadas | .937 | Retener la hipótesis nula. |

Se muestran las significancias asintóticas. El nivel de significancia es .05.

Prueba de Wilcoxon de los rangos con signo de muestras relacionadas

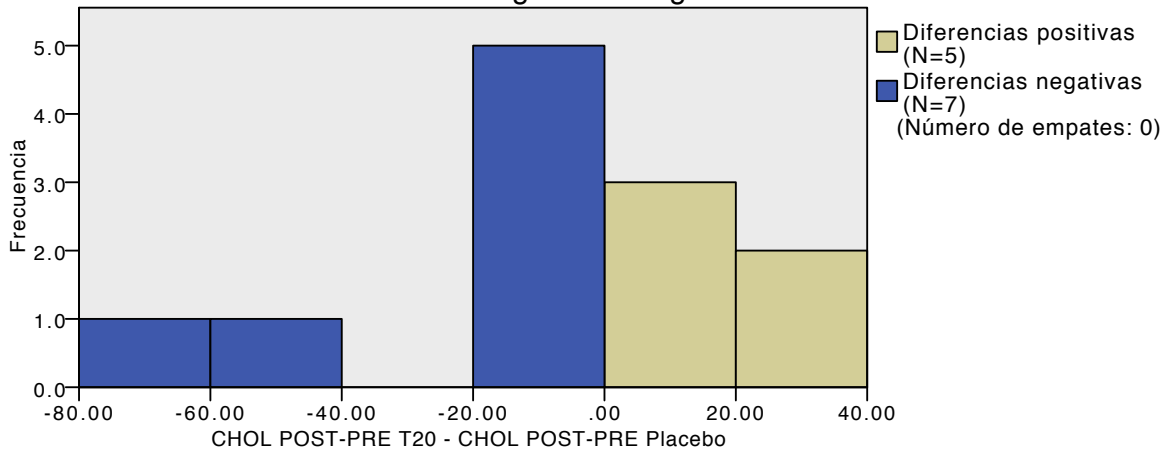

|                                       |        |
|---------------------------------------|--------|
| N total                               | 12     |
| Probar estadística                    | 40.000 |
| Error típico                          | 12.743 |
| Estadística de prueba estandarizada   | .078   |
| Sig. asintótica (prueba de dos caras) | .937   |

### Información de campo continuo

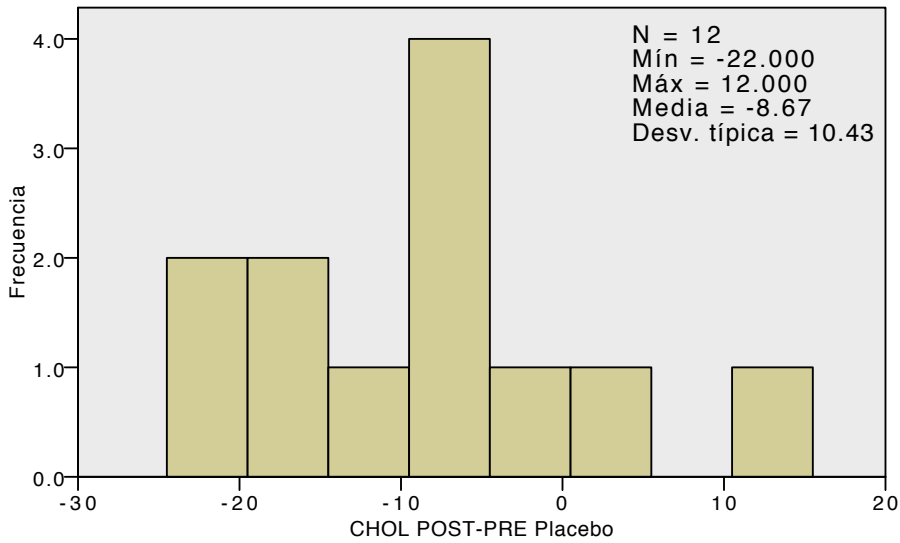

### Información de campo continuo

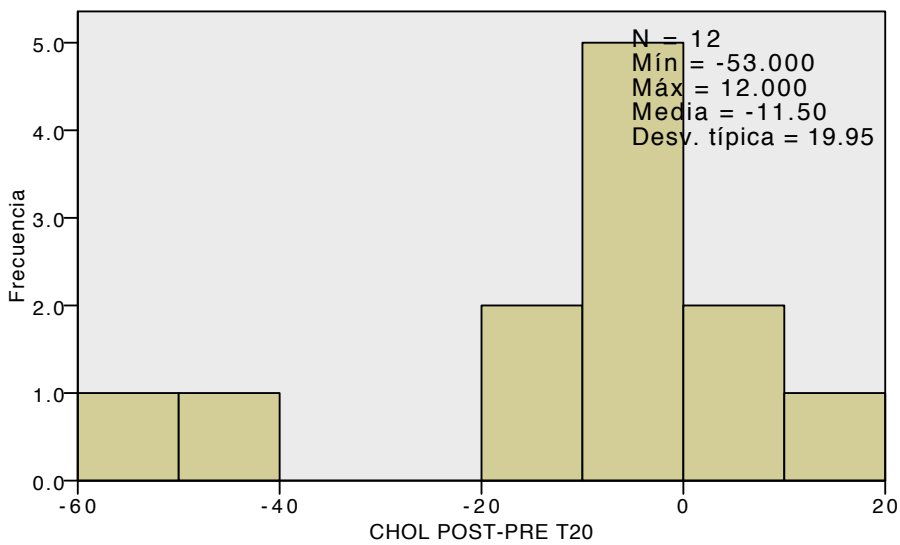

\*Nonparametric Tests: Related Samples.

NPTESTS

/RELATED TEST(HDL.DIF.P HDL.DIF.T20) WILCOXON

/MISSING SCOPE=ANALYSIS USERMISSING=EXCLUDE

/CRITERIA ALPHA=0.05 CILEVEL=95.

### Pruebas no paramétricas



### Notas

|                           |                                                                                                                                                              |                                                                      |
|---------------------------|--------------------------------------------------------------------------------------------------------------------------------------------------------------|----------------------------------------------------------------------|
| <b>Resultados creados</b> | 23-MAR-2019 17:40:51                                                                                                                                         |                                                                      |
| <b>Comentarios</b>        |                                                                                                                                                              |                                                                      |
| <b>Entrada</b>            | <b>Datos</b>                                                                                                                                                 | /Users/SergioBarroso/Desktop/T20-RAL Reviewers/Base de datos/T20.sav |
|                           | <b>Conjunto de datos activo</b>                                                                                                                              | Conjunto_de_datos1                                                   |
|                           | <b>Filtro</b>                                                                                                                                                | <ninguno>                                                            |
|                           | <b>Peso</b>                                                                                                                                                  | <ninguno>                                                            |
|                           | <b>Dividir archivo</b>                                                                                                                                       | <ninguno>                                                            |
|                           | <b>Núm. de filas del archivo de trabajo</b>                                                                                                                  | 12                                                                   |
| <b>Sintaxis</b>           | NPTESTS<br>/RELATED TEST(HDL.<br>DIF.P HDL.DIF.T20)<br>WILCOXON<br>/MISSING<br>SCOPE=ANALYSIS<br>USERMISSING=EXCLUDE<br>/CRITERIA ALPHA=0.<br>05 CILEVEL=95. |                                                                      |
| <b>Recursos</b>           | <b>Tiempo de procesador</b>                                                                                                                                  | 00:00:00.08                                                          |
|                           | <b>Tiempo transcurrido</b>                                                                                                                                   | 00:00:00.00                                                          |

[Conjunto\_de\_datos1] /Users/SergioBarroso/Desktop/T20-RAL Reviewers/Base de datos/T20.sav

### Resumen de prueba de hipótesis

|   | Hipótesis nula                                                                            | Test                                                                | Sig. | Decisión                   |
|---|-------------------------------------------------------------------------------------------|---------------------------------------------------------------------|------|----------------------------|
| 1 | La mediana de las diferencias entre HDL POST-PRE Placebo y HDL POST-PRE T20 es igual a 0. | Prueba de Wilcoxon de los rangos con signo de muestras relacionadas | .200 | Retener la hipótesis nula. |

Se muestran las significancias asintóticas. El nivel de significancia es .05.

Prueba de Wilcoxon de los rangos con signo de muestras relacionadas

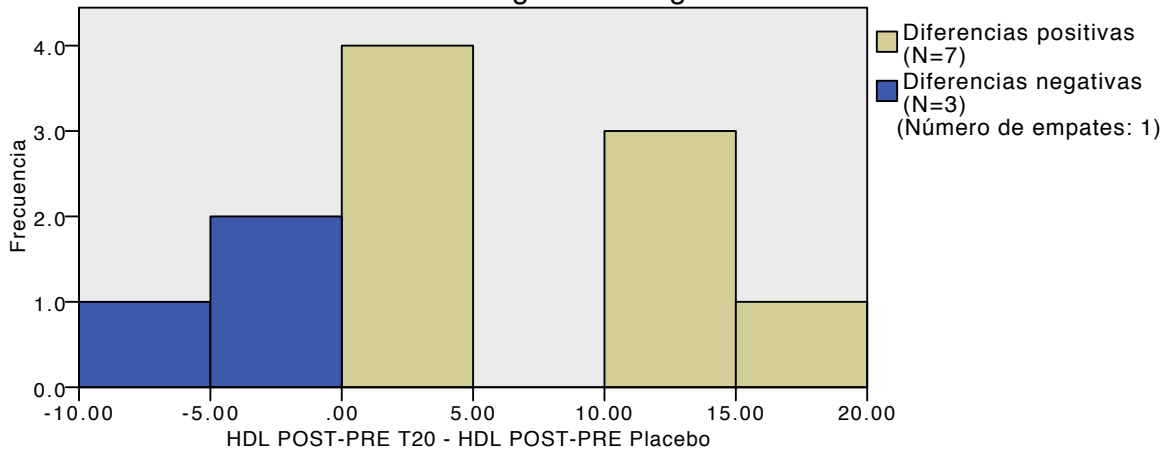

|                                       |        |
|---------------------------------------|--------|
| N total                               | 11     |
| Probar estadística                    | 40.000 |
| Error típico                          | 9.760  |
| Estadística de prueba estandarizada   | 1.281  |
| Sig. asintótica (prueba de dos caras) | .200   |

### Información de campo continuo

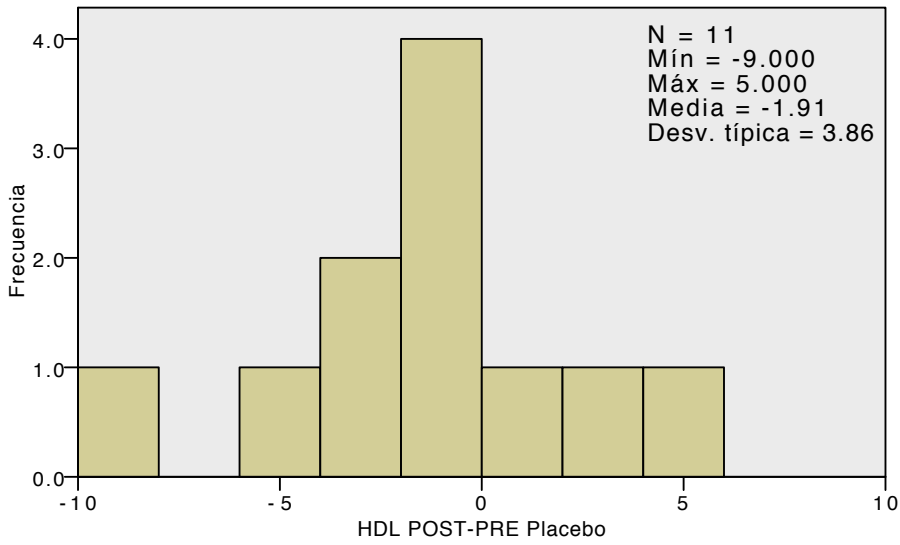

### Información de campo continuo

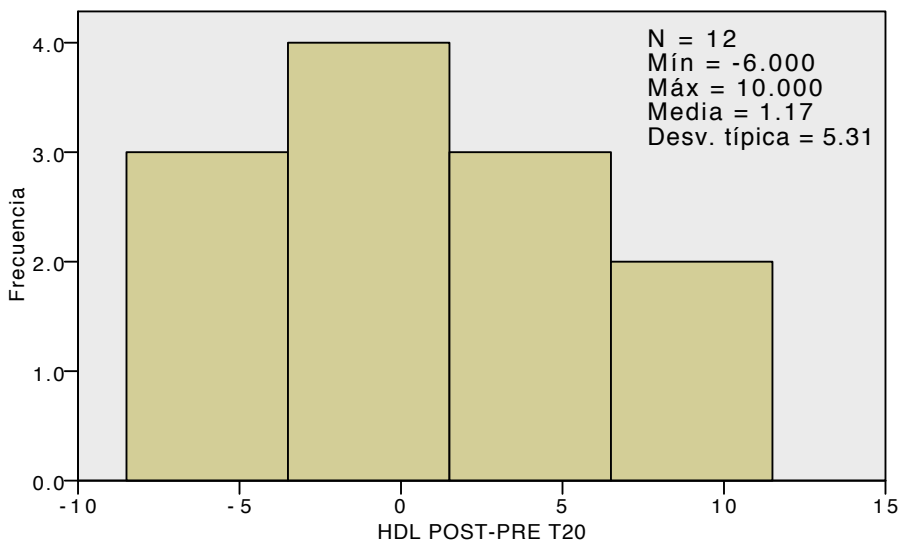

\*Nonparametric Tests: Related Samples.

NPTESTS

/RELATED TEST(LDL.DIF.P LDL.DIF.T20) WILCOXON

/MISSING SCOPE=ANALYSIS USERMISSING=EXCLUDE

/CRITERIA ALPHA=0.05 CILEVEL=95.

### Pruebas no paramétricas

### Notas

|                           |                                                                                                                                                              |                                                                      |
|---------------------------|--------------------------------------------------------------------------------------------------------------------------------------------------------------|----------------------------------------------------------------------|
| <b>Resultados creados</b> | 23-MAR-2019 17:41:21                                                                                                                                         |                                                                      |
| <b>Comentarios</b>        |                                                                                                                                                              |                                                                      |
| <b>Entrada</b>            | <b>Datos</b>                                                                                                                                                 | /Users/SergioBarroso/Desktop/T20-RAL Reviewers/Base de datos/T20.sav |
|                           | <b>Conjunto de datos activo</b>                                                                                                                              | Conjunto_de_datos1                                                   |
|                           | <b>Filtro</b>                                                                                                                                                | <ninguno>                                                            |
|                           | <b>Peso</b>                                                                                                                                                  | <ninguno>                                                            |
|                           | <b>Dividir archivo</b>                                                                                                                                       | <ninguno>                                                            |
|                           | <b>Núm. de filas del archivo de trabajo</b>                                                                                                                  | 12                                                                   |
| <b>Sintaxis</b>           | NPTESTS<br>/RELATED TEST(LDL.<br>DIF.P LDL.DIF.T20)<br>WILCOXON<br>/MISSING<br>SCOPE=ANALYSIS<br>USERMISSING=EXCLUDE<br>/CRITERIA ALPHA=0.<br>05 CILEVEL=95. |                                                                      |
| <b>Recursos</b>           | <b>Tiempo de procesador</b>                                                                                                                                  | 00:00:00.08                                                          |
|                           | <b>Tiempo transcurrido</b>                                                                                                                                   | 00:00:00.00                                                          |

[Conjunto\_de\_datos1] /Users/SergioBarroso/Desktop/T20-RAL Reviewers/Base de datos/T20.sav

### Resumen de prueba de hipótesis

|   | Hipótesis nula                                                                            | Test                                                                | Sig. | Decisión                   |
|---|-------------------------------------------------------------------------------------------|---------------------------------------------------------------------|------|----------------------------|
| 1 | La mediana de las diferencias entre LDL POST-PRE Placebo y LDL POST-PRE T20 es igual a 0. | Prueba de Wilcoxon de los rangos con signo de muestras relacionadas | .798 | Retener la hipótesis nula. |

Se muestran las significancias asintóticas. El nivel de significancia es .05.

Prueba de Wilcoxon de los rangos con signo de muestras relacionadas

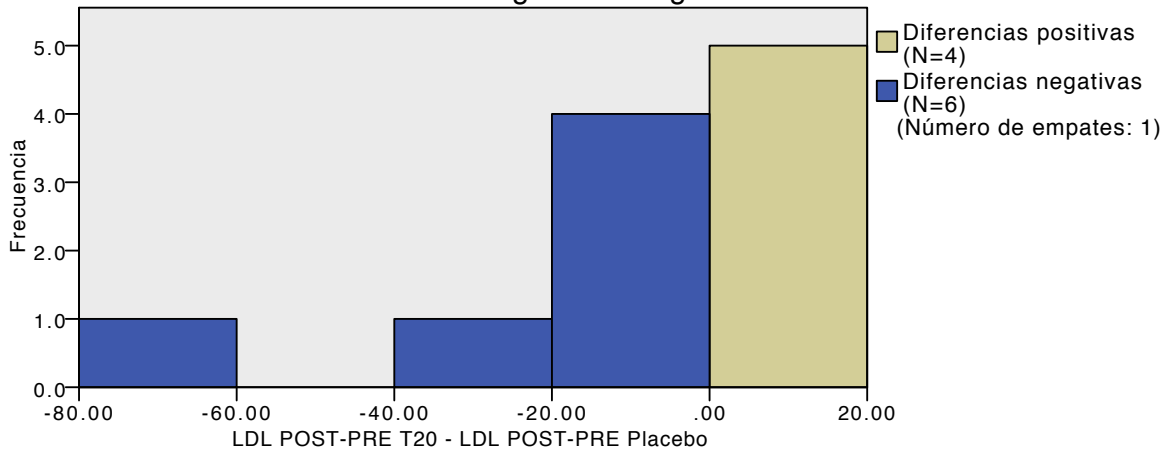

|                                       |        |
|---------------------------------------|--------|
| N total                               | 11     |
| Probar estadística                    | 25.000 |
| Error típico                          | 9.785  |
| Estadística de prueba estandarizada   | -.255  |
| Sig. asintótica (prueba de dos caras) | .798   |

### Información de campo continuo

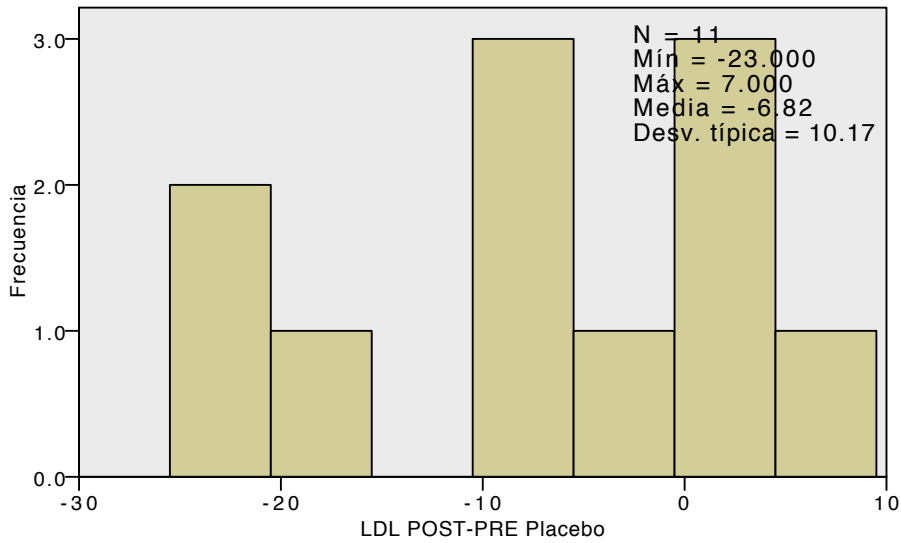

### Información de campo continuo

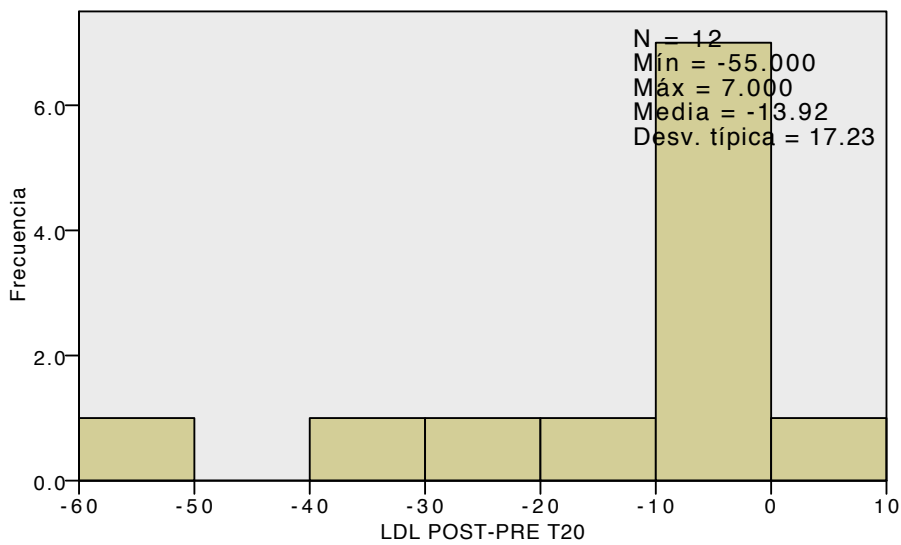

```
*Nonparametric Tests: Related Samples.  
NPTESTS  
/RELATED TEST(TAG.DIF.P TAG.DIF.T20) WILCOXON  
/MISSING SCOPE=ANALYSIS USERMISSING=EXCLUDE  
/CRITERIA ALPHA=0.05 CILEVEL=95.
```

### Pruebas no paramétricas

### Notas

|                           |                                                                                                                                                              |                                                                      |
|---------------------------|--------------------------------------------------------------------------------------------------------------------------------------------------------------|----------------------------------------------------------------------|
| <b>Resultados creados</b> | 23-MAR-2019 17:41:48                                                                                                                                         |                                                                      |
| <b>Comentarios</b>        |                                                                                                                                                              |                                                                      |
| <b>Entrada</b>            | <b>Datos</b>                                                                                                                                                 | /Users/SergioBarroso/Desktop/T20-RAL Reviewers/Base de datos/T20.sav |
|                           | <b>Conjunto de datos activo</b>                                                                                                                              | Conjunto_de_datos1                                                   |
|                           | <b>Filtro</b>                                                                                                                                                | <ninguno>                                                            |
|                           | <b>Peso</b>                                                                                                                                                  | <ninguno>                                                            |
|                           | <b>Dividir archivo</b>                                                                                                                                       | <ninguno>                                                            |
|                           | <b>Núm. de filas del archivo de trabajo</b>                                                                                                                  | 12                                                                   |
| <b>Sintaxis</b>           | NPTESTS<br>/RELATED TEST(TAG.<br>DIF.P TAG.DIF.T20)<br>WILCOXON<br>/MISSING<br>SCOPE=ANALYSIS<br>USERMISSING=EXCLUDE<br>/CRITERIA ALPHA=0.<br>05 CILEVEL=95. |                                                                      |
| <b>Recursos</b>           | <b>Tiempo de procesador</b>                                                                                                                                  | 00:00:00.15                                                          |
|                           | <b>Tiempo transcurrido</b>                                                                                                                                   | 00:00:00.00                                                          |

[Conjunto\_de\_datos1] /Users/SergioBarroso/Desktop/T20-RAL Reviewers/Base de datos/T20.sav

### Resumen de prueba de hipótesis

|   | Hipótesis nula                                                                            | Test                                                                | Sig. | Decisión                   |
|---|-------------------------------------------------------------------------------------------|---------------------------------------------------------------------|------|----------------------------|
| 1 | La mediana de las diferencias entre TAG POST-PRE Placebo y TAG POST-PRE T20 es igual a 0. | Prueba de Wilcoxon de los rangos con signo de muestras relacionadas | .695 | Retener la hipótesis nula. |

Se muestran las significancias asintóticas. El nivel de significancia es .05.

Prueba de Wilcoxon de los rangos con signo de muestras relacionadas

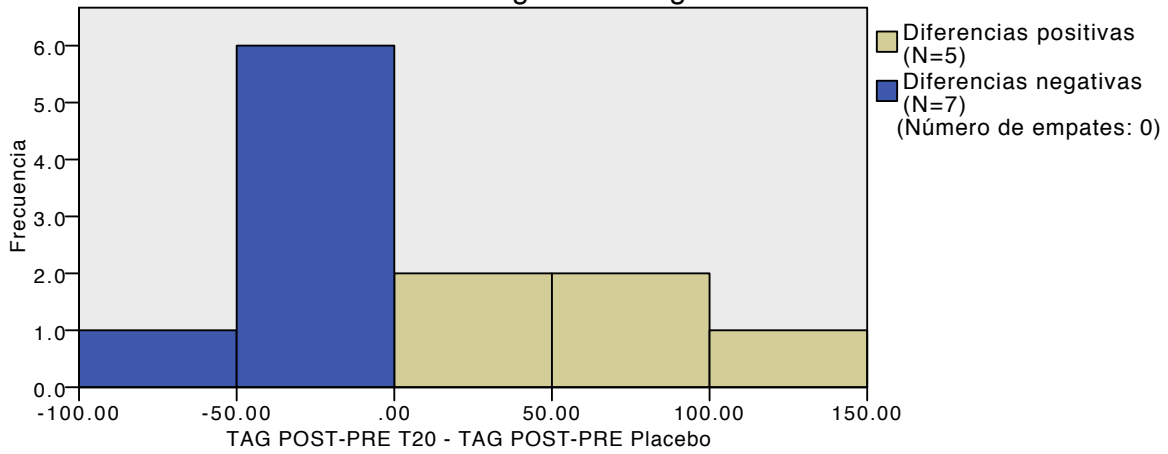

|                                       |        |
|---------------------------------------|--------|
| N total                               | 12     |
| Probar estadística                    | 34.000 |
| Error típico                          | 12.743 |
| Estadística de prueba estandarizada   | -.392  |
| Sig. asintótica (prueba de dos caras) | .695   |



### Información de campo continuo

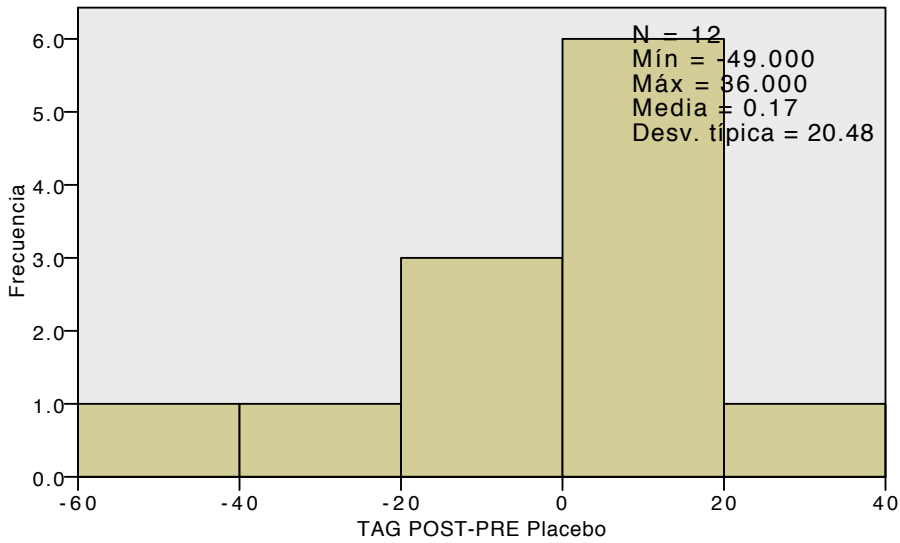

### Información de campo continuo

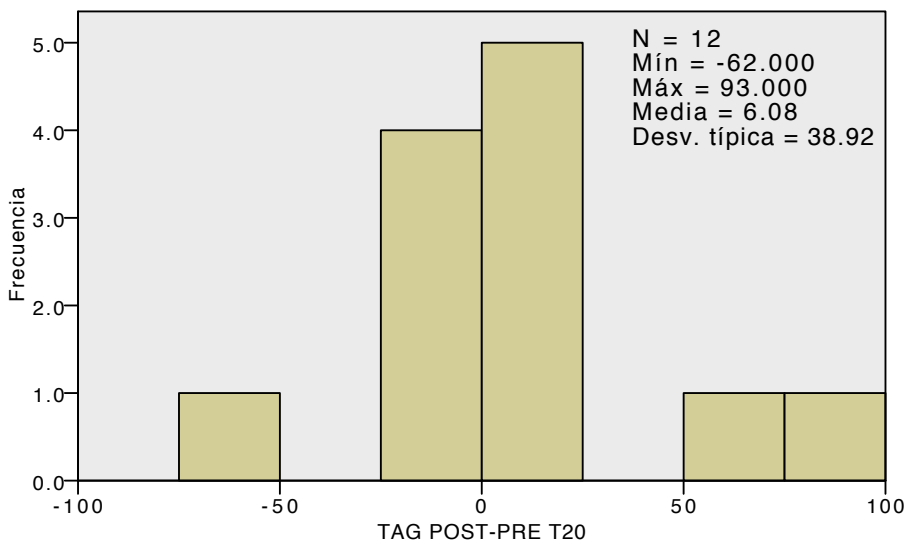

\*Nonparametric Tests: Related Samples.

NPTESTS

/RELATED TEST(GLU.DIF.P GLU.DIF.T20) WILCOXON

/MISSING SCOPE=ANALYSIS USERMISSING=EXCLUDE

/CRITERIA ALPHA=0.05 CILEVEL=95.

### Pruebas no paramétricas

### Notas

|                           |                                                                                                                                                              |                                                                      |
|---------------------------|--------------------------------------------------------------------------------------------------------------------------------------------------------------|----------------------------------------------------------------------|
| <b>Resultados creados</b> | 23-MAR-2019 17:42:06                                                                                                                                         |                                                                      |
| <b>Comentarios</b>        |                                                                                                                                                              |                                                                      |
| <b>Entrada</b>            | <b>Datos</b>                                                                                                                                                 | /Users/SergioBarroso/Desktop/T20-RAL Reviewers/Base de datos/T20.sav |
|                           | <b>Conjunto de datos activo</b>                                                                                                                              | Conjunto_de_datos1                                                   |
|                           | <b>Filtro</b>                                                                                                                                                | <ninguno>                                                            |
|                           | <b>Peso</b>                                                                                                                                                  | <ninguno>                                                            |
|                           | <b>Dividir archivo</b>                                                                                                                                       | <ninguno>                                                            |
|                           | <b>Núm. de filas del archivo de trabajo</b>                                                                                                                  | 12                                                                   |
| <b>Sintaxis</b>           | NPTESTS<br>/RELATED TEST(GLU.<br>DIF.P GLU.DIF.T20)<br>WILCOXON<br>/MISSING<br>SCOPE=ANALYSIS<br>USERMISSING=EXCLUDE<br>/CRITERIA ALPHA=0.<br>05 CILEVEL=95. |                                                                      |
| <b>Recursos</b>           | <b>Tiempo de procesador</b>                                                                                                                                  | 00:00:00.09                                                          |
|                           | <b>Tiempo transcurrido</b>                                                                                                                                   | 00:00:00.00                                                          |

[Conjunto\_de\_datos1] /Users/SergioBarroso/Desktop/T20-RAL Reviewers/Base de datos/T20.sav

### Resumen de prueba de hipótesis

|   | Hipótesis nula                                                                            | Test                                                                | Sig. | Decisión                   |
|---|-------------------------------------------------------------------------------------------|---------------------------------------------------------------------|------|----------------------------|
| 1 | La mediana de las diferencias entre GLU POST-PRE Placebo y GLU POST-PRE T20 es igual a 0. | Prueba de Wilcoxon de los rangos con signo de muestras relacionadas | .656 | Retener la hipótesis nula. |

Se muestran las significancias asintóticas. El nivel de significancia es .05.

Prueba de Wilcoxon de los rangos con signo de muestras relacionadas

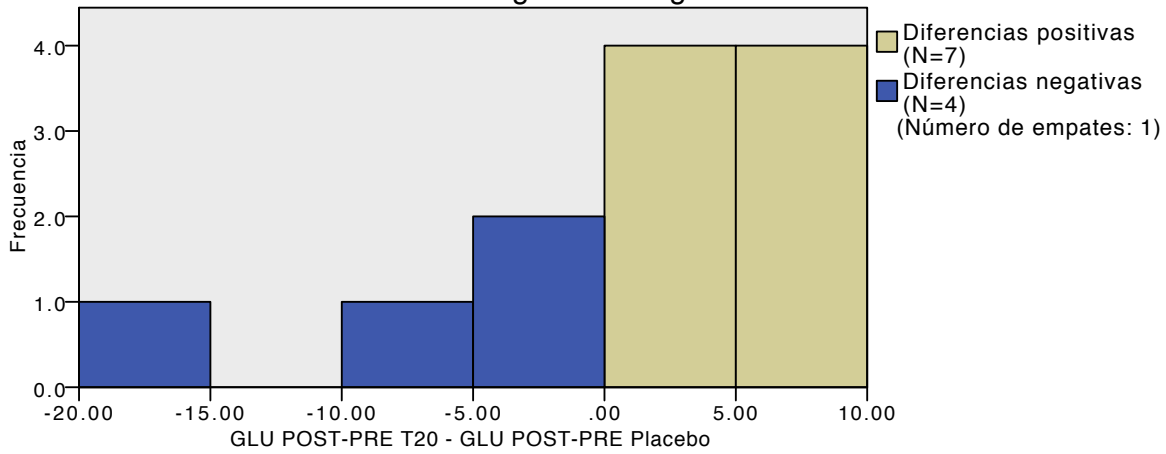

|                                       |        |
|---------------------------------------|--------|
| N total                               | 12     |
| Probar estadística                    | 38.000 |
| Error típico                          | 11.231 |
| Estadística de prueba estandarizada   | .445   |
| Sig. asintótica (prueba de dos caras) | .656   |

### Información de campo continuo

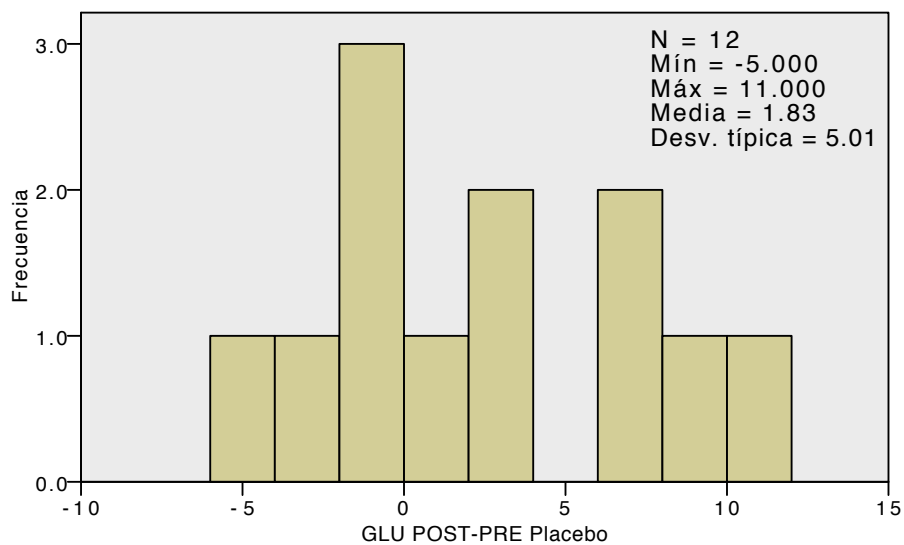

### Información de campo continuo

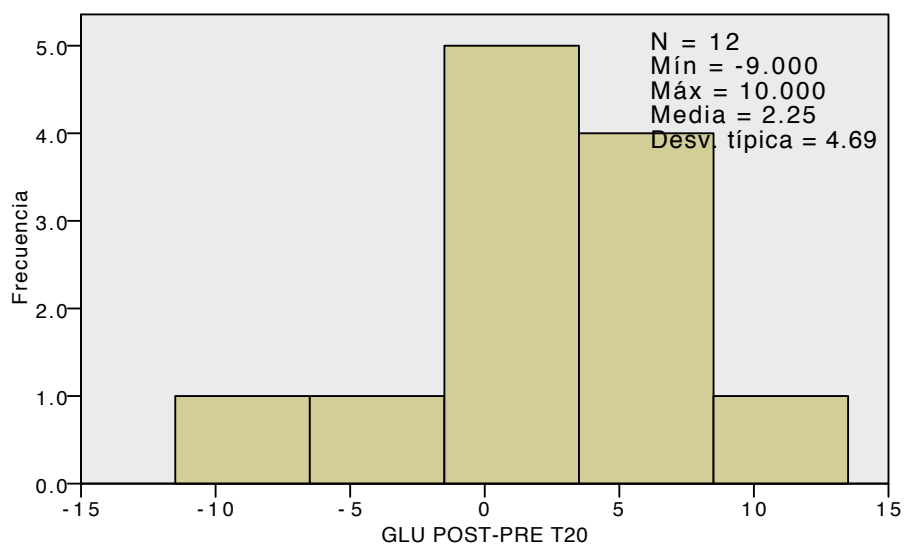

```
*Nonparametric Tests: Related Samples.
NPTESTS
/RELATED TEST(mtDNA.DIF.P mtDNA.DIF.T20) WILCOXON
/MISSING SCOPE=ANALYSIS USERMISSING=EXCLUDE
/CRITERIA ALPHA=0.05 CILEVEL=95.
```

## Pruebas no paramétricas

### Notas

|                           |                                             |                                                                                                                                                           |
|---------------------------|---------------------------------------------|-----------------------------------------------------------------------------------------------------------------------------------------------------------|
| <b>Resultados creados</b> |                                             | 23-MAR-2019 17:42:33                                                                                                                                      |
| <b>Comentarios</b>        |                                             |                                                                                                                                                           |
| <b>Entrada</b>            | <b>Datos</b>                                | /Users/SergioBarroso/Desktop/T20-RAL Reviewers/Base de datos/T20.sav                                                                                      |
|                           | <b>Conjunto de datos activo</b>             | Conjunto_de_datos1                                                                                                                                        |
|                           | <b>Filtro</b>                               | <ninguno>                                                                                                                                                 |
|                           | <b>Peso</b>                                 | <ninguno>                                                                                                                                                 |
|                           | <b>Dividir archivo</b>                      | <ninguno>                                                                                                                                                 |
|                           | <b>Núm. de filas del archivo de trabajo</b> | 12                                                                                                                                                        |
| <b>Sintaxis</b>           |                                             | NPTESTS<br>/RELATED TEST<br>(mtDNA.DIF.P mtDNA.DIF.T20) WILCOXON<br>/MISSING<br>SCOPE=ANALYSIS<br>USERMISSING=EXCLUDE<br>/CRITERIA ALPHA=0.05 CILEVEL=95. |
| <b>Recursos</b>           | <b>Tiempo de procesador</b>                 | 00:00:00.09                                                                                                                                               |
|                           | <b>Tiempo transcurrido</b>                  | 00:00:00.00                                                                                                                                               |

[Conjunto\_de\_datos1] /Users/SergioBarroso/Desktop/T20-RAL Reviewers/Base de datos/T20.sav

### Resumen de prueba de hipótesis

|   | Hipótesis nula                                                                                | Test                                                                | Sig. | Decisión                   |
|---|-----------------------------------------------------------------------------------------------|---------------------------------------------------------------------|------|----------------------------|
| 1 | La mediana de las diferencias entre mtDNA POST-PRE Placebo y mtDNA POST-PRE T20 es igual a 0. | Prueba de Wilcoxon de los rangos con signo de muestras relacionadas | .060 | Retener la hipótesis nula. |

Se muestran las significancias asintóticas. El nivel de significancia es .05.

Prueba de Wilcoxon de los rangos con signo de muestras relacionadas

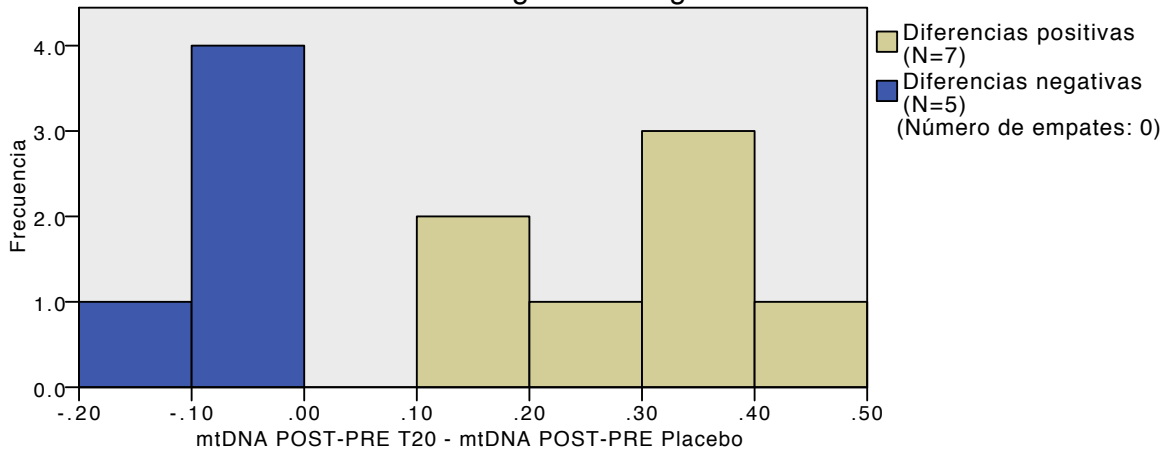

|                                       |        |
|---------------------------------------|--------|
| N total                               | 12     |
| Probar estadística                    | 63.000 |
| Error típico                          | 12.748 |
| Estadística de prueba estandarizada   | 1.883  |
| Sig. asintótica (prueba de dos caras) | .060   |

### Información de campo continuo

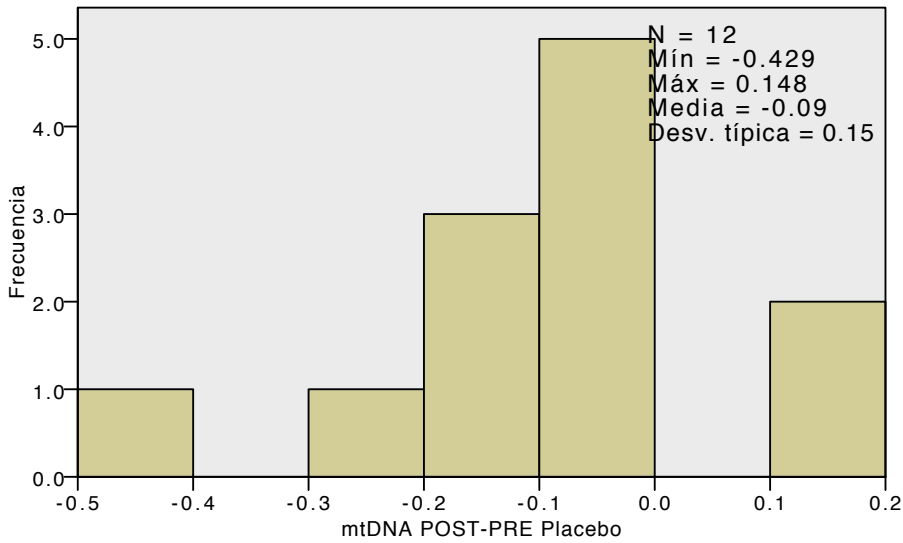

### Información de campo continuo

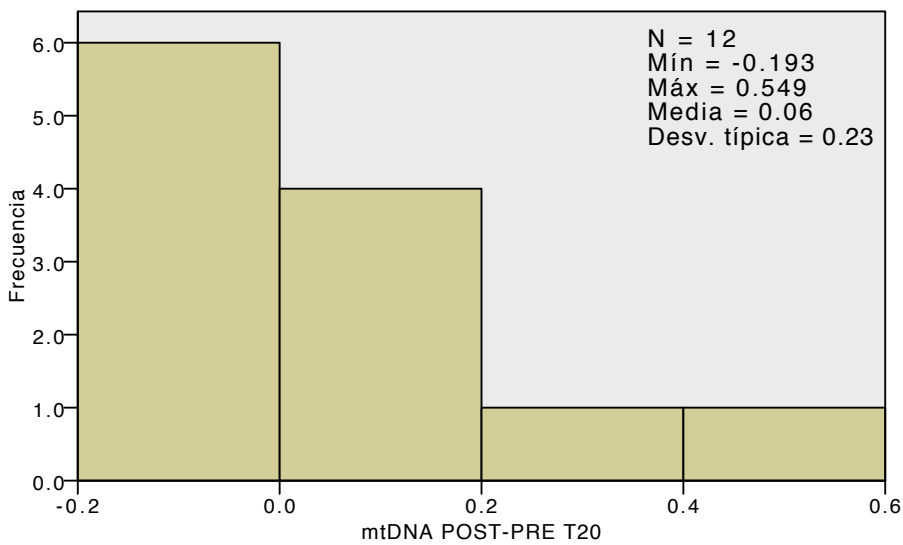

\*Nonparametric Tests: Related Samples.

NPTESTS

/RELATED TEST(CRT.DIF.P CRT.DIF.T20) WILCOXON

/MISSING SCOPE=ANALYSIS USERMISSING=EXCLUDE

/CRITERIA ALPHA=0.05 CILEVEL=95.

## Pruebas no paramétricas

Notas

|                           |                                                                                                                                                              |                                                                      |
|---------------------------|--------------------------------------------------------------------------------------------------------------------------------------------------------------|----------------------------------------------------------------------|
| <b>Resultados creados</b> | 23-MAR-2019 17:42:59                                                                                                                                         |                                                                      |
| <b>Comentarios</b>        |                                                                                                                                                              |                                                                      |
| <b>Entrada</b>            | <b>Datos</b>                                                                                                                                                 | /Users/SergioBarroso/Desktop/T20-RAL Reviewers/Base de datos/T20.sav |
|                           | <b>Conjunto de datos activo</b>                                                                                                                              | Conjunto_de_datos1                                                   |
|                           | <b>Filtro</b>                                                                                                                                                | <ninguno>                                                            |
|                           | <b>Peso</b>                                                                                                                                                  | <ninguno>                                                            |
|                           | <b>Dividir archivo</b>                                                                                                                                       | <ninguno>                                                            |
|                           | <b>Núm. de filas del archivo de trabajo</b>                                                                                                                  | 12                                                                   |
| <b>Sintaxis</b>           | NPTESTS<br>/RELATED TEST(CRT.<br>DIF.P CRT.DIF.T20)<br>WILCOXON<br>/MISSING<br>SCOPE=ANALYSIS<br>USERMISSING=EXCLUDE<br>/CRITERIA ALPHA=0.<br>05 CILEVEL=95. |                                                                      |
| <b>Recursos</b>           | <b>Tiempo de procesador</b>                                                                                                                                  | 00:00:00.20                                                          |
|                           | <b>Tiempo transcurrido</b>                                                                                                                                   | 00:00:00.00                                                          |

[Conjunto\_de\_datos1] /Users/SergioBarroso/Desktop/T20-RAL Reviewers/Base de datos/T20.sav

Resumen de prueba de hipótesis

|   | Hipótesis nula                                                                            | Test                                                                | Sig. | Decisión                   |
|---|-------------------------------------------------------------------------------------------|---------------------------------------------------------------------|------|----------------------------|
| 1 | La mediana de las diferencias entre CRT POST-PRE Placebo y CRT POST-PRE T20 es igual a 0. | Prueba de Wilcoxon de los rangos con signo de muestras relacionadas | .194 | Retener la hipótesis nula. |

Se muestran las significancias asintóticas. El nivel de significancia es .05.



Prueba de Wilcoxon de los rangos con signo de muestras relacionadas

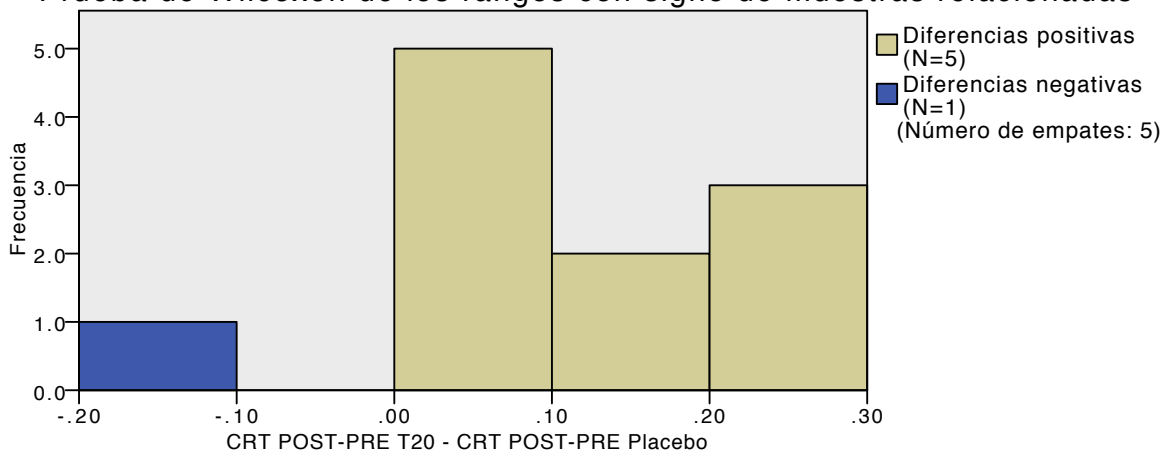

|                                       |        |
|---------------------------------------|--------|
| N total                               | 11     |
| Probar estadística                    | 16.500 |
| Error típico                          | 4.623  |
| Estadística de prueba estandarizada   | 1.298  |
| Sig. asintótica (prueba de dos caras) | .194   |

### Información de campo continuo

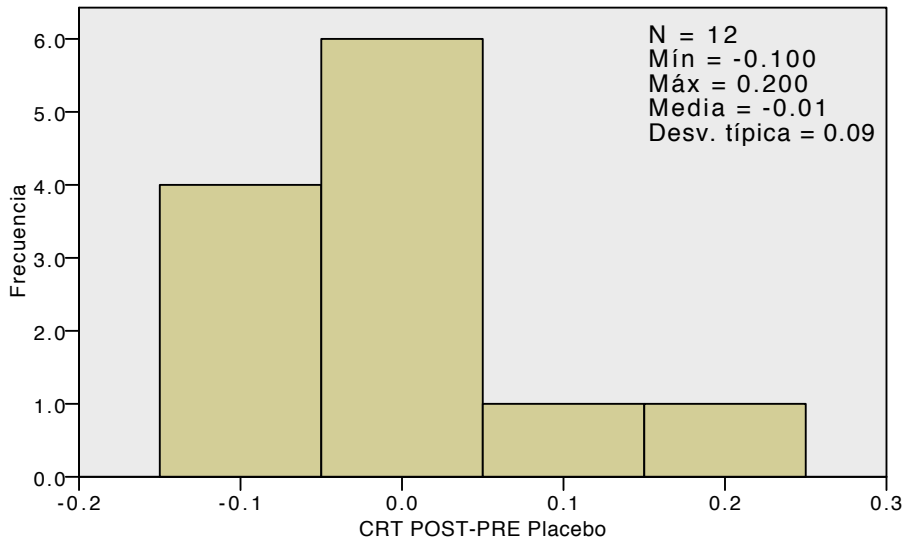

### Información de campo continuo

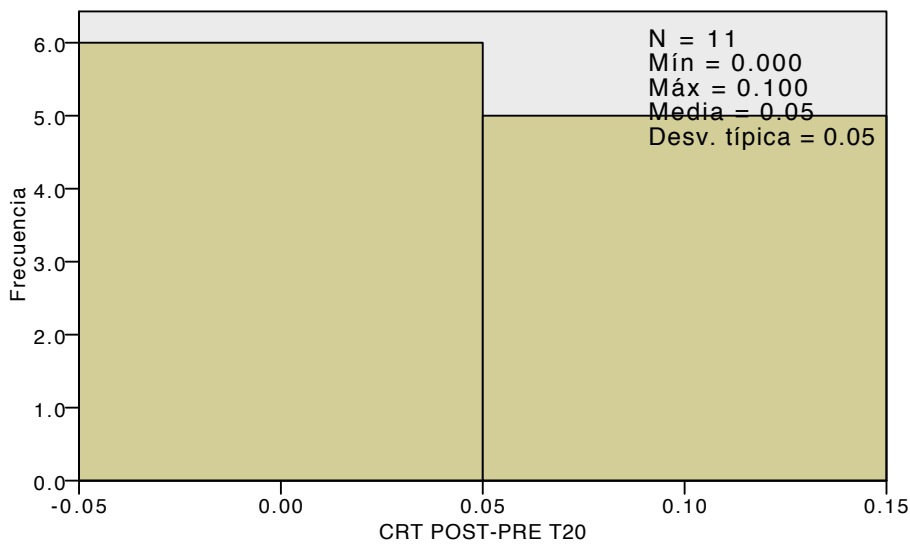

```
*Nonparametric Tests: Related Samples.  
NPTESTS  
/RELATED TEST(AST.DIF.P AST.DIF.T20) WILCOXON  
/MISSING SCOPE=ANALYSIS USERMISSING=EXCLUDE  
/CRITERIA ALPHA=0.05 CILEVEL=95.
```

## Pruebas no paramétricas

### Notas

|                           |                                                                                                                                                              |                                                                      |
|---------------------------|--------------------------------------------------------------------------------------------------------------------------------------------------------------|----------------------------------------------------------------------|
| <b>Resultados creados</b> | 23-MAR-2019 17:43:25                                                                                                                                         |                                                                      |
| <b>Comentarios</b>        |                                                                                                                                                              |                                                                      |
| <b>Entrada</b>            | <b>Datos</b>                                                                                                                                                 | /Users/SergioBarroso/Desktop/T20-RAL Reviewers/Base de datos/T20.sav |
|                           | <b>Conjunto de datos activo</b>                                                                                                                              | Conjunto_de_datos1                                                   |
|                           | <b>Filtro</b>                                                                                                                                                | <ninguno>                                                            |
|                           | <b>Peso</b>                                                                                                                                                  | <ninguno>                                                            |
|                           | <b>Dividir archivo</b>                                                                                                                                       | <ninguno>                                                            |
|                           | <b>Núm. de filas del archivo de trabajo</b>                                                                                                                  | 12                                                                   |
| <b>Sintaxis</b>           | NPTESTS<br>/RELATED TEST(AST.<br>DIF.P AST.DIF.T20)<br>WILCOXON<br>/MISSING<br>SCOPE=ANALYSIS<br>USERMISSING=EXCLUDE<br>/CRITERIA ALPHA=0.<br>05 CILEVEL=95. |                                                                      |
| <b>Recursos</b>           | <b>Tiempo de procesador</b>                                                                                                                                  | 00:00:00.09                                                          |
|                           | <b>Tiempo transcurrido</b>                                                                                                                                   | 00:00:00.00                                                          |

[Conjunto\_de\_datos1] /Users/SergioBarroso/Desktop/T20-RAL Reviewers/Base de datos/T20.sav

### Resumen de prueba de hipótesis

|   | Hipótesis nula                                                                            | Test                                                                | Sig. | Decisión                   |
|---|-------------------------------------------------------------------------------------------|---------------------------------------------------------------------|------|----------------------------|
| 1 | La mediana de las diferencias entre AST POST-PRE Placebo y AST POST-PRE T20 es igual a 0. | Prueba de Wilcoxon de los rangos con signo de muestras relacionadas | .722 | Retener la hipótesis nula. |

Se muestran las significancias asintóticas. El nivel de significancia es .05.

Prueba de Wilcoxon de los rangos con signo de muestras relacionadas

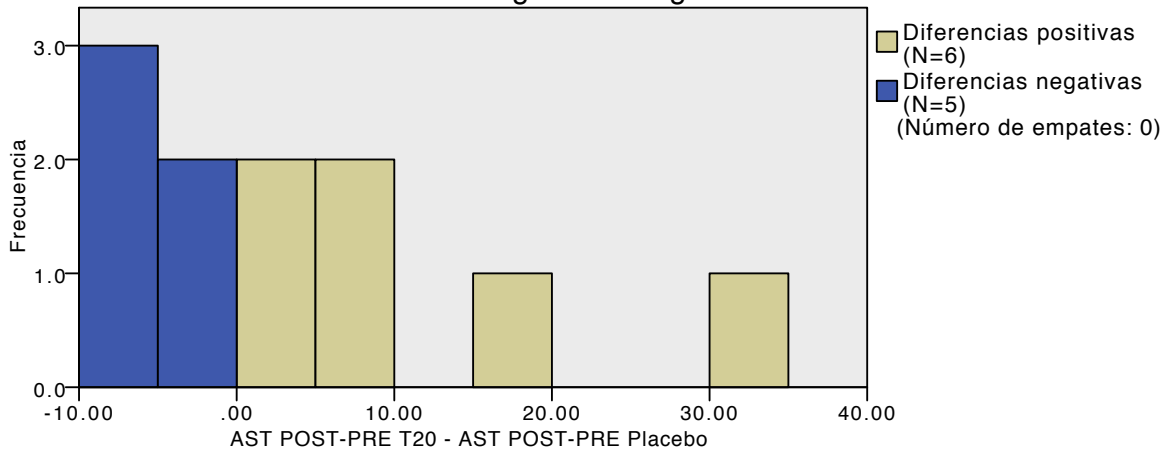

|                                       |        |
|---------------------------------------|--------|
| N total                               | 11     |
| Probar estadística                    | 37.000 |
| Error típico                          | 11.242 |
| Estadística de prueba estandarizada   | .356   |
| Sig. asintótica (prueba de dos caras) | .722   |

### Información de campo continuo

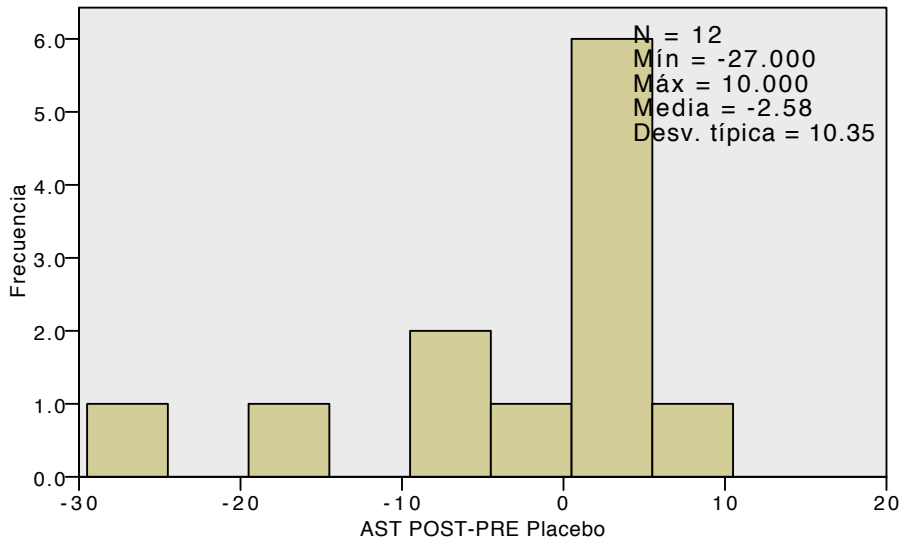

### Información de campo continuo

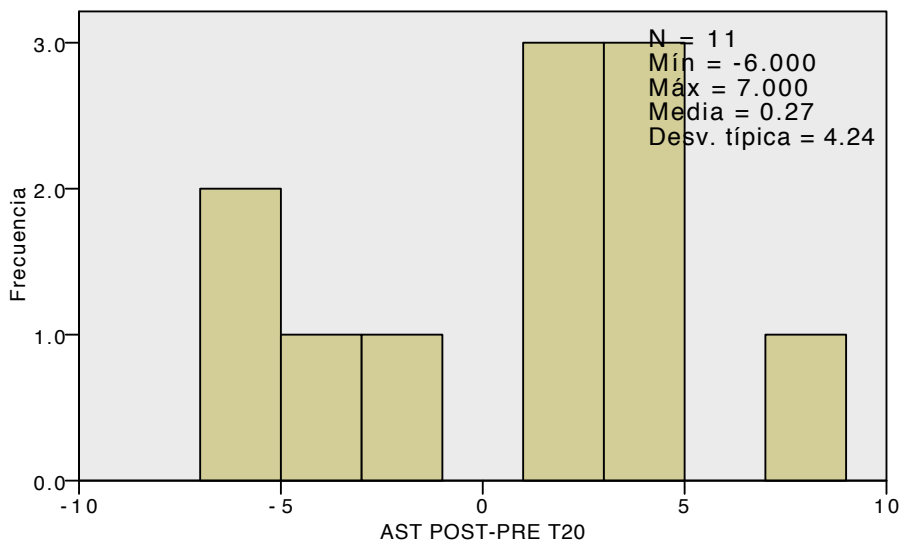

\*Nonparametric Tests: Related Samples.

NPTESTS

/RELATED TEST(ALT.DIF.P ALT.DIF.T20) WILCOXON

/MISSING SCOPE=ANALYSIS USERMISSING=EXCLUDE

/CRITERIA ALPHA=0.05 CILEVEL=95.

## Pruebas no paramétricas

### Notas

|                           |                                             |                                                                                                                                                              |
|---------------------------|---------------------------------------------|--------------------------------------------------------------------------------------------------------------------------------------------------------------|
| <b>Resultados creados</b> |                                             | 23-MAR-2019 17:43:48                                                                                                                                         |
| <b>Comentarios</b>        |                                             |                                                                                                                                                              |
| <b>Entrada</b>            | <b>Datos</b>                                | /Users/SergioBarroso/Desktop/T20-RAL Reviewers/Base de datos/T20.sav                                                                                         |
|                           | <b>Conjunto de datos activo</b>             | Conjunto_de_datos1                                                                                                                                           |
|                           | <b>Filtro</b>                               | <ninguno>                                                                                                                                                    |
|                           | <b>Peso</b>                                 | <ninguno>                                                                                                                                                    |
|                           | <b>Dividir archivo</b>                      | <ninguno>                                                                                                                                                    |
|                           | <b>Núm. de filas del archivo de trabajo</b> | 12                                                                                                                                                           |
| <b>Sintaxis</b>           |                                             | NPTESTS<br>/RELATED TEST(ALT.<br>DIF.P ALT.DIF.T20)<br>WILCOXON<br>/MISSING<br>SCOPE=ANALYSIS<br>USERMISSING=EXCLUDE<br>/CRITERIA ALPHA=0.<br>05 CILEVEL=95. |
| <b>Recursos</b>           | <b>Tiempo de procesador</b>                 | 00:00:00.14                                                                                                                                                  |
|                           | <b>Tiempo transcurrido</b>                  | 00:00:00.00                                                                                                                                                  |

[Conjunto\_de\_datos1] /Users/SergioBarroso/Desktop/T20-RAL Reviewers/Base de datos/T20.sav

### Resumen de prueba de hipótesis

|   | Hipótesis nula                                                                            | Test                                                                | Sig. | Decisión                   |
|---|-------------------------------------------------------------------------------------------|---------------------------------------------------------------------|------|----------------------------|
| 1 | La mediana de las diferencias entre ALT POST-PRE Placebo y ALT POST-PRE T20 es igual a 0. | Prueba de Wilcoxon de los rangos con signo de muestras relacionadas | .192 | Retener la hipótesis nula. |

Se muestran las significancias asintóticas. El nivel de significancia es .05.

Prueba de Wilcoxon de los rangos con signo de muestras relacionadas

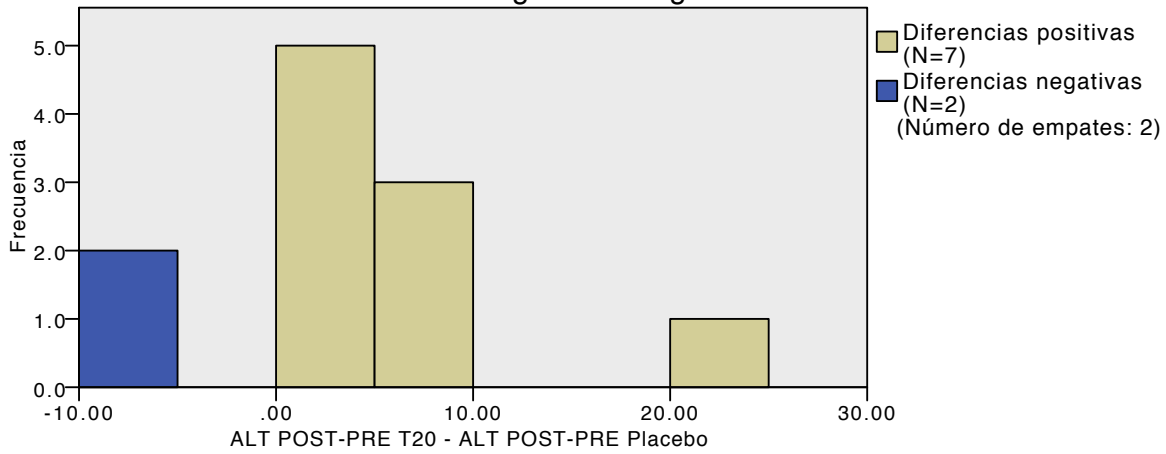

|                                       |        |
|---------------------------------------|--------|
| N total                               | 11     |
| Probar estadística                    | 33.500 |
| Error típico                          | 8.426  |
| Estadística de prueba estandarizada   | 1.305  |
| Sig. asintótica (prueba de dos caras) | .192   |

### Información de campo continuo

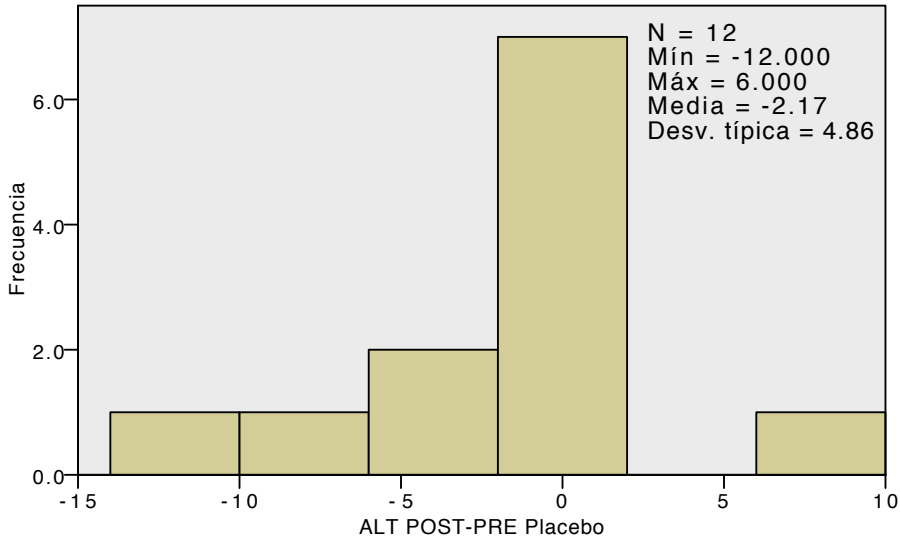

### Información de campo continuo

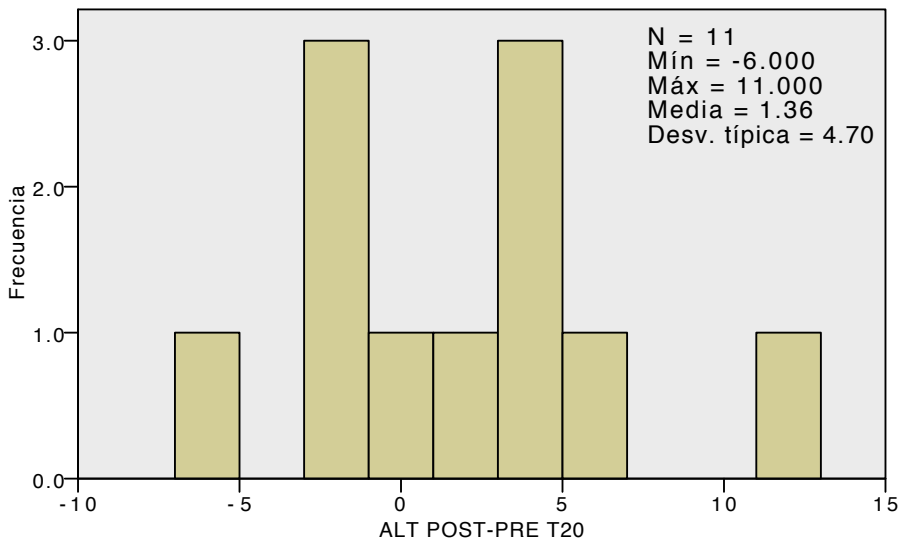

```
*Nonparametric Tests: Related Samples.  
NPTESTS  
/RELATED TEST(BIL.DIF.P BIL.DIF.T20) WILCOXON  
/MISSING SCOPE=ANALYSIS USERMISSING=EXCLUDE  
/CRITERIA ALPHA=0.05 CILEVEL=95.
```

### Pruebas no paramétricas



### Notas

|                           |                                             |                                                                                                                                                              |
|---------------------------|---------------------------------------------|--------------------------------------------------------------------------------------------------------------------------------------------------------------|
| <b>Resultados creados</b> |                                             | 23-MAR-2019 17:44:12                                                                                                                                         |
| <b>Comentarios</b>        |                                             |                                                                                                                                                              |
| <b>Entrada</b>            | <b>Datos</b>                                | /Users/SergioBarroso/Desktop/T20-RAL Reviewers/Base de datos/T20.sav                                                                                         |
|                           | <b>Conjunto de datos activo</b>             | Conjunto_de_datos1                                                                                                                                           |
|                           | <b>Filtro</b>                               | <ninguno>                                                                                                                                                    |
|                           | <b>Peso</b>                                 | <ninguno>                                                                                                                                                    |
|                           | <b>Dividir archivo</b>                      | <ninguno>                                                                                                                                                    |
|                           | <b>Núm. de filas del archivo de trabajo</b> | 12                                                                                                                                                           |
| <b>Sintaxis</b>           |                                             | NPTESTS<br>/RELATED TEST(BIL.<br>DIF.P BIL.DIF.T20)<br>WILCOXON<br>/MISSING<br>SCOPE=ANALYSIS<br>USERMISSING=EXCLUDE<br>/CRITERIA ALPHA=0.<br>05 CILEVEL=95. |
| <b>Recursos</b>           | <b>Tiempo de procesador</b>                 | 00:00:00.10                                                                                                                                                  |
|                           | <b>Tiempo transcurrido</b>                  | 00:00:00.00                                                                                                                                                  |

[Conjunto\_de\_datos1] /Users/SergioBarroso/Desktop/T20-RAL Reviewers/Base de datos/T20.sav

### Resumen de prueba de hipótesis

|   | Hipótesis nula                                                                            | Test                                                                | Sig. | Decisión                   |
|---|-------------------------------------------------------------------------------------------|---------------------------------------------------------------------|------|----------------------------|
| 1 | La mediana de las diferencias entre BIL POST-PRE Placebo y BIL POST-PRE T20 es igual a 0. | Prueba de Wilcoxon de los rangos con signo de muestras relacionadas | .349 | Retener la hipótesis nula. |

Se muestran las significancias asintóticas. El nivel de significancia es .05.

Prueba de Wilcoxon de los rangos con signo de muestras relacionadas

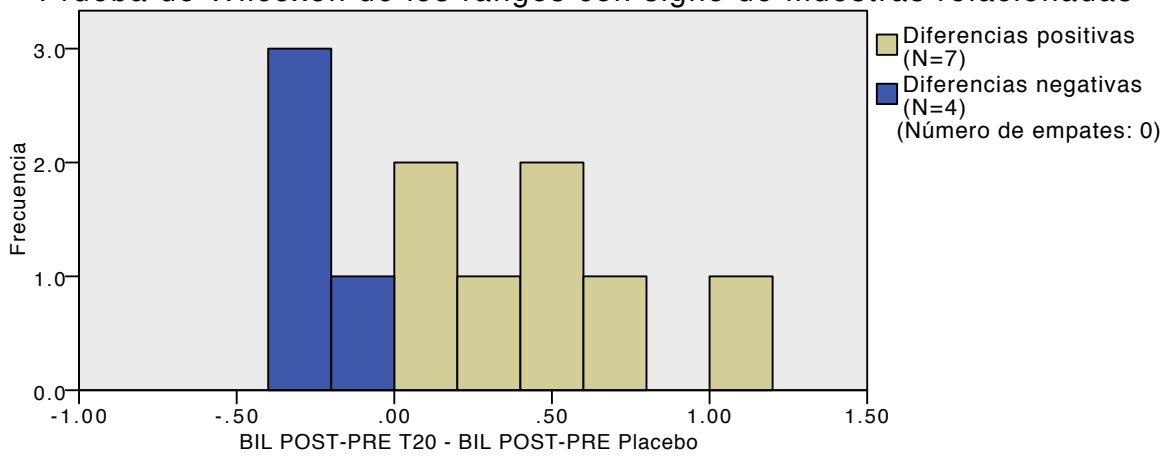

|                                       |        |
|---------------------------------------|--------|
| N total                               | 11     |
| Probar estadística                    | 43.500 |
| Error típico                          | 11.214 |
| Estadística de prueba estandarizada   | .936   |
| Sig. asintótica (prueba de dos caras) | .349   |

### Información de campo continuo

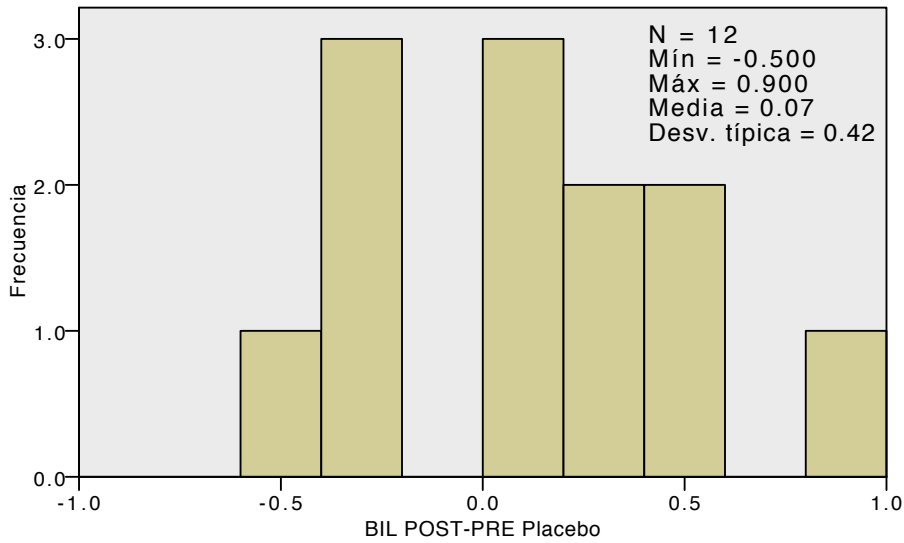

### Información de campo continuo

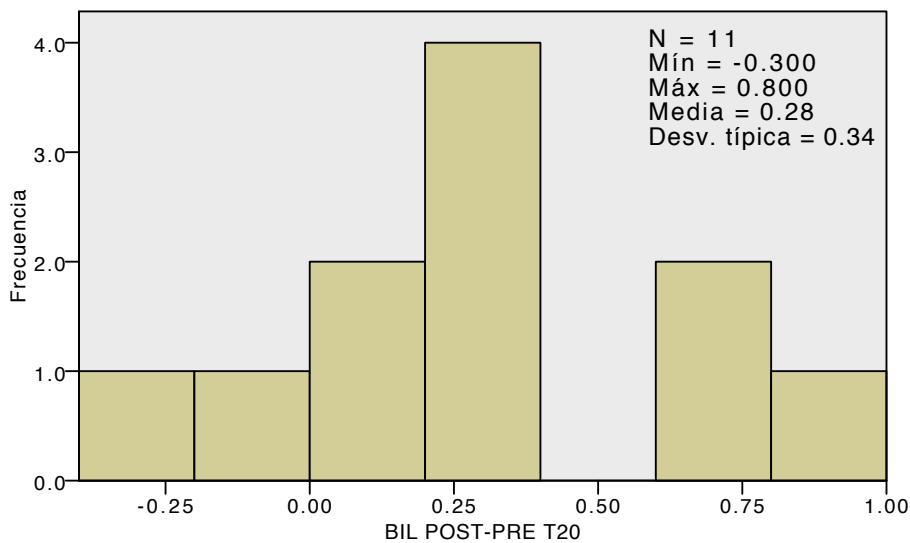

\*Nonparametric Tests: Related Samples.  
NPTESTS  
/RELATED TEST(PROT.DIF.P PROT.DIF.T20) WILCOXON  
/MISSING SCOPE=ANALYSIS USERMISSING=EXCLUDE  
/CRITERIA ALPHA=0.05 CILEVEL=95.

### Pruebas no paramétricas

Notas

|                           |                                                                                                                                                                |                                                                      |
|---------------------------|----------------------------------------------------------------------------------------------------------------------------------------------------------------|----------------------------------------------------------------------|
| <b>Resultados creados</b> | 23-MAR-2019 17:44:28                                                                                                                                           |                                                                      |
| <b>Comentarios</b>        |                                                                                                                                                                |                                                                      |
| <b>Entrada</b>            | <b>Datos</b>                                                                                                                                                   | /Users/SergioBarroso/Desktop/T20-RAL Reviewers/Base de datos/T20.sav |
|                           | <b>Conjunto de datos activo</b>                                                                                                                                | Conjunto_de_datos1                                                   |
|                           | <b>Filtro</b>                                                                                                                                                  | <ninguno>                                                            |
|                           | <b>Peso</b>                                                                                                                                                    | <ninguno>                                                            |
|                           | <b>Dividir archivo</b>                                                                                                                                         | <ninguno>                                                            |
|                           | <b>Núm. de filas del archivo de trabajo</b>                                                                                                                    | 12                                                                   |
| <b>Sintaxis</b>           | NPTESTS<br>/RELATED TEST(PROT.<br>DIF.P PROT.DIF.T20)<br>WILCOXON<br>/MISSING<br>SCOPE=ANALYSIS<br>USERMISSING=EXCLUDE<br>/CRITERIA ALPHA=0.<br>05 CILEVEL=95. |                                                                      |
| <b>Recursos</b>           | <b>Tiempo de procesador</b>                                                                                                                                    | 00:00:00.08                                                          |
|                           | <b>Tiempo transcurrido</b>                                                                                                                                     | 00:00:00.00                                                          |

[Conjunto\_de\_datos1] /Users/SergioBarroso/Desktop/T20-RAL Reviewers/Base de datos/T20.sav

Resumen de prueba de hipótesis

|   | Hipótesis nula                                                                              | Test                                                                | Sig. | Decisión                   |
|---|---------------------------------------------------------------------------------------------|---------------------------------------------------------------------|------|----------------------------|
| 1 | La mediana de las diferencias entre PROT POST-PRE Placebo y PROT POST-PRE T20 es igual a 0. | Prueba de Wilcoxon de los rangos con signo de muestras relacionadas | .473 | Retener la hipótesis nula. |

Se muestran las significancias asintóticas. El nivel de significancia es .05.

Prueba de Wilcoxon de los rangos con signo de muestras relacionadas

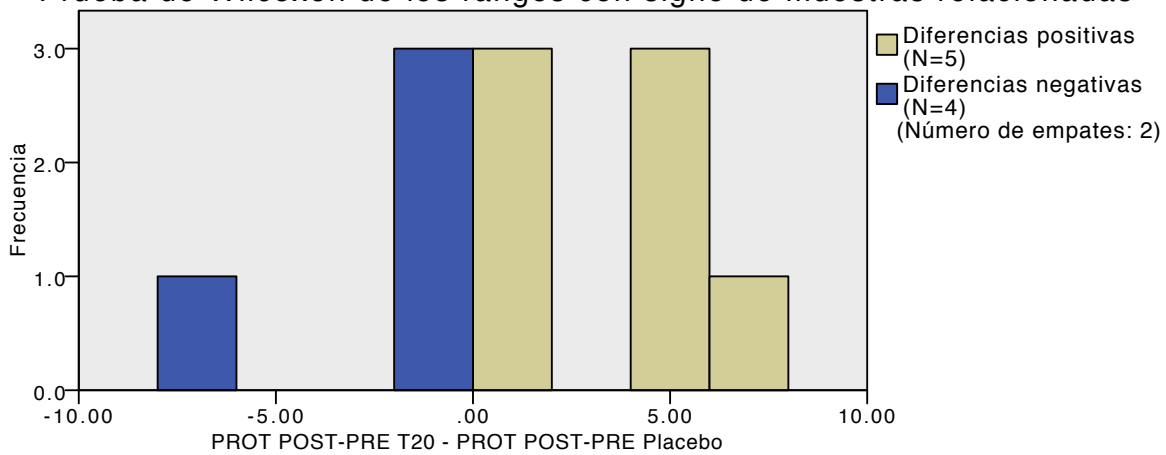

|                                       |        |
|---------------------------------------|--------|
| N total                               | 11     |
| Probar estadística                    | 28.500 |
| Error típico                          | 8.359  |
| Estadística de prueba estandarizada   | .718   |
| Sig. asintótica (prueba de dos caras) | .473   |

### Información de campo continuo

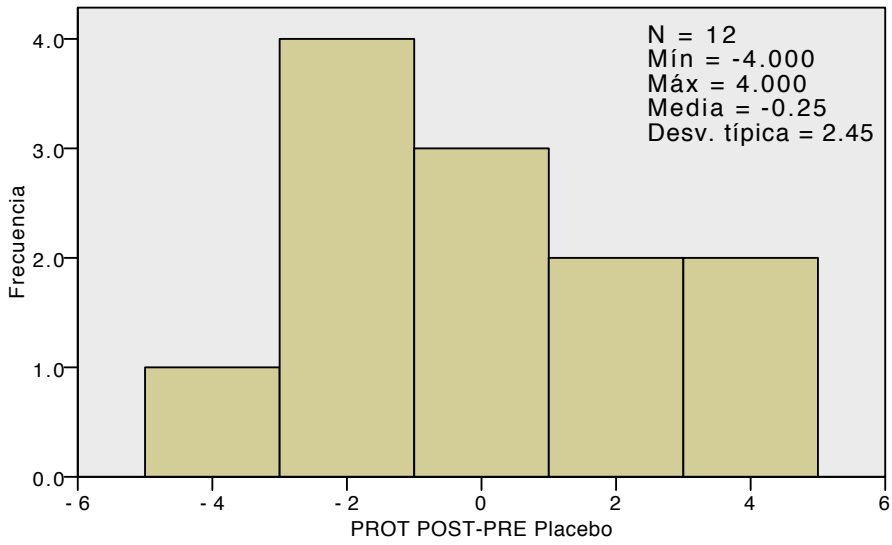

### Información de campo continuo

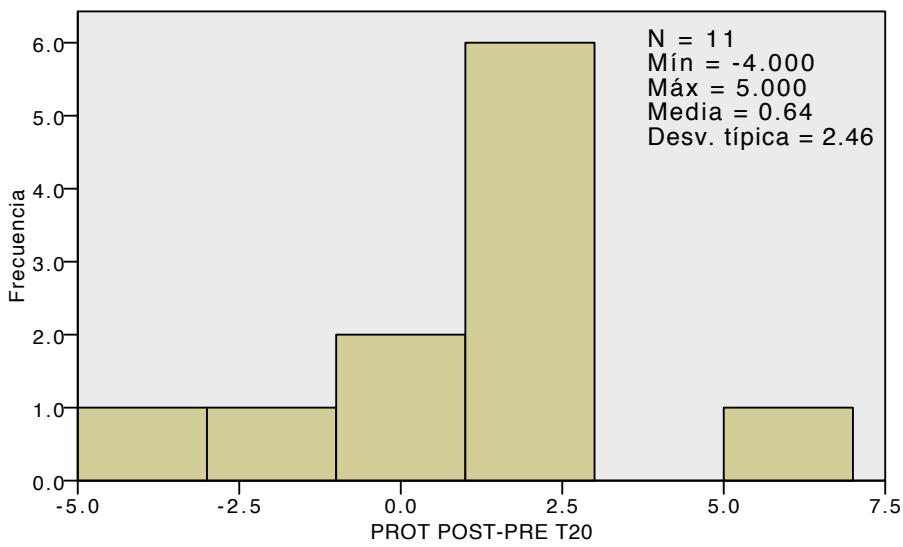

Supplement: pone.0216712.s004.pdf [file pone.0216712.s004.pdf]
