# Supplementary material for: Metabolic, mitochondrial, renal and hepatic safety of enfuvirtide and raltegravir antiretroviral administration: Randomized crossover clinical trial in healthy volunteers
Source: PubMed Central journal article supplement (PMC6532851; doi:10.1371/journal.pone.0216712), 2019-05-23

```

GET
FILE='/Users/SergioBarroso/Desktop/T20-RAL Reviewers/Base de datos/RAL.sav'.
DATASET NAME Conjunto_de_datos1 WINDOW=FRONT.
DESCRIPTIVES VARIABLES=CHOL.PRE.P CHOL.POST.P CHOL.PRE.RAL CHOL.POST.RAL HDL.PRE.P HDL.POST.P I
PRO.POST.P PRO.PRE.RAL PROT.POST.RAL
/STATISTICS=MEAN STDDEV SEMEAN.

```

## Descriptivos

### Notas

|                                             |                                                                                                                                                                                                                                                                                                                                                                                                                                                                                                                                                                                                                                                                                                     |                                                                               |
|---------------------------------------------|-----------------------------------------------------------------------------------------------------------------------------------------------------------------------------------------------------------------------------------------------------------------------------------------------------------------------------------------------------------------------------------------------------------------------------------------------------------------------------------------------------------------------------------------------------------------------------------------------------------------------------------------------------------------------------------------------------|-------------------------------------------------------------------------------|
| <b>Resultados creados</b>                   | 29-MAR-2019 00:35:53                                                                                                                                                                                                                                                                                                                                                                                                                                                                                                                                                                                                                                                                                |                                                                               |
| <b>Comentarios</b>                          |                                                                                                                                                                                                                                                                                                                                                                                                                                                                                                                                                                                                                                                                                                     |                                                                               |
| <b>Entrada</b>                              | <b>Datos</b>                                                                                                                                                                                                                                                                                                                                                                                                                                                                                                                                                                                                                                                                                        | /Users/SergioBarroso/Desktop/T20-RAL Reviewers/Base de datos/RAL.sav          |
|                                             | <b>Conjunto de datos activo</b>                                                                                                                                                                                                                                                                                                                                                                                                                                                                                                                                                                                                                                                                     | Conjunto_de_datos1                                                            |
|                                             | <b>Filtro</b>                                                                                                                                                                                                                                                                                                                                                                                                                                                                                                                                                                                                                                                                                       | <ninguno>                                                                     |
|                                             | <b>Peso</b>                                                                                                                                                                                                                                                                                                                                                                                                                                                                                                                                                                                                                                                                                         | <ninguno>                                                                     |
|                                             | <b>Dividir archivo</b>                                                                                                                                                                                                                                                                                                                                                                                                                                                                                                                                                                                                                                                                              | <ninguno>                                                                     |
|                                             | <b>Núm. de filas del archivo de trabajo</b>                                                                                                                                                                                                                                                                                                                                                                                                                                                                                                                                                                                                                                                         | 14                                                                            |
| <b>Manipulación de los valores perdidos</b> | <b>Definición de los perdidos</b>                                                                                                                                                                                                                                                                                                                                                                                                                                                                                                                                                                                                                                                                   | Los valores perdidos definidos por el usuario son considerados como perdidos. |
|                                             | <b>Casos utilizados</b>                                                                                                                                                                                                                                                                                                                                                                                                                                                                                                                                                                                                                                                                             | Se han utilizado todos los datos no perdidos.                                 |
| <b>Sintaxis</b>                             | DESCRIPTIVES<br>VARIABLES=CHOL.PRE.P<br>CHOL.POST.P CHOL.PRE.<br>RAL CHOL.POST.RAL<br>HDL.PRE.P HDL.POST.P<br>HDL.PRE.RAL HDL.POST.<br>RAL LDL.PRE.P LDL.<br>POST.P LDL.PRE.RAL<br>LDL.POST.RAL TAG.PRE.<br>P TAG.POST.P TAG.PRE.<br>RAL TAG.POST.RAL GLU.<br>PRE.P GLU.POST.P GLU.<br>PRE.RAL GLU.POST.RAL<br>mtDNA.PRE.P mtDNA.<br>POST.P mtDNA.PRE.RAL<br>mtDNA.POST.RAL CRT.<br>PRE.P CRT.POST.P CRT.<br>PRE.RAL CRT.POST.RAL<br>AST.PRE.P AST.POST.P<br>AST.PRE.RAL AST.POST.<br>RAL ALT.PRE.P ALT.<br>POST.P ALT.PRE.RAL<br>ALT.POST.RAL BIL.PRE.P<br>BIL.POST.P BIL.PRE.RAL<br>BIL.POST.RAL PROT.PRE.<br>P<br>PRO.POST.P PRO.PRE.<br>RAL PROT.POST.RAL<br>/STATISTICS=MEAN<br>STDDEV SEMEAN. |                                                                               |
| <b>Recursos</b>                             | <b>Tiempo de procesador</b>                                                                                                                                                                                                                                                                                                                                                                                                                                                                                                                                                                                                                                                                         | 00:00:00.01                                                                   |
|                                             | <b>Tiempo transcurrido</b>                                                                                                                                                                                                                                                                                                                                                                                                                                                                                                                                                                                                                                                                          | 00:00:00.00                                                                   |

[Conjunto\_de\_datos1] /Users/SergioBarroso/Desktop/T20-RAL Reviewers/Base de datos/RAL.sav

Estadísticos descriptivos

|                        | N           | Media       |              | Desv. típ.  |
|------------------------|-------------|-------------|--------------|-------------|
|                        | Estadístico | Estadístico | Error típico | Estadístico |
| CHOL.PRE.P             | 14          | 155.2857    | 7.90703      | 29.58541    |
| CHOL.POST.P            | 14          | 152.7143    | 7.61392      | 28.48867    |
| CHOL.PRE.RAL           | 14          | 152.5714    | 7.69166      | 28.77957    |
| CHOL.POST.RAL          | 14          | 154.3571    | 8.29246      | 31.02755    |
| HDL.PRE.P              | 14          | 50.8571     | 2.53298      | 9.47756     |
| HDL.POST.P             | 14          | 50.9286     | 2.27375      | 8.50759     |
| HDL.PRE.RAL            | 14          | 50.7857     | 2.63572      | 9.86196     |
| HDL.POST.RAL           | 14          | 52.0714     | 2.49717      | 9.34356     |
| LDL.PRE.P              | 14          | 85.7857     | 6.36541      | 23.81718    |
| LDL.POST.P             | 14          | 88.4286     | 6.81120      | 25.48518    |
| LDL.PRE.RAL            | 14          | 79.7143     | 5.59378      | 20.93002    |
| LDL.POST.RAL           | 14          | 88.8571     | 7.57734      | 28.35179    |
| TAG.PRE.P              | 14          | 92.7857     | 14.51001     | 54.29149    |
| TAG.POST.P             | 14          | 66.6429     | 7.19936      | 26.93755    |
| TAG.PRE.RAL            | 14          | 110.1429    | 22.25202     | 83.25943    |
| TAG.POST.RAL           | 14          | 67.6429     | 7.19096      | 26.90612    |
| GLU.PRE.P              | 14          | 87.4286     | 2.22551      | 8.32710     |
| GLU.POST.P             | 14          | 87.7143     | 1.36046      | 5.09039     |
| GLU.PRE.RAL            | 14          | 87.7857     | 1.50887      | 5.64567     |
| GLU.POST.RAL           | 14          | 85.0714     | 1.76182      | 6.59212     |
| mtDNA.PRE.P            | 14          | 1.7474      | .15065       | .56369      |
| mtDNA.POST.P           | 14          | 1.9171      | .15601       | .58373      |
| mtDNA.PRE.RAL          | 14          | 1.7625      | .16524       | .61827      |
| mtDNA.POST.RAL         | 14          | 1.9960      | .16727       | .62588      |
| CRT.PRE.P              | 14          | .9893       | .01820       | .06810      |
| CRT.POST.P             | 14          | 1.0164      | .02517       | .09419      |
| CRT.PRE.RAL            | 14          | .9986       | .02265       | .08475      |
| CRT.POST.RAL           | 14          | 1.0200      | .02169       | .08115      |
| AST.PRE.P              | 14          | 23.9286     | 1.23797      | 4.63207     |
| AST.POST.P             | 14          | 23.9286     | 1.25122      | 4.68162     |
| AST.PRE.RAL            | 14          | 28.0714     | 3.37161      | 12.61540    |
| AST.POST.RAL           | 14          | 26.5714     | 2.91022      | 10.88905    |
| ALT.PRE.P              | 14          | 25.0714     | 2.46618      | 9.22759     |
| ALT.POST.P             | 14          | 26.2143     | 3.43092      | 12.83732    |
| ALT.PRE.RAL            | 14          | 28.0714     | 4.11839      | 15.40961    |
| ALT.POST.RAL           | 14          | 25.7143     | 1.90554      | 7.12988     |
| BIL.PRE.P              | 14          | .6929       | .08546       | .31977      |
| BIL.POST.P             | 14          | .7643       | .07079       | .26489      |
| BIL.PRE.RAL            | 14          | .7143       | .08042       | .30091      |
| BIL.POST.RAL           | 14          | .8286       | .09913       | .37092      |
| PROT.PRE.P             | 14          | 74.7143     | .84794       | 3.17269     |
| PRO.POST.P             | 13          | 75.0000     | .63043       | 2.27303     |
| PRO.PRE.RAL            | 14          | 73.2857     | .87347       | 3.26823     |
| PROT.POST.RAL          | 14          | 75.4286     | .95339       | 3.56725     |
| N válido (según lista) | 13          |             |              |             |

```
EXECUTE.
*Nonparametric Tests: Related Samples.
NPTESTS
  /RELATED TEST(CHOL.PRE.P CHOL.PRE.RAL) WILCOXON
  /MISSING SCOPE=ANALYSIS USERMISSING=EXCLUDE
  /CRITERIA ALPHA=0.05 CILEVEL=95.
```

## Pruebas no paramétricas

### Notas

|                           |                                                                                                                                                        |                                                                      |
|---------------------------|--------------------------------------------------------------------------------------------------------------------------------------------------------|----------------------------------------------------------------------|
| <b>Resultados creados</b> | 23-MAR-2019 18:09:54                                                                                                                                   |                                                                      |
| <b>Comentarios</b>        |                                                                                                                                                        |                                                                      |
| <b>Entrada</b>            | <b>Datos</b>                                                                                                                                           |                                                                      |
|                           |                                                                                                                                                        | /Users/SergioBarroso/Desktop/T20-RAL Reviewers/Base de datos/RAL.sav |
|                           | <b>Conjunto de datos activo</b>                                                                                                                        | Conjunto_de_datos2                                                   |
|                           | <b>Filtro</b>                                                                                                                                          | <ninguno>                                                            |
|                           | <b>Peso</b>                                                                                                                                            | <ninguno>                                                            |
|                           | <b>Dividir archivo</b>                                                                                                                                 | <ninguno>                                                            |
|                           | <b>Núm. de filas del archivo de trabajo</b>                                                                                                            | 14                                                                   |
| <b>Sintaxis</b>           | NPTESTS<br>/RELATED TEST(CHOL.PRE.P CHOL.PRE.RAL)<br>WILCOXON<br>/MISSING<br>SCOPE=ANALYSIS<br>USERMISSING=EXCLUDE<br>/CRITERIA ALPHA=0.05 CILEVEL=95. |                                                                      |
| <b>Recursos</b>           | <b>Tiempo de procesador</b>                                                                                                                            | 00:00:00.08                                                          |
|                           | <b>Tiempo transcurrido</b>                                                                                                                             | 00:00:00.00                                                          |

[Conjunto\_de\_datos2] /Users/SergioBarroso/Desktop/T20-RAL Reviewers/Base de datos/RAL.sav

### Resumen de prueba de hipótesis

|   | Hipótesis nula                                                              | Test                                                                | Sig. | Decisión                   |
|---|-----------------------------------------------------------------------------|---------------------------------------------------------------------|------|----------------------------|
| 1 | La mediana de las diferencias entre CHOL.PRE.P y CHOL.PRE.RAL es igual a 0. | Prueba de Wilcoxon de los rangos con signo de muestras relacionadas | .366 | Retener la hipótesis nula. |

Se muestran las significancias asintóticas. El nivel de significancia es .05.

Prueba de Wilcoxon de los rangos con signo de muestras relacionadas

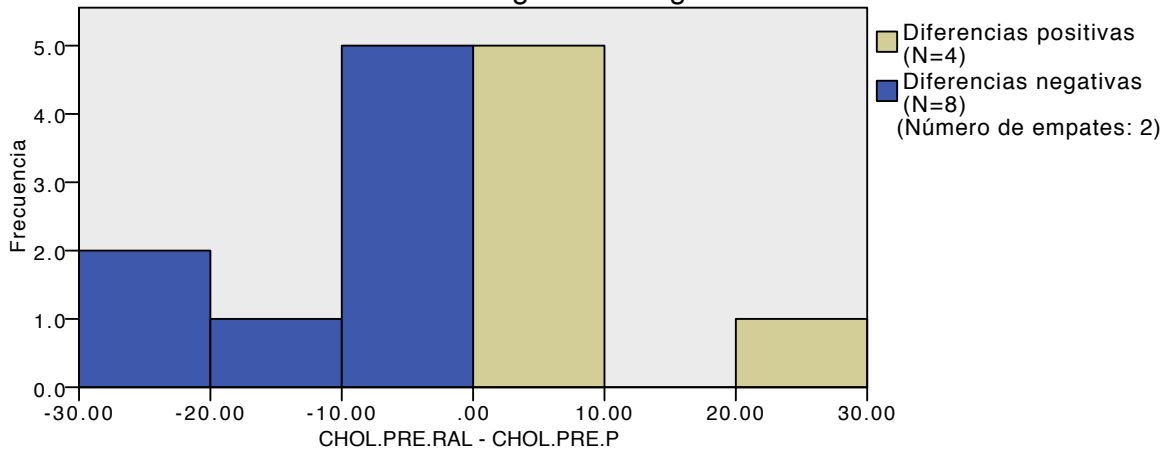

|                                       |        |
|---------------------------------------|--------|
| N total                               | 14     |
| Probar estadística                    | 27.500 |
| Error típico                          | 12.733 |
| Estadística de prueba estandarizada   | -.903  |
| Sig. asintótica (prueba de dos caras) | .366   |

### Información de campo continuo

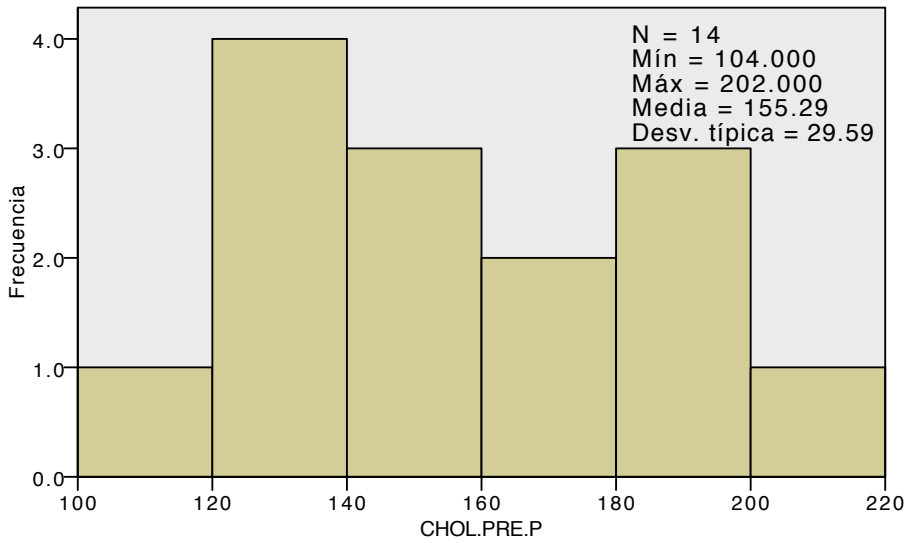

### Información de campo continuo

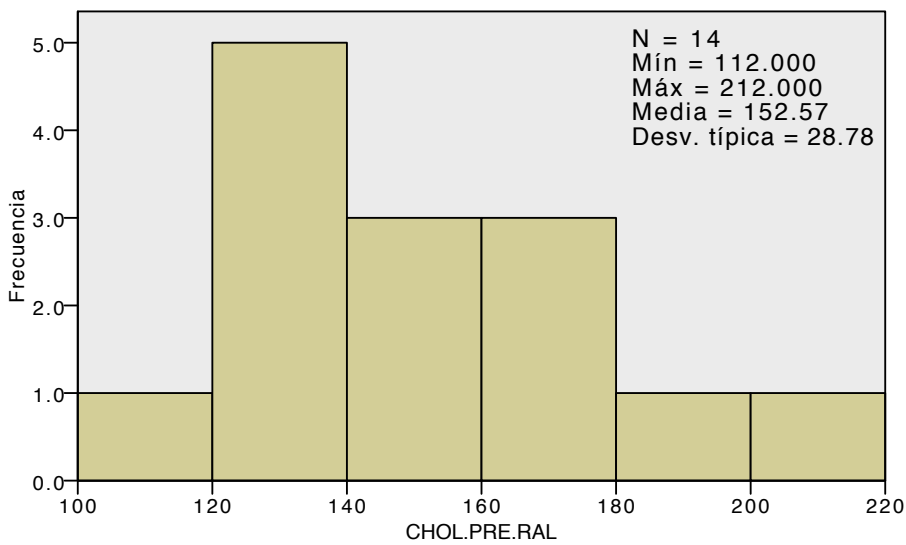

\*Nonparametric Tests: Related Samples.  
NPTESTS  
/RELATED TEST(HDL.PRE.P HDL.PRE.RAL) WILCOXON  
/MISSING SCOPE=ANALYSIS USERMISSING=EXCLUDE  
/CRITERIA ALPHA=0.05 CILEVEL=95.

### Pruebas no paramétricas

### Notas

|                           |                                             |                                                                                                                                                      |
|---------------------------|---------------------------------------------|------------------------------------------------------------------------------------------------------------------------------------------------------|
| <b>Resultados creados</b> |                                             | 23-MAR-2019 18:10:17                                                                                                                                 |
| <b>Comentarios</b>        |                                             |                                                                                                                                                      |
| <b>Entrada</b>            | <b>Datos</b>                                | /Users/SergioBarroso/Desktop/T20-RAL Reviewers/Base de datos/RAL.sav                                                                                 |
|                           | <b>Conjunto de datos activo</b>             | Conjunto_de_datos2                                                                                                                                   |
|                           | <b>Filtro</b>                               | <ninguno>                                                                                                                                            |
|                           | <b>Peso</b>                                 | <ninguno>                                                                                                                                            |
|                           | <b>Dividir archivo</b>                      | <ninguno>                                                                                                                                            |
|                           | <b>Núm. de filas del archivo de trabajo</b> | 14                                                                                                                                                   |
| <b>Sintaxis</b>           |                                             | NPTESTS<br>/RELATED TEST(HDL.PRE.P HDL.PRE.RAL)<br>WILCOXON<br>/MISSING<br>SCOPE=ANALYSIS<br>USERMISSING=EXCLUDE<br>/CRITERIA ALPHA=0.05 CILEVEL=95. |
| <b>Recursos</b>           | <b>Tiempo de procesador</b>                 | 00:00:00.10                                                                                                                                          |
|                           | <b>Tiempo transcurrido</b>                  | 00:00:00.00                                                                                                                                          |

[Conjunto\_de\_datos2] /Users/SergioBarroso/Desktop/T20-RAL Reviewers/Base de datos/RAL.sav

### Resumen de prueba de hipótesis

|   | Hipótesis nula                                                            | Test                                                                | Sig. | Decisión                   |
|---|---------------------------------------------------------------------------|---------------------------------------------------------------------|------|----------------------------|
| 1 | La mediana de las diferencias entre HDL.PRE.P y HDL.PRE.RAL es igual a 0. | Prueba de Wilcoxon de los rangos con signo de muestras relacionadas | .779 | Retener la hipótesis nula. |

Se muestran las significancias asintóticas. El nivel de significancia es .05.

Prueba de Wilcoxon de los rangos con signo de muestras relacionadas

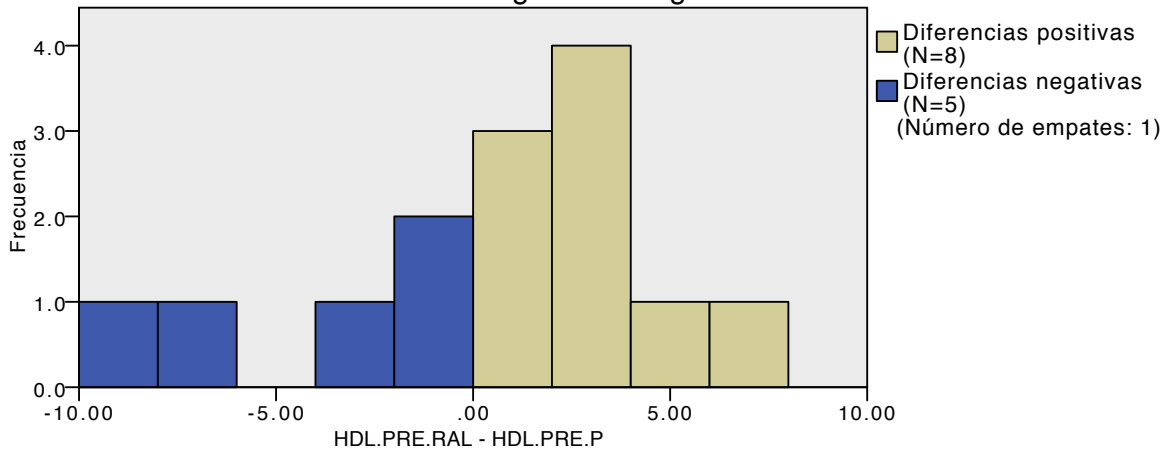

|                                       |        |
|---------------------------------------|--------|
| N total                               | 14     |
| Probar estadística                    | 49.500 |
| Error típico                          | 14.265 |
| Estadística de prueba estandarizada   | .280   |
| Sig. asintótica (prueba de dos caras) | .779   |

### Información de campo continuo

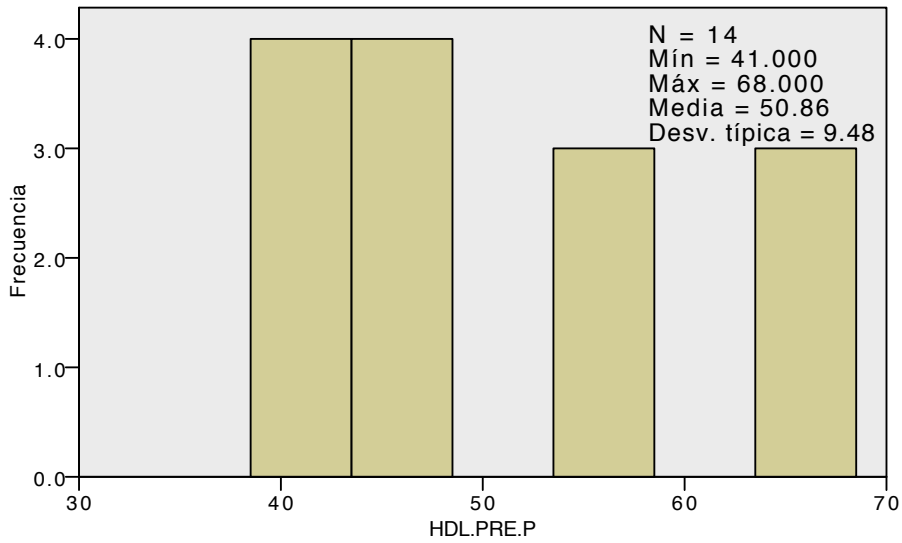

### Información de campo continuo

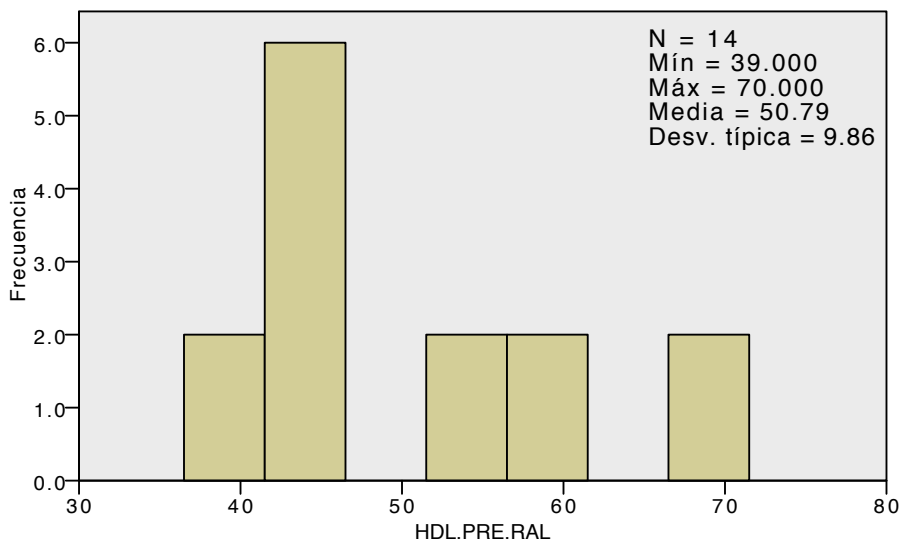

```
*Nonparametric Tests: Related Samples.  
NPTESTS  
/RELATED TEST(LDL.PRE.P LDL.PRE.RAL) WILCOXON  
/MISSING SCOPE=ANALYSIS USERMISSING=EXCLUDE  
/CRITERIA ALPHA=0.05 CILEVEL=95.
```

### Pruebas no paramétricas



### Notas

|                           |                                             |                                                                                                                                                      |
|---------------------------|---------------------------------------------|------------------------------------------------------------------------------------------------------------------------------------------------------|
| <b>Resultados creados</b> |                                             | 23-MAR-2019 18:10:41                                                                                                                                 |
| <b>Comentarios</b>        |                                             |                                                                                                                                                      |
| <b>Entrada</b>            | <b>Datos</b>                                | /Users/SergioBarroso/Desktop/T20-RAL Reviewers/Base de datos/RAL.sav                                                                                 |
|                           | <b>Conjunto de datos activo</b>             | Conjunto_de_datos2                                                                                                                                   |
|                           | <b>Filtro</b>                               | <ninguno>                                                                                                                                            |
|                           | <b>Peso</b>                                 | <ninguno>                                                                                                                                            |
|                           | <b>Dividir archivo</b>                      | <ninguno>                                                                                                                                            |
|                           | <b>Núm. de filas del archivo de trabajo</b> | 14                                                                                                                                                   |
| <b>Sintaxis</b>           |                                             | NPTESTS<br>/RELATED TEST(LDL.PRE.P LDL.PRE.RAL)<br>WILCOXON<br>/MISSING<br>SCOPE=ANALYSIS<br>USERMISSING=EXCLUDE<br>/CRITERIA ALPHA=0.05 CILEVEL=95. |
| <b>Recursos</b>           | <b>Tiempo de procesador</b>                 | 00:00:00.07                                                                                                                                          |
|                           | <b>Tiempo transcurrido</b>                  | 00:00:00.00                                                                                                                                          |

[Conjunto\_de\_datos2] /Users/SergioBarroso/Desktop/T20-RAL Reviewers/Base de datos/RAL.sav

### Resumen de prueba de hipótesis

|   | Hipótesis nula                                                            | Test                                                                | Sig. | Decisión                   |
|---|---------------------------------------------------------------------------|---------------------------------------------------------------------|------|----------------------------|
| 1 | La mediana de las diferencias entre LDL.PRE.P y LDL.PRE.RAL es igual a 0. | Prueba de Wilcoxon de los rangos con signo de muestras relacionadas | .220 | Retener la hipótesis nula. |

Se muestran las significancias asintóticas. El nivel de significancia es .05.

Prueba de Wilcoxon de los rangos con signo de muestras relacionadas

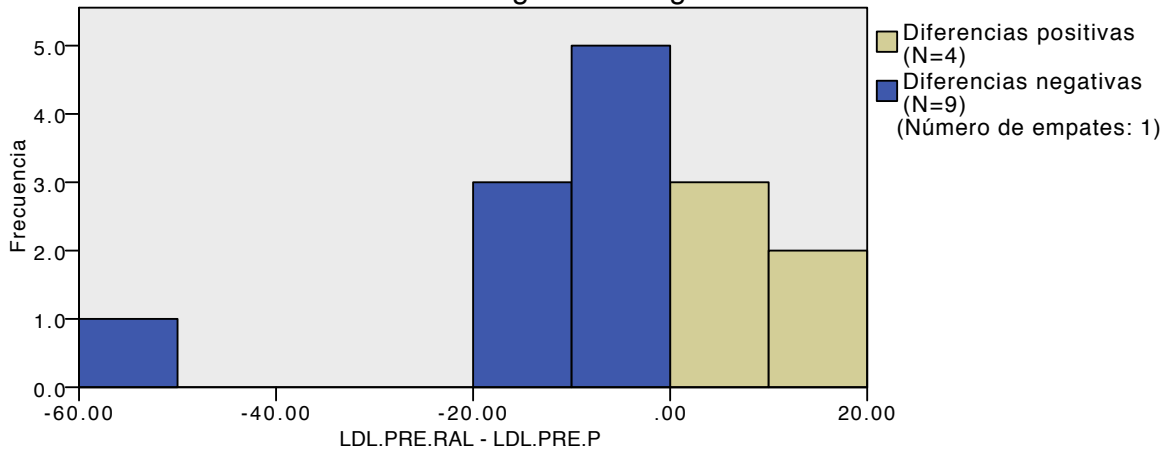

|                                       |        |
|---------------------------------------|--------|
| N total                               | 14     |
| Probar estadística                    | 28.000 |
| Error típico                          | 14.283 |
| Estadística de prueba estandarizada   | -1.225 |
| Sig. asintótica (prueba de dos caras) | .220   |

### Información de campo continuo

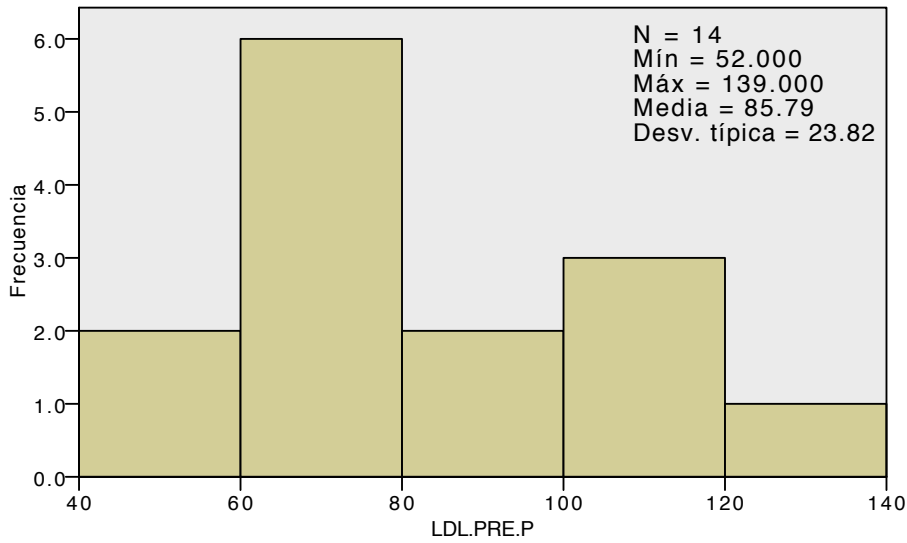

### Información de campo continuo

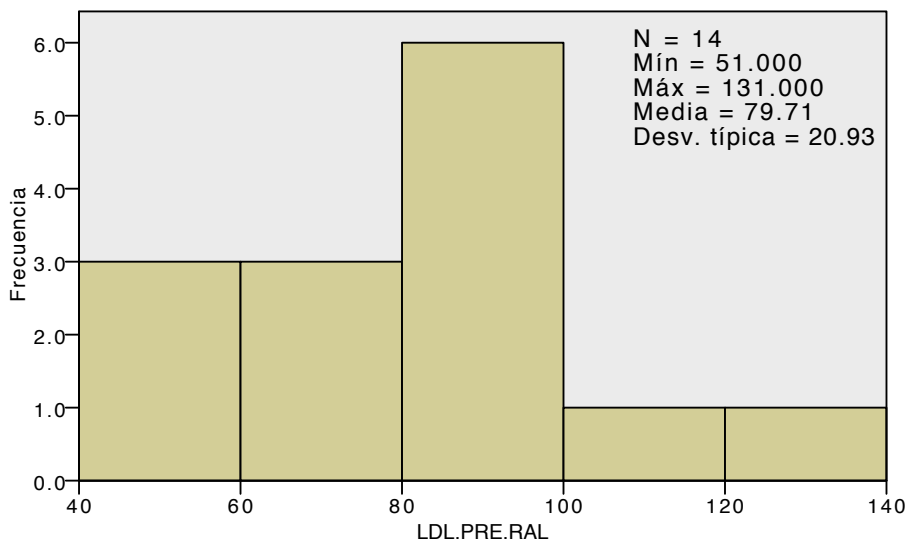

\*Nonparametric Tests: Related Samples.  
NPTESTS  
/RELATED TEST(TAG.PRE.P TAG.PRE.RAL) WILCOXON  
/MISSING SCOPE=ANALYSIS USERMISSING=EXCLUDE  
/CRITERIA ALPHA=0.05 CILEVEL=95.

### Pruebas no paramétricas

### Notas

|                           |                                             |                                                                                                                                                              |
|---------------------------|---------------------------------------------|--------------------------------------------------------------------------------------------------------------------------------------------------------------|
| <b>Resultados creados</b> |                                             | 23-MAR-2019 18:11:05                                                                                                                                         |
| <b>Comentarios</b>        |                                             |                                                                                                                                                              |
| <b>Entrada</b>            | <b>Datos</b>                                | /Users/SergioBarroso/Desktop/T20-RAL Reviewers/Base de datos/RAL.sav                                                                                         |
|                           | <b>Conjunto de datos activo</b>             | Conjunto_de_datos2                                                                                                                                           |
|                           | <b>Filtro</b>                               | <ninguno>                                                                                                                                                    |
|                           | <b>Peso</b>                                 | <ninguno>                                                                                                                                                    |
|                           | <b>Dividir archivo</b>                      | <ninguno>                                                                                                                                                    |
|                           | <b>Núm. de filas del archivo de trabajo</b> | 14                                                                                                                                                           |
| <b>Sintaxis</b>           |                                             | NPTESTS<br>/RELATED TEST(TAG.<br>PRE.P TAG.PRE.RAL)<br>WILCOXON<br>/MISSING<br>SCOPE=ANALYSIS<br>USERMISSING=EXCLUDE<br>/CRITERIA ALPHA=0.<br>05 CILEVEL=95. |
| <b>Recursos</b>           | <b>Tiempo de procesador</b>                 | 00:00:00.07                                                                                                                                                  |
|                           | <b>Tiempo transcurrido</b>                  | 00:00:00.00                                                                                                                                                  |

[Conjunto\_de\_datos2] /Users/SergioBarroso/Desktop/T20-RAL Reviewers/Base de datos/RAL.sav

### Resumen de prueba de hipótesis

|   | Hipótesis nula                                                             | Test                                                                | Sig. | Decisión                   |
|---|----------------------------------------------------------------------------|---------------------------------------------------------------------|------|----------------------------|
| 1 | La mediana de las diferencias entre TAG.PRE.P y TAG.PRE. RAL es igual a 0. | Prueba de Wilcoxon de los rangos con signo de muestras relacionadas | .510 | Retener la hipótesis nula. |

Se muestran las significancias asintóticas. El nivel de significancia es .05.

Prueba de Wilcoxon de los rangos con signo de muestras relacionadas

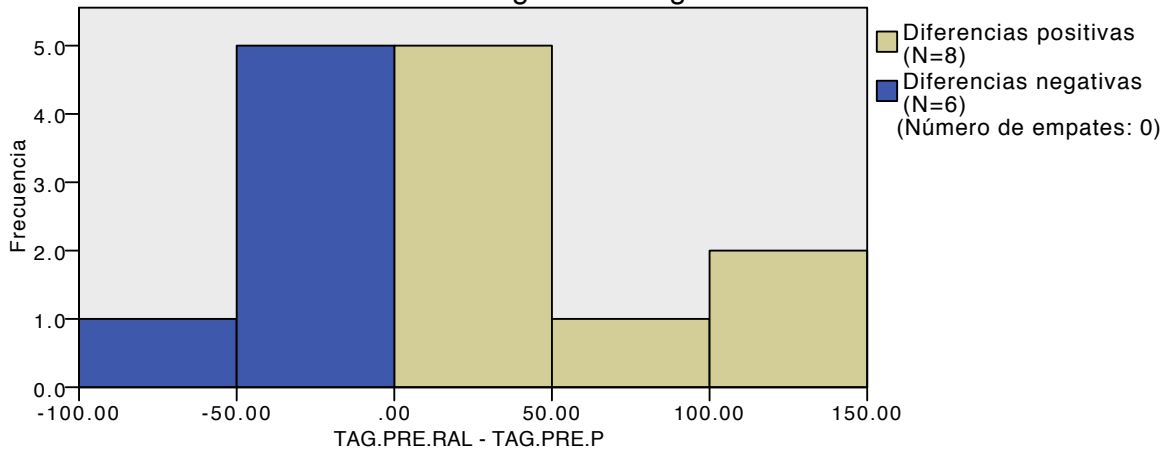

|                                       |        |
|---------------------------------------|--------|
| N total                               | 14     |
| Probar estadística                    | 63.000 |
| Error típico                          | 15.930 |
| Estadística de prueba estandarizada   | .659   |
| Sig. asintótica (prueba de dos caras) | .510   |

### Información de campo continuo

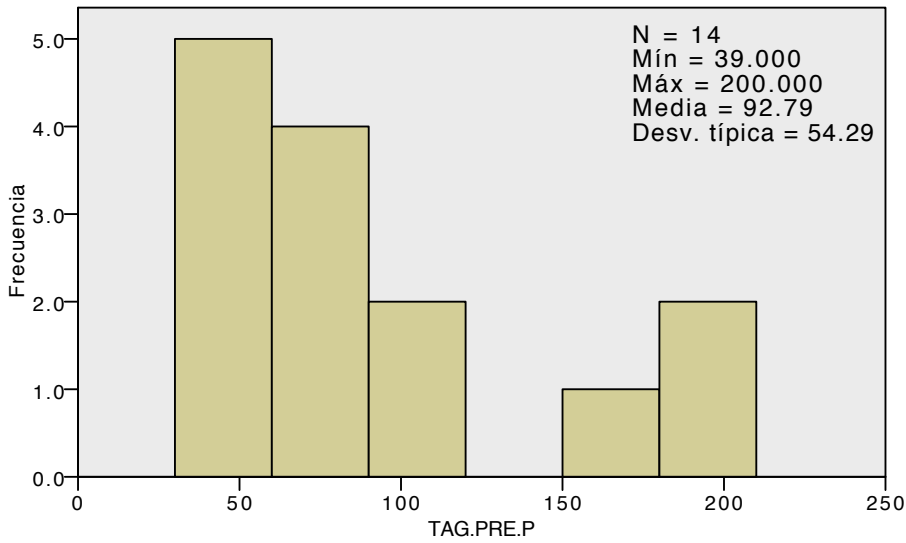

### Información de campo continuo

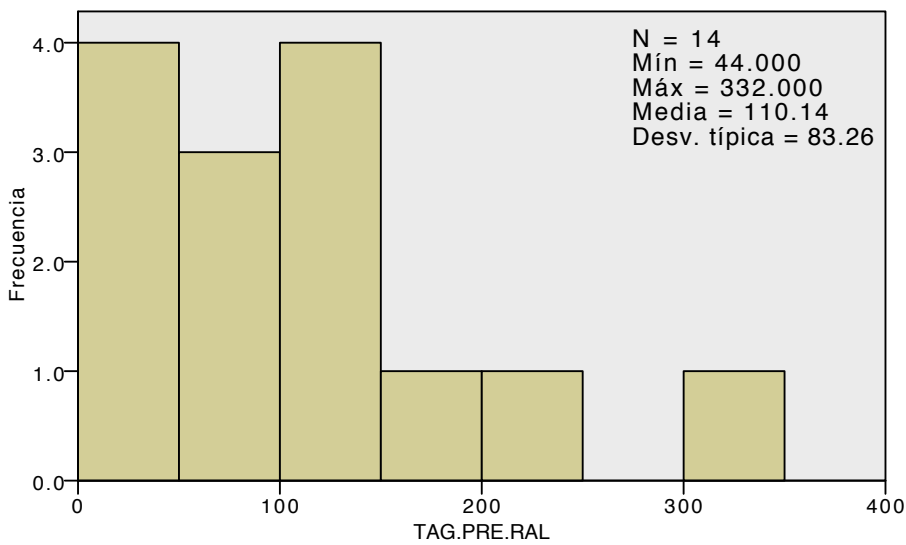

```
*Nonparametric Tests: Related Samples.  
NPTESTS  
/RELATED TEST(GLU.PRE.P GLU.PRE.RAL) WILCOXON  
/MISSING SCOPE=ANALYSIS USERMISSING=EXCLUDE  
/CRITERIA ALPHA=0.05 CILEVEL=95.
```

### Pruebas no paramétricas

### Notas

|                           |                                             |                                                                                                                                                              |
|---------------------------|---------------------------------------------|--------------------------------------------------------------------------------------------------------------------------------------------------------------|
| <b>Resultados creados</b> |                                             | 23-MAR-2019 18:11:35                                                                                                                                         |
| <b>Comentarios</b>        |                                             |                                                                                                                                                              |
| <b>Entrada</b>            | <b>Datos</b>                                | /Users/SergioBarroso/Desktop/T20-RAL Reviewers/Base de datos/RAL.sav                                                                                         |
|                           | <b>Conjunto de datos activo</b>             | Conjunto_de_datos2                                                                                                                                           |
|                           | <b>Filtro</b>                               | <ninguno>                                                                                                                                                    |
|                           | <b>Peso</b>                                 | <ninguno>                                                                                                                                                    |
|                           | <b>Dividir archivo</b>                      | <ninguno>                                                                                                                                                    |
|                           | <b>Núm. de filas del archivo de trabajo</b> | 14                                                                                                                                                           |
| <b>Sintaxis</b>           |                                             | NPTESTS<br>/RELATED TEST(GLU.<br>PRE.P GLU.PRE.RAL)<br>WILCOXON<br>/MISSING<br>SCOPE=ANALYSIS<br>USERMISSING=EXCLUDE<br>/CRITERIA ALPHA=0.<br>05 CILEVEL=95. |
| <b>Recursos</b>           | <b>Tiempo de procesador</b>                 | 00:00:00.08                                                                                                                                                  |
|                           | <b>Tiempo transcurrido</b>                  | 00:00:00.00                                                                                                                                                  |

[Conjunto\_de\_datos2] /Users/SergioBarroso/Desktop/T20-RAL Reviewers/Base de datos/RAL.sav

### Resumen de prueba de hipótesis

|   | Hipótesis nula                                                            | Test                                                                | Sig. | Decisión                   |
|---|---------------------------------------------------------------------------|---------------------------------------------------------------------|------|----------------------------|
| 1 | La mediana de las diferencias entre GLU.PRE.P y GLU.PRE.RAL es igual a 0. | Prueba de Wilcoxon de los rangos con signo de muestras relacionadas | .972 | Retener la hipótesis nula. |

Se muestran las significancias asintóticas. El nivel de significancia es .05.

Prueba de Wilcoxon de los rangos con signo de muestras relacionadas

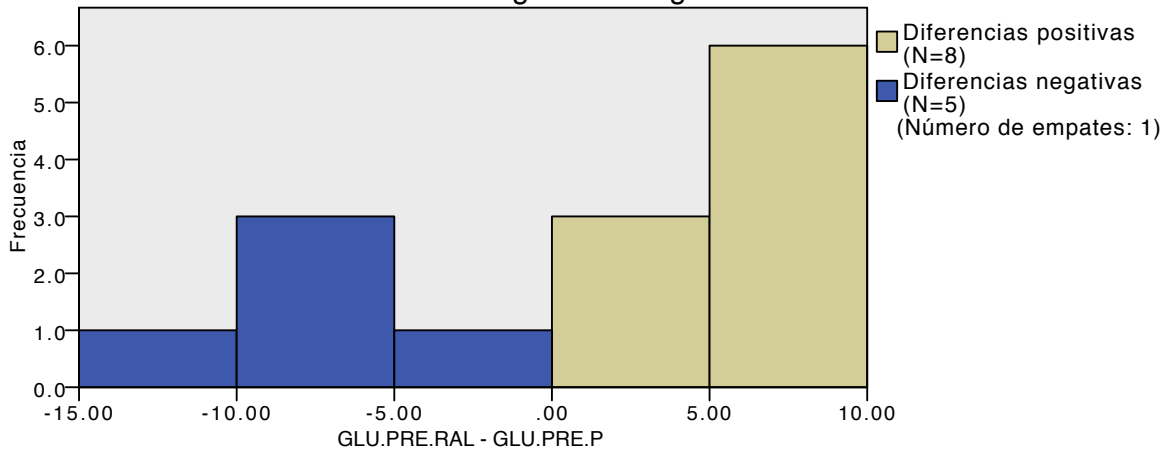

|                                       |        |
|---------------------------------------|--------|
| N total                               | 14     |
| Probar estadística                    | 46.000 |
| Error típico                          | 14.257 |
| Estadística de prueba estandarizada   | .035   |
| Sig. asintótica (prueba de dos caras) | .972   |



### Información de campo continuo

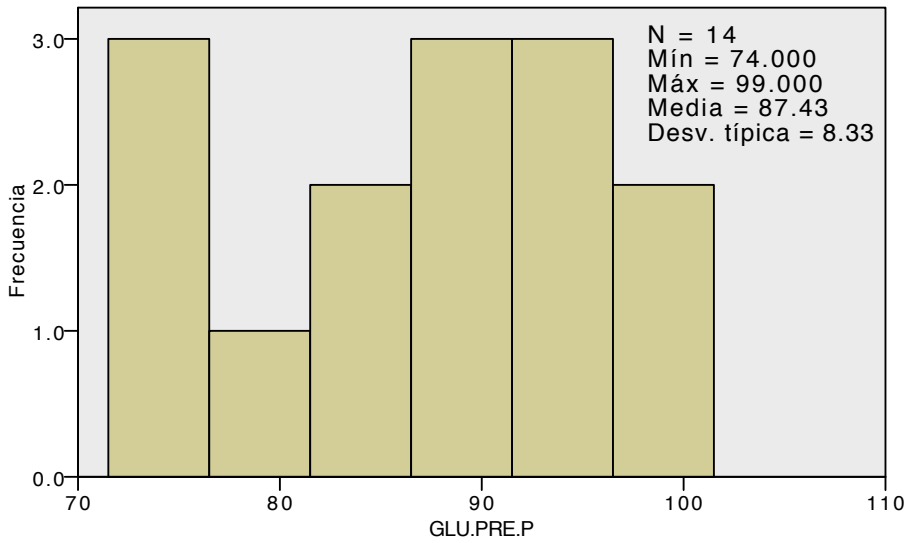

### Información de campo continuo

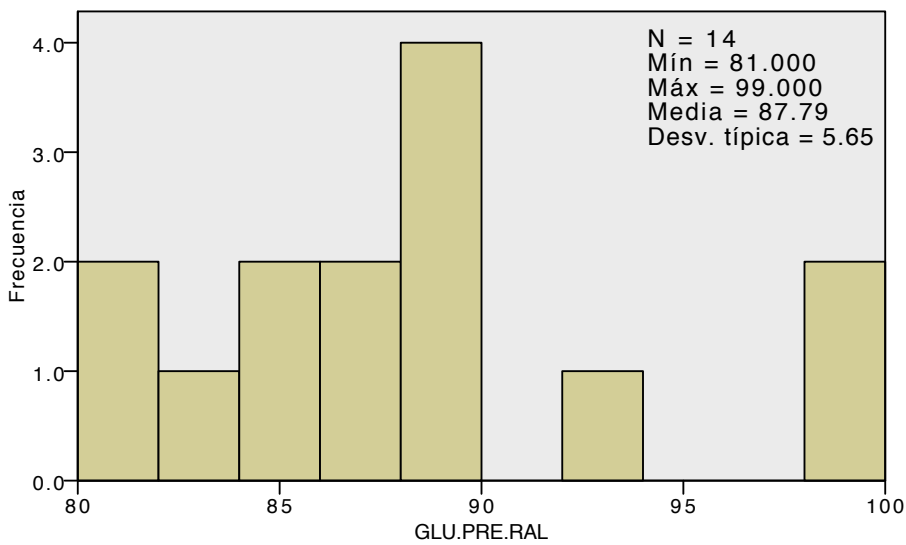

\*Nonparametric Tests: Related Samples.

NPTESTS

/RELATED TEST(mtDNA.PRE.P mtDNA.PRE.RAL) WILCOXON

/MISSING SCOPE=ANALYSIS USERMISSING=EXCLUDE

/CRITERIA ALPHA=0.05 CILEVEL=95.

## Pruebas no paramétricas

### Notas

|                           |                                                                                                                                                           |                                                                      |
|---------------------------|-----------------------------------------------------------------------------------------------------------------------------------------------------------|----------------------------------------------------------------------|
| <b>Resultados creados</b> | 23-MAR-2019 18:12:07                                                                                                                                      |                                                                      |
| <b>Comentarios</b>        |                                                                                                                                                           |                                                                      |
| <b>Entrada</b>            | <b>Datos</b>                                                                                                                                              | /Users/SergioBarroso/Desktop/T20-RAL Reviewers/Base de datos/RAL.sav |
|                           | <b>Conjunto de datos activo</b>                                                                                                                           | Conjunto_de_datos2                                                   |
|                           | <b>Filtro</b>                                                                                                                                             | <ninguno>                                                            |
|                           | <b>Peso</b>                                                                                                                                               | <ninguno>                                                            |
|                           | <b>Dividir archivo</b>                                                                                                                                    | <ninguno>                                                            |
|                           | <b>Núm. de filas del archivo de trabajo</b>                                                                                                               | 14                                                                   |
| <b>Sintaxis</b>           | NPTESTS<br>/RELATED TEST<br>(mtDNA.PRE.P mtDNA.PRE.RAL) WILCOXON<br>/MISSING<br>SCOPE=ANALYSIS<br>USERMISSING=EXCLUDE<br>/CRITERIA ALPHA=0.05 CILEVEL=95. |                                                                      |
| <b>Recursos</b>           | <b>Tiempo de procesador</b>                                                                                                                               | 00:00:00.08                                                          |
|                           | <b>Tiempo transcurrido</b>                                                                                                                                | 00:00:00.00                                                          |

[Conjunto\_de\_datos2] /Users/SergioBarroso/Desktop/T20-RAL Reviewers/Base de datos/RAL.sav

### Resumen de prueba de hipótesis

|   | Hipótesis nula                                                                | Test                                                                | Sig. | Decisión                   |
|---|-------------------------------------------------------------------------------|---------------------------------------------------------------------|------|----------------------------|
| 1 | La mediana de las diferencias entre mtDNA.PRE.P y mtDNA.PRE.RAL es igual a 0. | Prueba de Wilcoxon de los rangos con signo de muestras relacionadas | .975 | Retener la hipótesis nula. |

Se muestran las significancias asintóticas. El nivel de significancia es .05.

Prueba de Wilcoxon de los rangos con signo de muestras relacionadas

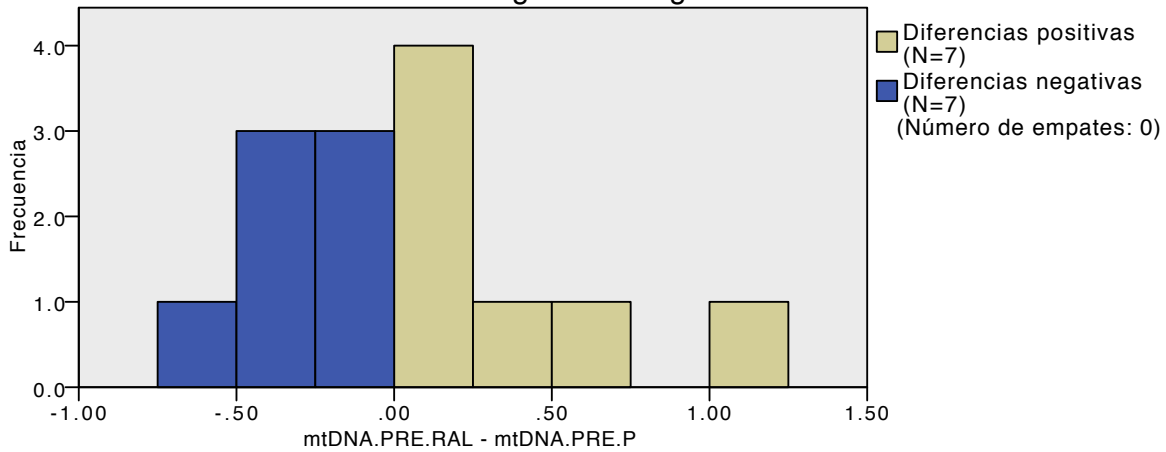

|                                       |        |
|---------------------------------------|--------|
| N total                               | 14     |
| Probar estadística                    | 53.000 |
| Error típico                          | 15.930 |
| Estadística de prueba estandarizada   | .031   |
| Sig. asintótica (prueba de dos caras) | .975   |

### Información de campo continuo

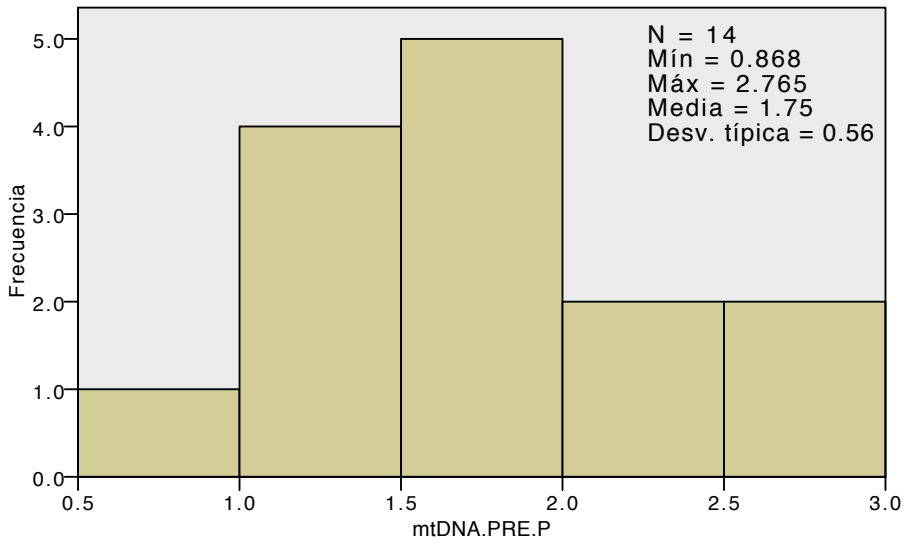

### Información de campo continuo

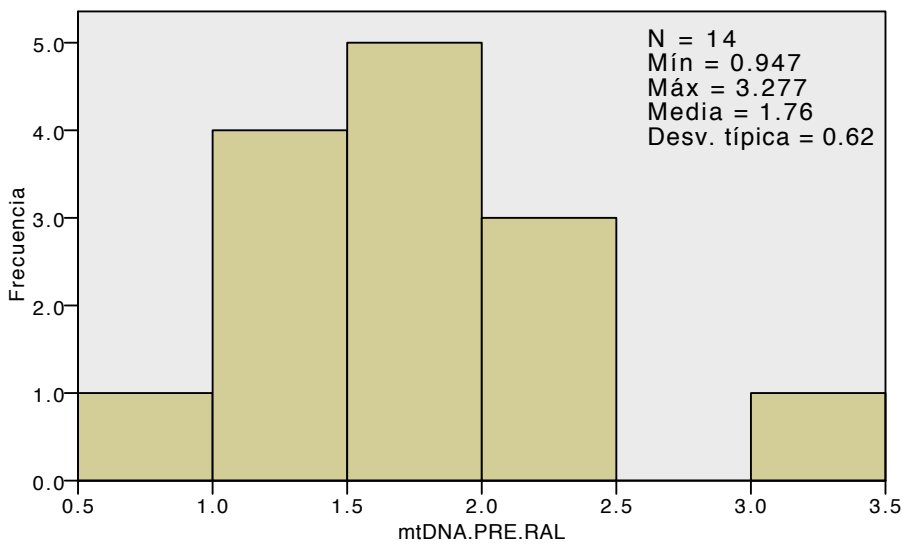

\*Nonparametric Tests: Related Samples.

NPTESTS

/RELATED TEST(CRT.PRE.P CRT.PRE.RAL) WILCOXON

/MISSING SCOPE=ANALYSIS USERMISSING=EXCLUDE

/CRITERIA ALPHA=0.05 CILEVEL=95.

## Pruebas no paramétricas

Notas

|                           |                                                                                                                                                      |                                                                      |
|---------------------------|------------------------------------------------------------------------------------------------------------------------------------------------------|----------------------------------------------------------------------|
| <b>Resultados creados</b> | 23-MAR-2019 18:12:25                                                                                                                                 |                                                                      |
| <b>Comentarios</b>        |                                                                                                                                                      |                                                                      |
| <b>Entrada</b>            | <b>Datos</b>                                                                                                                                         | /Users/SergioBarroso/Desktop/T20-RAL Reviewers/Base de datos/RAL.sav |
|                           | <b>Conjunto de datos activo</b>                                                                                                                      | Conjunto_de_datos2                                                   |
|                           | <b>Filtro</b>                                                                                                                                        | <ninguno>                                                            |
|                           | <b>Peso</b>                                                                                                                                          | <ninguno>                                                            |
|                           | <b>Dividir archivo</b>                                                                                                                               | <ninguno>                                                            |
|                           | <b>Núm. de filas del archivo de trabajo</b>                                                                                                          | 14                                                                   |
| <b>Sintaxis</b>           | NPTESTS<br>/RELATED TEST(CRT.PRE.P CRT.PRE.RAL)<br>WILCOXON<br>/MISSING<br>SCOPE=ANALYSIS<br>USERMISSING=EXCLUDE<br>/CRITERIA ALPHA=0.05 CILEVEL=95. |                                                                      |
| <b>Recursos</b>           | <b>Tiempo de procesador</b>                                                                                                                          | 00:00:00.07                                                          |
|                           | <b>Tiempo transcurrido</b>                                                                                                                           | 00:00:00.00                                                          |

[Conjunto\_de\_datos2] /Users/SergioBarroso/Desktop/T20-RAL Reviewers/Base de datos/RAL.sav

Resumen de prueba de hipótesis

|   | Hipótesis nula                                                            | Test                                                                | Sig. | Decisión                   |
|---|---------------------------------------------------------------------------|---------------------------------------------------------------------|------|----------------------------|
| 1 | La mediana de las diferencias entre CRT.PRE.P y CRT.PRE.RAL es igual a 0. | Prueba de Wilcoxon de los rangos con signo de muestras relacionadas | .925 | Retener la hipótesis nula. |

Se muestran las significancias asintóticas. El nivel de significancia es .05.

Prueba de Wilcoxon de los rangos con signo de muestras relacionadas

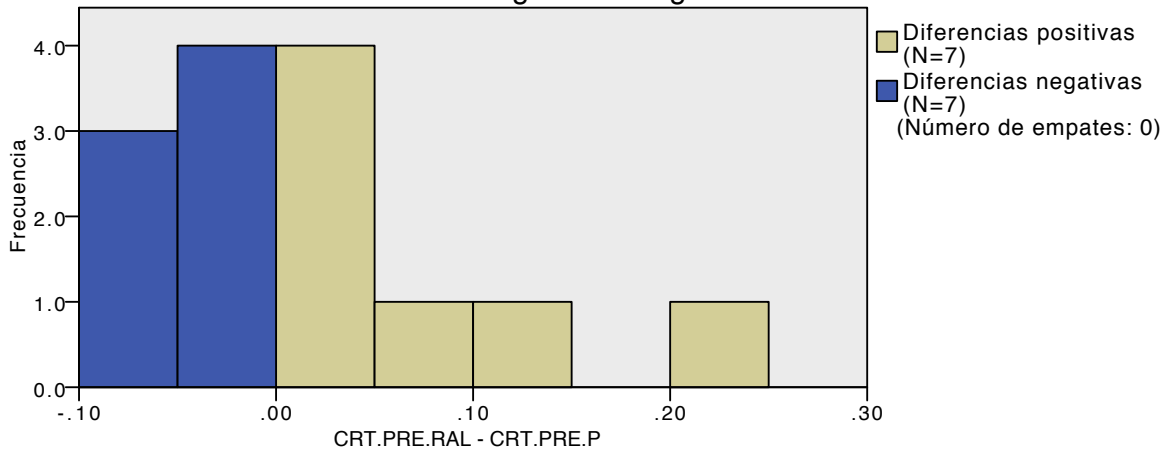

|                                       |        |
|---------------------------------------|--------|
| N total                               | 14     |
| Probar estadística                    | 51.000 |
| Error típico                          | 15.882 |
| Estadística de prueba estandarizada   | -.094  |
| Sig. asintótica (prueba de dos caras) | .925   |

### Información de campo continuo

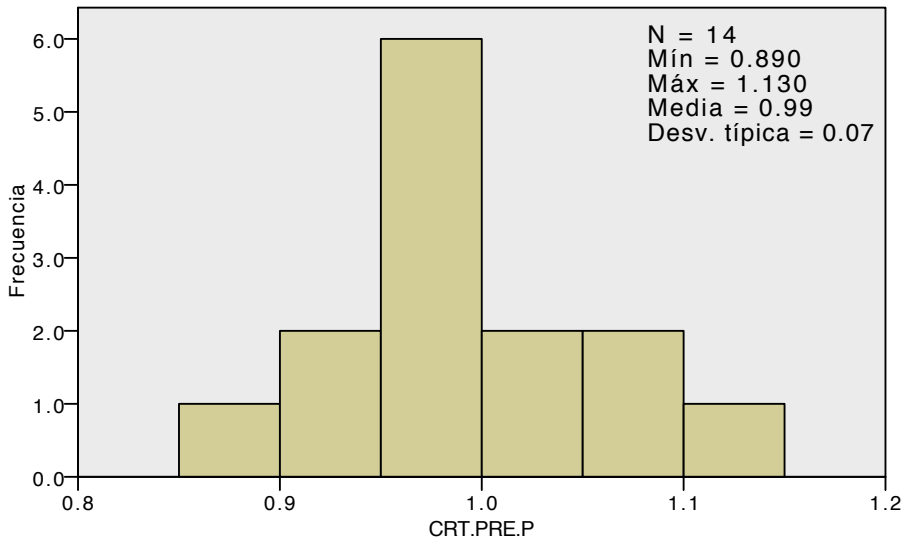

### Información de campo continuo

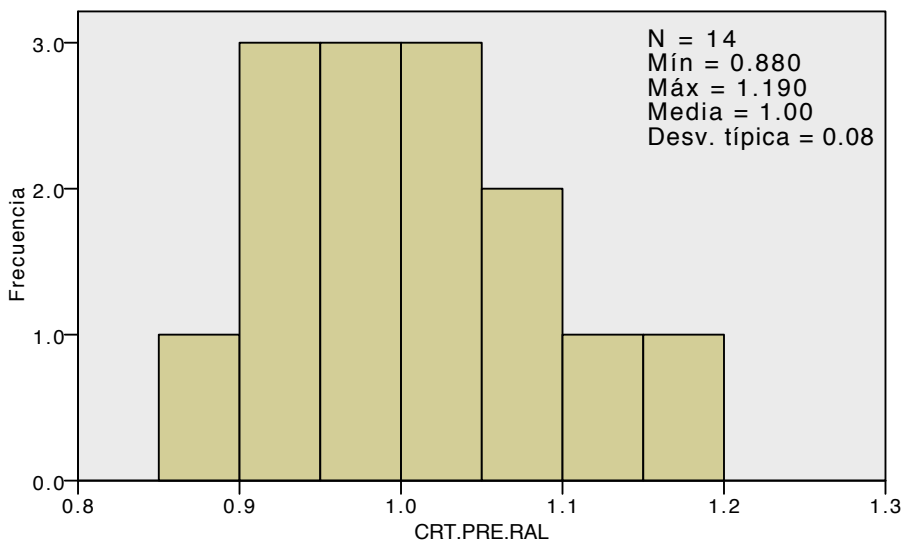

```
*Nonparametric Tests: Related Samples.  
NPTESTS  
/RELATED TEST(AST.PRE.P AST.PRE.RAL) WILCOXON  
/MISSING SCOPE=ANALYSIS USERMISSING=EXCLUDE  
/CRITERIA ALPHA=0.05 CILEVEL=95.
```

### Pruebas no paramétricas

### Notas

|                           |                                             |                                                                                                                                                              |
|---------------------------|---------------------------------------------|--------------------------------------------------------------------------------------------------------------------------------------------------------------|
| <b>Resultados creados</b> |                                             | 23-MAR-2019 18:12:52                                                                                                                                         |
| <b>Comentarios</b>        |                                             |                                                                                                                                                              |
| <b>Entrada</b>            | <b>Datos</b>                                | /Users/SergioBarroso/Desktop/T20-RAL Reviewers/Base de datos/RAL.sav                                                                                         |
|                           | <b>Conjunto de datos activo</b>             | Conjunto_de_datos2                                                                                                                                           |
|                           | <b>Filtro</b>                               | <ninguno>                                                                                                                                                    |
|                           | <b>Peso</b>                                 | <ninguno>                                                                                                                                                    |
|                           | <b>Dividir archivo</b>                      | <ninguno>                                                                                                                                                    |
|                           | <b>Núm. de filas del archivo de trabajo</b> | 14                                                                                                                                                           |
| <b>Sintaxis</b>           |                                             | NPTESTS<br>/RELATED TEST(AST.<br>PRE.P AST.PRE.RAL)<br>WILCOXON<br>/MISSING<br>SCOPE=ANALYSIS<br>USERMISSING=EXCLUDE<br>/CRITERIA ALPHA=0.<br>05 CILEVEL=95. |
| <b>Recursos</b>           | <b>Tiempo de procesador</b>                 | 00:00:00.13                                                                                                                                                  |
|                           | <b>Tiempo transcurrido</b>                  | 00:00:00.00                                                                                                                                                  |

[Conjunto\_de\_datos2] /Users/SergioBarroso/Desktop/T20-RAL Reviewers/Base de datos/RAL.sav

### Resumen de prueba de hipótesis

|   | Hipótesis nula                                                            | Test                                                                | Sig. | Decisión                   |
|---|---------------------------------------------------------------------------|---------------------------------------------------------------------|------|----------------------------|
| 1 | La mediana de las diferencias entre AST.PRE.P y AST.PRE.RAL es igual a 0. | Prueba de Wilcoxon de los rangos con signo de muestras relacionadas | .659 | Retener la hipótesis nula. |

Se muestran las significancias asintóticas. El nivel de significancia es .05.



Prueba de Wilcoxon de los rangos con signo de muestras relacionadas

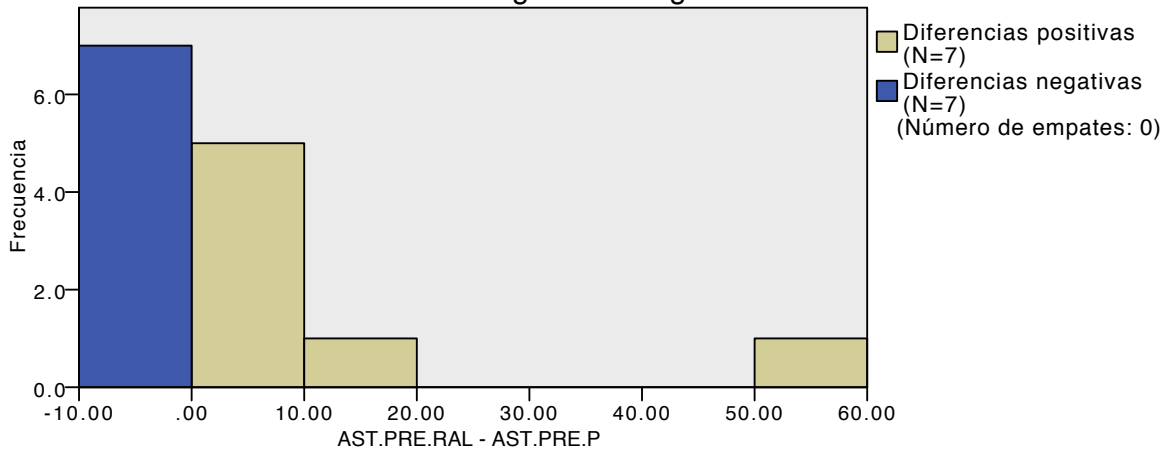

|                                       |        |
|---------------------------------------|--------|
| N total                               | 14     |
| Probar estadística                    | 59.500 |
| Error típico                          | 15.847 |
| Estadística de prueba estandarizada   | .442   |
| Sig. asintótica (prueba de dos caras) | .659   |

### Información de campo continuo

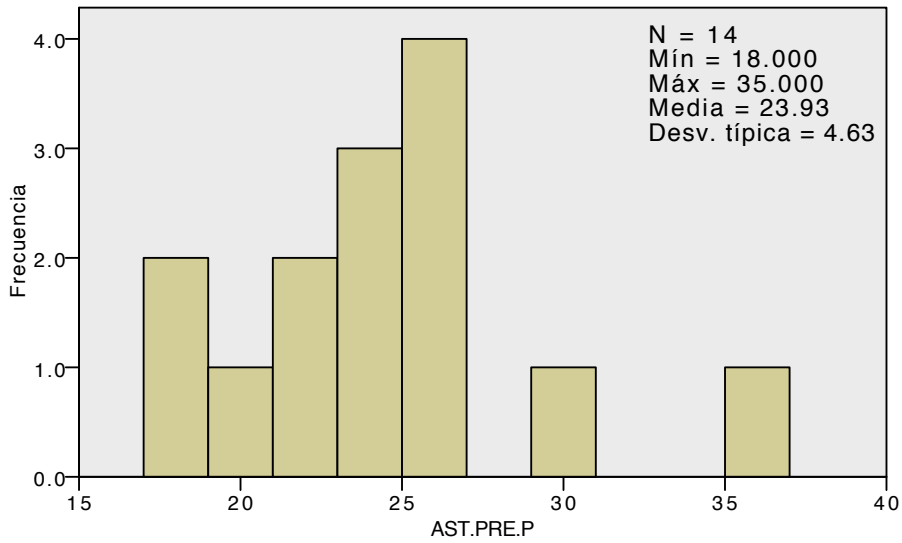

### Información de campo continuo

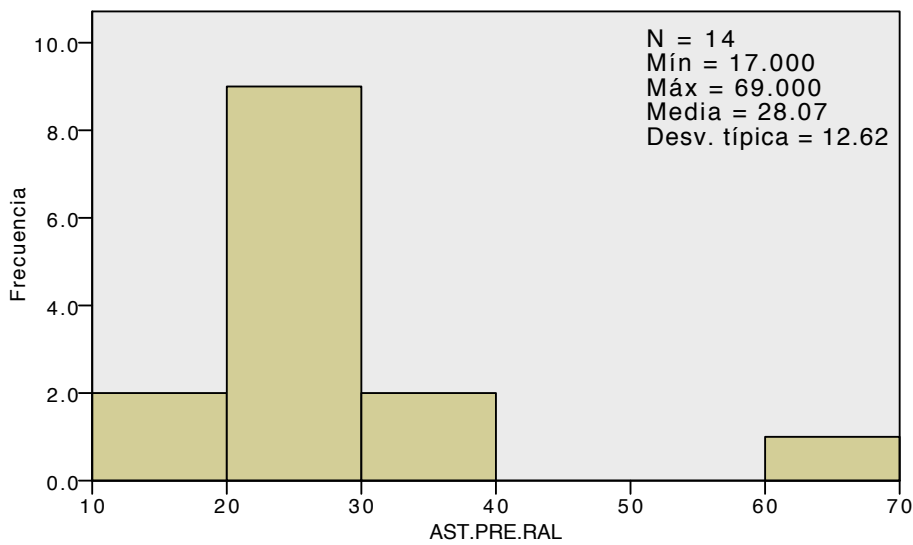

```
*Nonparametric Tests: Related Samples.  
NPTESTS  
/RELATED TEST(ALT.PRE.P ALT.PRE.RAL) WILCOXON  
/MISSING SCOPE=ANALYSIS USERMISSING=EXCLUDE  
/CRITERIA ALPHA=0.05 CILEVEL=95.
```

### Pruebas no paramétricas

### Notas

|                           |                                             |                                                                                                                                                              |
|---------------------------|---------------------------------------------|--------------------------------------------------------------------------------------------------------------------------------------------------------------|
| <b>Resultados creados</b> |                                             | 23-MAR-2019 18:13:16                                                                                                                                         |
| <b>Comentarios</b>        |                                             |                                                                                                                                                              |
| <b>Entrada</b>            | <b>Datos</b>                                | /Users/SergioBarroso/Desktop/T20-RAL Reviewers/Base de datos/RAL.sav                                                                                         |
|                           | <b>Conjunto de datos activo</b>             | Conjunto_de_datos2                                                                                                                                           |
|                           | <b>Filtro</b>                               | <ninguno>                                                                                                                                                    |
|                           | <b>Peso</b>                                 | <ninguno>                                                                                                                                                    |
|                           | <b>Dividir archivo</b>                      | <ninguno>                                                                                                                                                    |
|                           | <b>Núm. de filas del archivo de trabajo</b> | 14                                                                                                                                                           |
| <b>Sintaxis</b>           |                                             | NPTESTS<br>/RELATED TEST(ALT.<br>PRE.P ALT.PRE.RAL)<br>WILCOXON<br>/MISSING<br>SCOPE=ANALYSIS<br>USERMISSING=EXCLUDE<br>/CRITERIA ALPHA=0.<br>05 CILEVEL=95. |
| <b>Recursos</b>           | <b>Tiempo de procesador</b>                 | 00:00:00.09                                                                                                                                                  |
|                           | <b>Tiempo transcurrido</b>                  | 00:00:00.00                                                                                                                                                  |

[Conjunto\_de\_datos2] /Users/SergioBarroso/Desktop/T20-RAL Reviewers/Base de datos/RAL.sav

### Resumen de prueba de hipótesis

|   | Hipótesis nula                                                            | Test                                                                | Sig. | Decisión                   |
|---|---------------------------------------------------------------------------|---------------------------------------------------------------------|------|----------------------------|
| 1 | La mediana de las diferencias entre ALT.PRE.P y ALT.PRE.RAL es igual a 0. | Prueba de Wilcoxon de los rangos con signo de muestras relacionadas | .562 | Retener la hipótesis nula. |

Se muestran las significancias asintóticas. El nivel de significancia es .05.

Prueba de Wilcoxon de los rangos con signo de muestras relacionadas

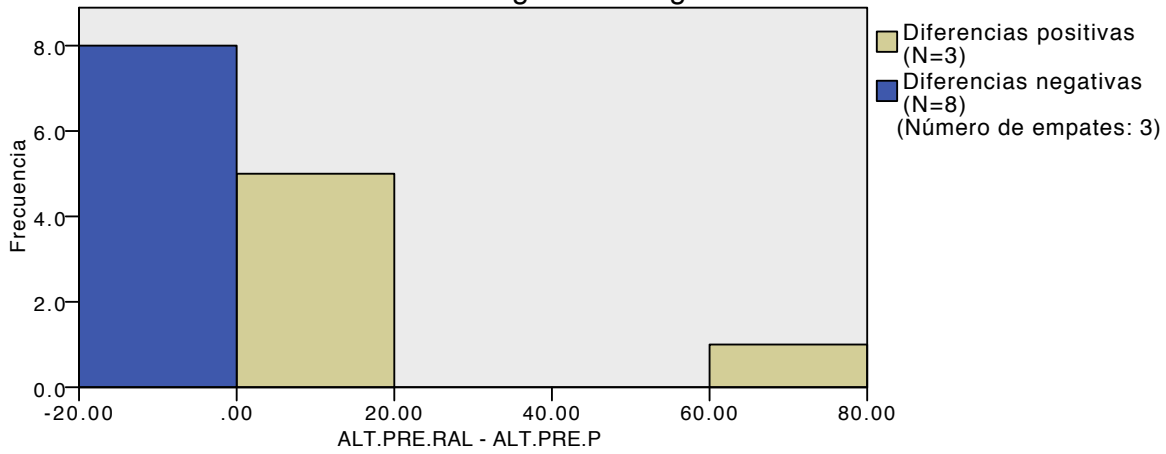

|                                       |        |
|---------------------------------------|--------|
| N total                               | 14     |
| Probar estadística                    | 26.500 |
| Error típico                          | 11.214 |
| Estadística de prueba estandarizada   | -.580  |
| Sig. asintótica (prueba de dos caras) | .562   |

### Información de campo continuo

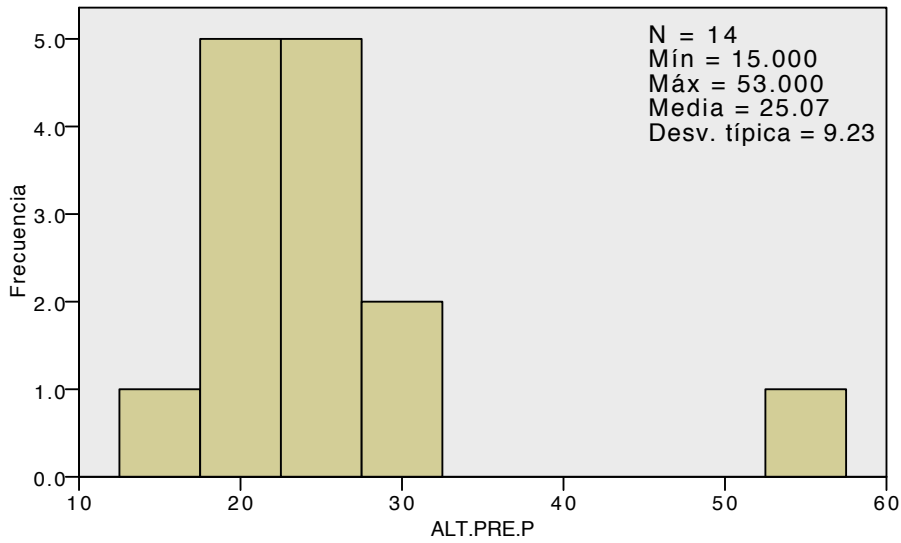

### Información de campo continuo

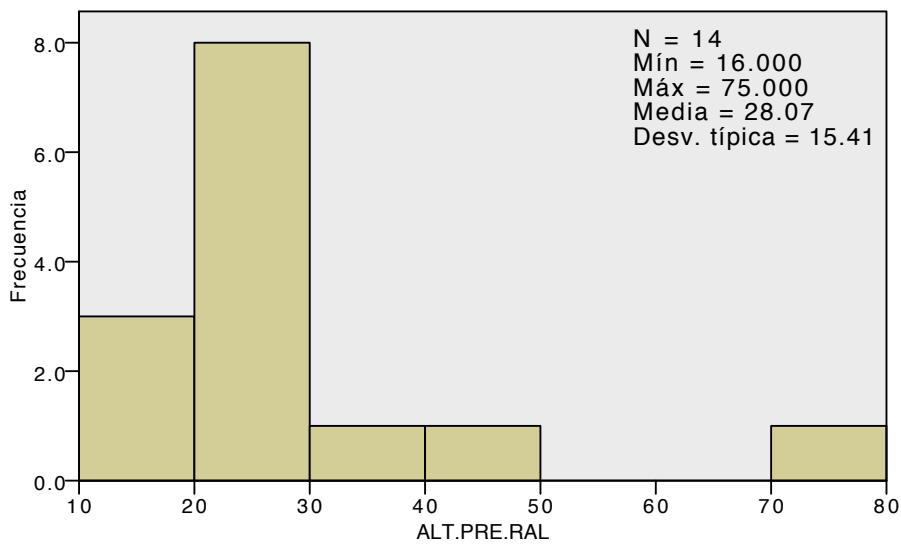

```
*Nonparametric Tests: Related Samples.  
NPTESTS  
/RELATED TEST(BIL.PRE.P BIL.PRE.RAL) WILCOXON  
/MISSING SCOPE=ANALYSIS USERMISSING=EXCLUDE  
/CRITERIA ALPHA=0.05 CILEVEL=95.
```

### Pruebas no paramétricas

Notas

|                           |                                                                                                                                                      |                                                                      |
|---------------------------|------------------------------------------------------------------------------------------------------------------------------------------------------|----------------------------------------------------------------------|
| <b>Resultados creados</b> | 23-MAR-2019 18:13:48                                                                                                                                 |                                                                      |
| <b>Comentarios</b>        |                                                                                                                                                      |                                                                      |
| <b>Entrada</b>            | <b>Datos</b>                                                                                                                                         | /Users/SergioBarroso/Desktop/T20-RAL Reviewers/Base de datos/RAL.sav |
|                           | <b>Conjunto de datos activo</b>                                                                                                                      | Conjunto_de_datos2                                                   |
|                           | <b>Filtro</b>                                                                                                                                        | <ninguno>                                                            |
|                           | <b>Peso</b>                                                                                                                                          | <ninguno>                                                            |
|                           | <b>Dividir archivo</b>                                                                                                                               | <ninguno>                                                            |
|                           | <b>Núm. de filas del archivo de trabajo</b>                                                                                                          | 14                                                                   |
| <b>Sintaxis</b>           | NPTESTS<br>/RELATED TEST(BIL.PRE.P BIL.PRE.RAL)<br>WILCOXON<br>/MISSING<br>SCOPE=ANALYSIS<br>USERMISSING=EXCLUDE<br>/CRITERIA ALPHA=0.05 CILEVEL=95. |                                                                      |
| <b>Recursos</b>           | <b>Tiempo de procesador</b>                                                                                                                          | 00:00:00.06                                                          |
|                           | <b>Tiempo transcurrido</b>                                                                                                                           | 00:00:00.00                                                          |

[Conjunto\_de\_datos2] /Users/SergioBarroso/Desktop/T20-RAL Reviewers/Base de datos/RAL.sav

Resumen de prueba de hipótesis

|   | Hipótesis nula                                                            | Test                                                                | Sig. | Decisión                   |
|---|---------------------------------------------------------------------------|---------------------------------------------------------------------|------|----------------------------|
| 1 | La mediana de las diferencias entre BIL.PRE.P y BIL.PRE.RAL es igual a 0. | Prueba de Wilcoxon de los rangos con signo de muestras relacionadas | .549 | Retener la hipótesis nula. |

Se muestran las significancias asintóticas. El nivel de significancia es .05.

Prueba de Wilcoxon de los rangos con signo de muestras relacionadas

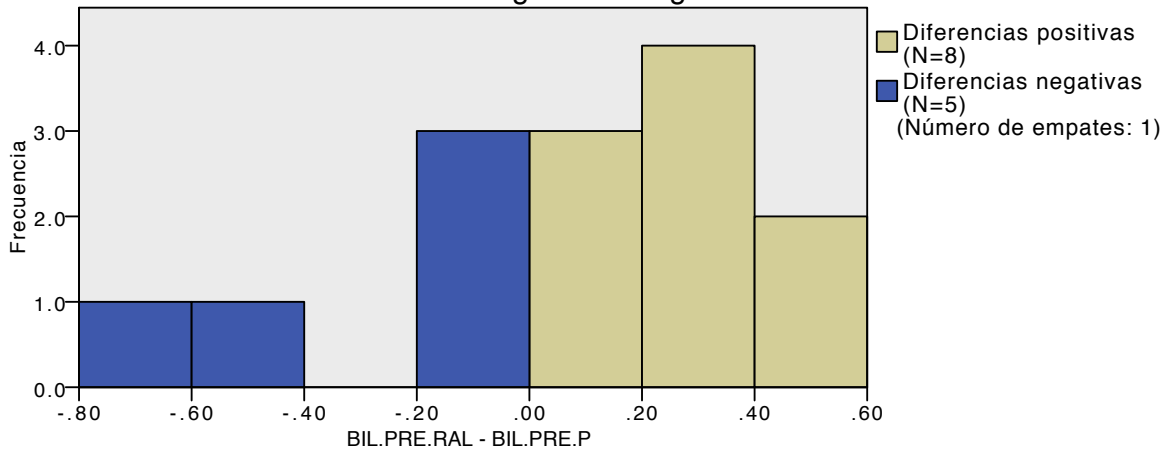

|                                       |        |
|---------------------------------------|--------|
| N total                               | 14     |
| Probar estadística                    | 54.000 |
| Error típico                          | 14.173 |
| Estadística de prueba estandarizada   | .600   |
| Sig. asintótica (prueba de dos caras) | .549   |

### Información de campo continuo

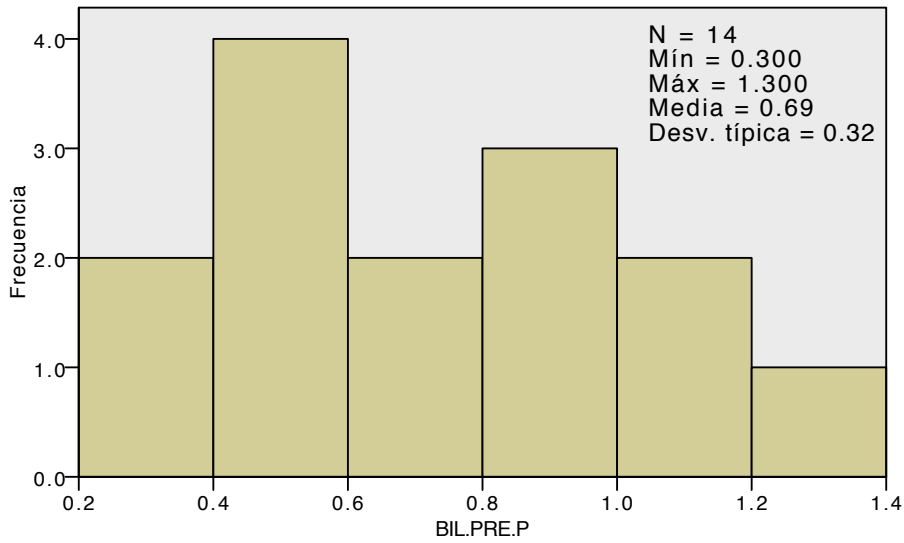

### Información de campo continuo

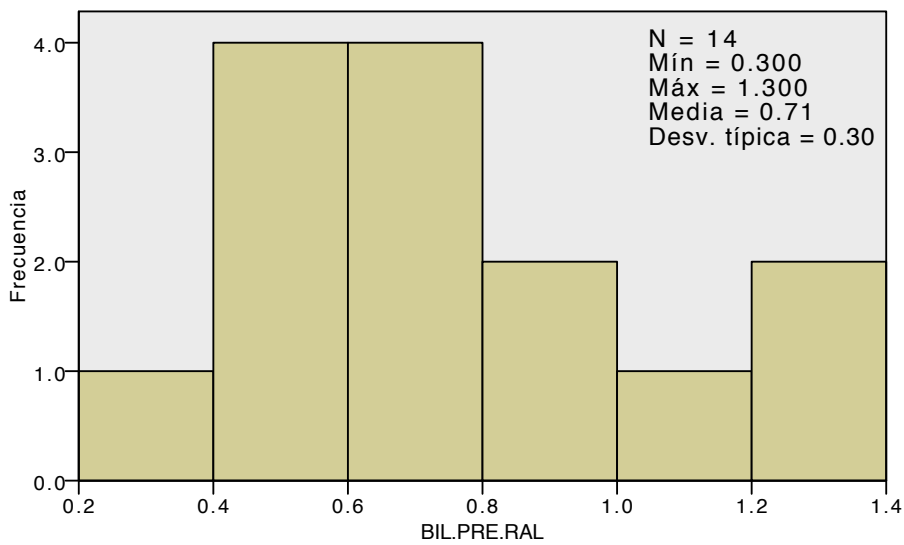

```
*Nonparametric Tests: Related Samples.  
NPTESTS  
/RELATED TEST(PROT.PRE.P PRO.PRE.RAL) WILCOXON  
/MISSING SCOPE=ANALYSIS USERMISSING=EXCLUDE  
/CRITERIA ALPHA=0.05 CILEVEL=95.
```

## Pruebas no paramétricas



Notas

|                           |                                                                                                                                                               |                                                                      |
|---------------------------|---------------------------------------------------------------------------------------------------------------------------------------------------------------|----------------------------------------------------------------------|
| <b>Resultados creados</b> | 23-MAR-2019 18:14:30                                                                                                                                          |                                                                      |
| <b>Comentarios</b>        |                                                                                                                                                               |                                                                      |
| <b>Entrada</b>            | <b>Datos</b>                                                                                                                                                  | /Users/SergioBarroso/Desktop/T20-RAL Reviewers/Base de datos/RAL.sav |
|                           | <b>Conjunto de datos activo</b>                                                                                                                               | Conjunto_de_datos2                                                   |
|                           | <b>Filtro</b>                                                                                                                                                 | <ninguno>                                                            |
|                           | <b>Peso</b>                                                                                                                                                   | <ninguno>                                                            |
|                           | <b>Dividir archivo</b>                                                                                                                                        | <ninguno>                                                            |
|                           | <b>Núm. de filas del archivo de trabajo</b>                                                                                                                   | 14                                                                   |
| <b>Sintaxis</b>           | NPTESTS<br>/RELATED TEST(PROT.<br>PRE.P PRO.PRE.RAL)<br>WILCOXON<br>/MISSING<br>SCOPE=ANALYSIS<br>USERMISSING=EXCLUDE<br>/CRITERIA ALPHA=0.<br>05 CILEVEL=95. |                                                                      |
| <b>Recursos</b>           | <b>Tiempo de procesador</b>                                                                                                                                   | 00:00:00.13                                                          |
|                           | <b>Tiempo transcurrido</b>                                                                                                                                    | 00:00:00.00                                                          |

[Conjunto\_de\_datos2] /Users/SergioBarroso/Desktop/T20-RAL Reviewers/Base de datos/RAL.sav

Resumen de prueba de hipótesis

|   | Hipótesis nula                                                             | Test                                                                | Sig. | Decisión                   |
|---|----------------------------------------------------------------------------|---------------------------------------------------------------------|------|----------------------------|
| 1 | La mediana de las diferencias entre PROT.PRE.P y PRO.PRE.RAL es igual a 0. | Prueba de Wilcoxon de los rangos con signo de muestras relacionadas | .170 | Retener la hipótesis nula. |

Se muestran las significancias asintóticas. El nivel de significancia es .05.

Prueba de Wilcoxon de los rangos con signo de muestras relacionadas

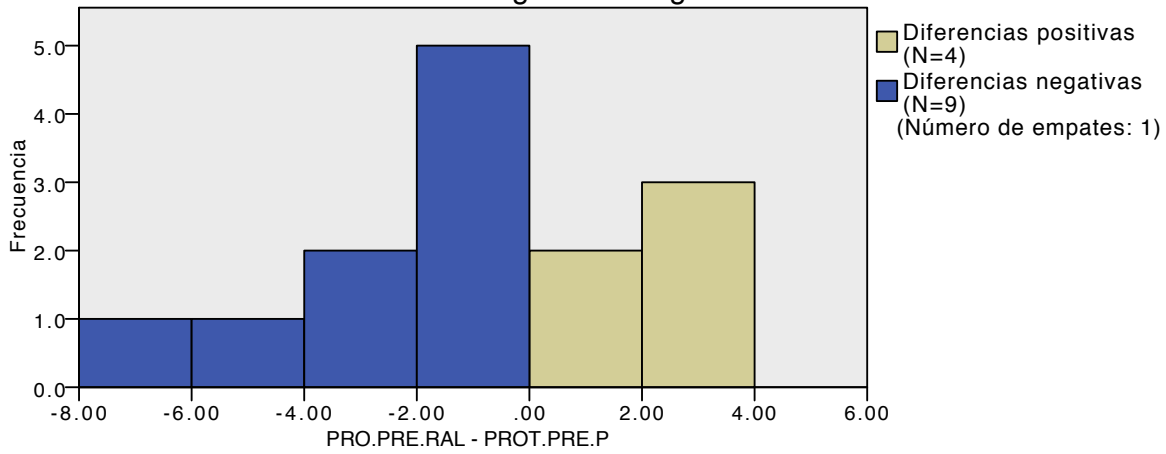

|                                       |        |
|---------------------------------------|--------|
| N total                               | 14     |
| Probar estadística                    | 26.000 |
| Error típico                          | 14.199 |
| Estadística de prueba estandarizada   | -1.373 |
| Sig. asintótica (prueba de dos caras) | .170   |

Información de campo continuo

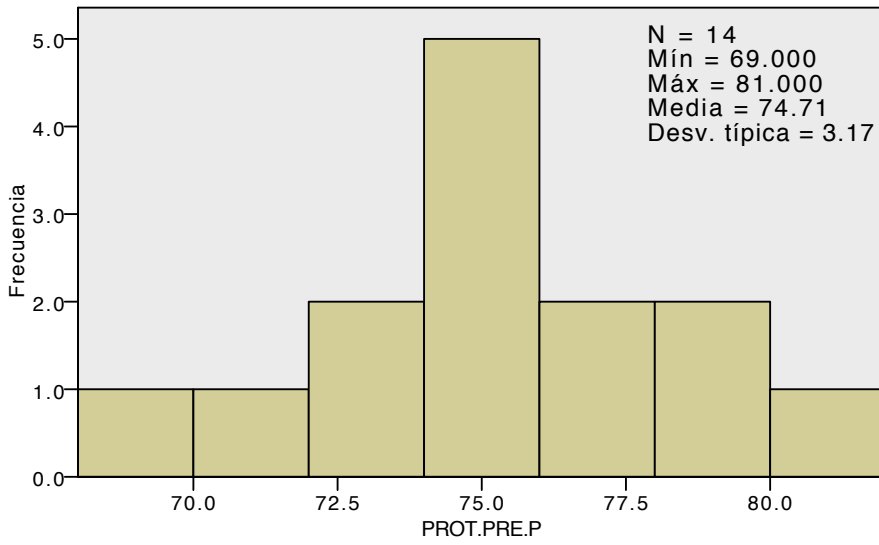

Información de campo continuo

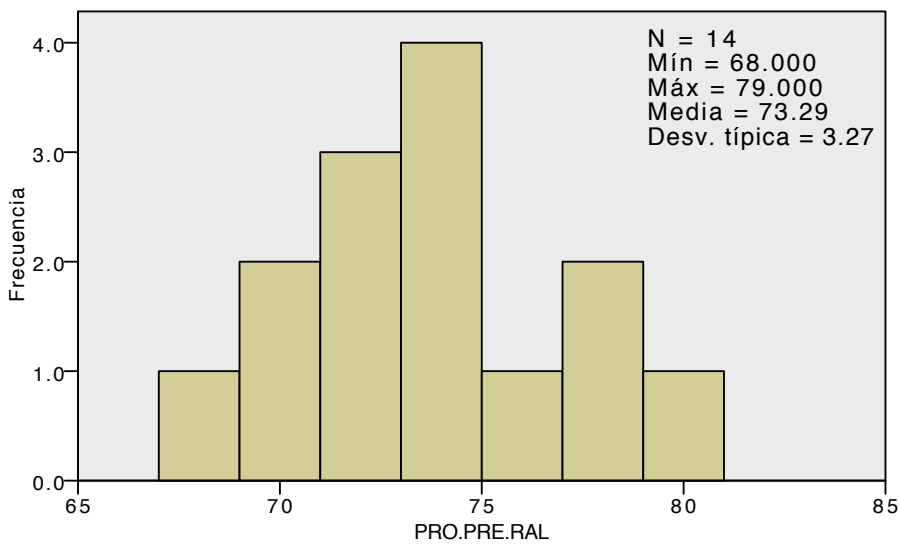

```
*Nonparametric Tests: Related Samples.
NPTESTS
/RELATED TEST(CHOL.DIF.P CHOL.DIF.T20) WILCOXON
/MISSING SCOPE=ANALYSIS USERMISSING=EXCLUDE
/CRITERIA ALPHA=0.05 CILEVEL=95.
```

## Pruebas no paramétricas

### Notas

|                           |                                                                                                                                                   |                                                                      |
|---------------------------|---------------------------------------------------------------------------------------------------------------------------------------------------|----------------------------------------------------------------------|
| <b>Resultados creados</b> | 23-MAR-2019 18:41:17                                                                                                                              |                                                                      |
| <b>Comentarios</b>        |                                                                                                                                                   |                                                                      |
| <b>Entrada</b>            | <b>Datos</b>                                                                                                                                      | /Users/SergioBarroso/Desktop/T20-RAL Reviewers/Base de datos/RAL.sav |
|                           | <b>Conjunto de datos activo</b>                                                                                                                   | Conjunto_de_datos2                                                   |
|                           | <b>Filtro</b>                                                                                                                                     | <ninguno>                                                            |
|                           | <b>Peso</b>                                                                                                                                       | <ninguno>                                                            |
|                           | <b>Dividir archivo</b>                                                                                                                            | <ninguno>                                                            |
|                           | <b>Núm. de filas del archivo de trabajo</b>                                                                                                       | 14                                                                   |
| <b>Sintaxis</b>           | <pre>NPTESTS /RELATED TEST(CHOL. DIF.P CHOL.DIF.T20) WILCOXON /MISSING SCOPE=ANALYSIS USERMISSING=EXCLUDE /CRITERIA ALPHA=0. 05 CILEVEL=95.</pre> |                                                                      |
| <b>Recursos</b>           | <b>Tiempo de procesador</b>                                                                                                                       | 00:00:00.06                                                          |
|                           | <b>Tiempo transcurrido</b>                                                                                                                        | 00:00:00.00                                                          |

[Conjunto\_de\_datos2] /Users/SergioBarroso/Desktop/T20-RAL Reviewers/Base de datos/RAL.sav

### Resumen de prueba de hipótesis

|   | Hipótesis nula                                                                              | Test                                                                | Sig. | Decisión                   |
|---|---------------------------------------------------------------------------------------------|---------------------------------------------------------------------|------|----------------------------|
| 1 | La mediana de las diferencias entre CHOL POST-PRE Placebo y CHOL POST-PRE T20 es igual a 0. | Prueba de Wilcoxon de los rangos con signo de muestras relacionadas | .414 | Retener la hipótesis nula. |

Se muestran las significancias asintóticas. El nivel de significancia es .05.

Prueba de Wilcoxon de los rangos con signo de muestras relacionadas

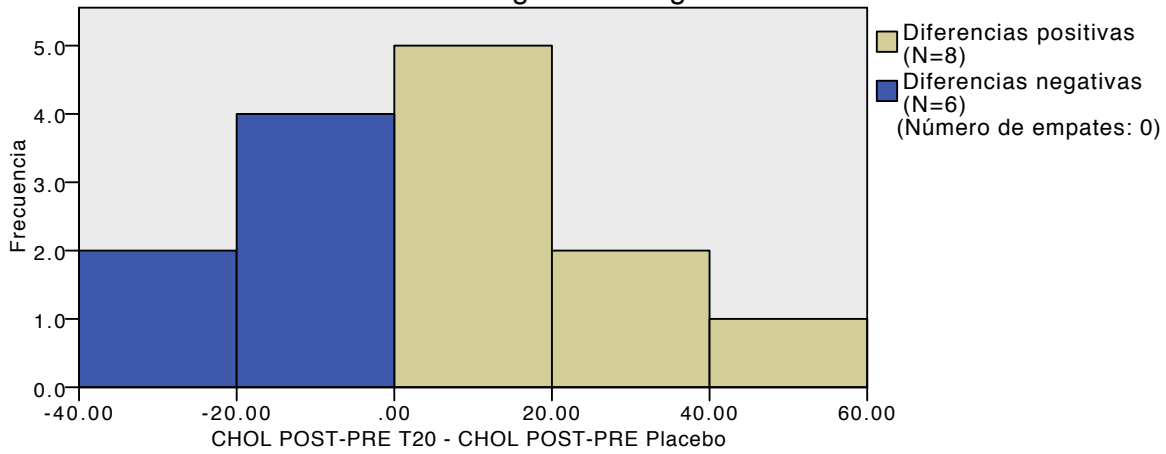

|                                       |        |
|---------------------------------------|--------|
| N total                               | 14     |
| Probar estadística                    | 65.500 |
| Error típico                          | 15.910 |
| Estadística de prueba estandarizada   | .817   |
| Sig. asintótica (prueba de dos caras) | .414   |

### Información de campo continuo

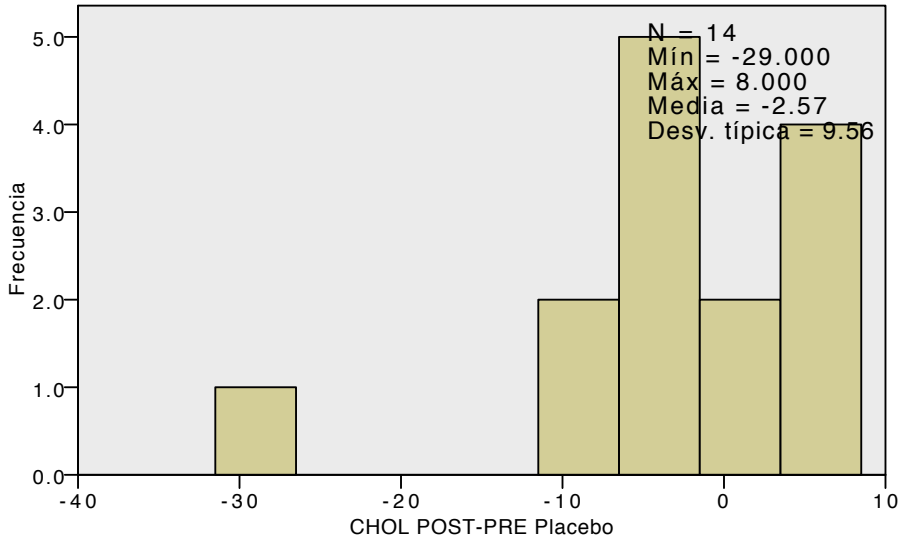

### Información de campo continuo

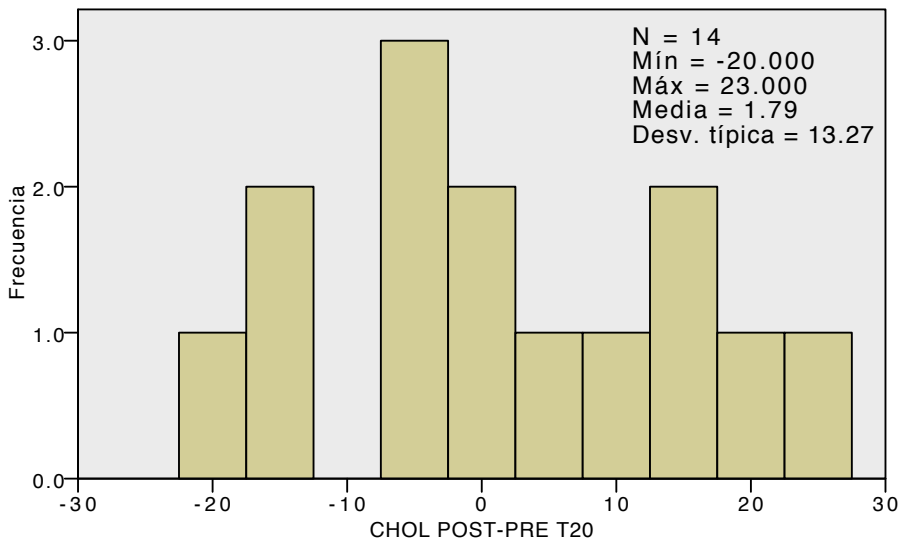

\*Nonparametric Tests: Related Samples.

NPTESTS

/RELATED TEST(HDL.DIF.P HDL.DIF.T20) WILCOXON

/MISSING SCOPE=ANALYSIS USERMISSING=EXCLUDE

/CRITERIA ALPHA=0.05 CILEVEL=95.

## Pruebas no paramétricas

### Notas

|                           |                                                                                                                                                              |                                                                      |
|---------------------------|--------------------------------------------------------------------------------------------------------------------------------------------------------------|----------------------------------------------------------------------|
| <b>Resultados creados</b> | 23-MAR-2019 18:41:35                                                                                                                                         |                                                                      |
| <b>Comentarios</b>        |                                                                                                                                                              |                                                                      |
| <b>Entrada</b>            | <b>Datos</b>                                                                                                                                                 | /Users/SergioBarroso/Desktop/T20-RAL Reviewers/Base de datos/RAL.sav |
|                           | <b>Conjunto de datos activo</b>                                                                                                                              | Conjunto_de_datos2                                                   |
|                           | <b>Filtro</b>                                                                                                                                                | <ninguno>                                                            |
|                           | <b>Peso</b>                                                                                                                                                  | <ninguno>                                                            |
|                           | <b>Dividir archivo</b>                                                                                                                                       | <ninguno>                                                            |
|                           | <b>Núm. de filas del archivo de trabajo</b>                                                                                                                  | 14                                                                   |
| <b>Sintaxis</b>           | NPTESTS<br>/RELATED TEST(HDL.<br>DIF.P HDL.DIF.T20)<br>WILCOXON<br>/MISSING<br>SCOPE=ANALYSIS<br>USERMISSING=EXCLUDE<br>/CRITERIA ALPHA=0.<br>05 CILEVEL=95. |                                                                      |
| <b>Recursos</b>           | <b>Tiempo de procesador</b>                                                                                                                                  | 00:00:00.15                                                          |
|                           | <b>Tiempo transcurrido</b>                                                                                                                                   | 00:00:00.00                                                          |

[Conjunto\_de\_datos2] /Users/SergioBarroso/Desktop/T20-RAL Reviewers/Base de datos/RAL.sav

### Resumen de prueba de hipótesis

|   | Hipótesis nula                                                                            | Test                                                                | Sig. | Decisión                   |
|---|-------------------------------------------------------------------------------------------|---------------------------------------------------------------------|------|----------------------------|
| 1 | La mediana de las diferencias entre HDL POST-PRE Placebo y HDL POST-PRE T20 es igual a 0. | Prueba de Wilcoxon de los rangos con signo de muestras relacionadas | .472 | Retener la hipótesis nula. |

Se muestran las significancias asintóticas. El nivel de significancia es .05.

Prueba de Wilcoxon de los rangos con signo de muestras relacionadas

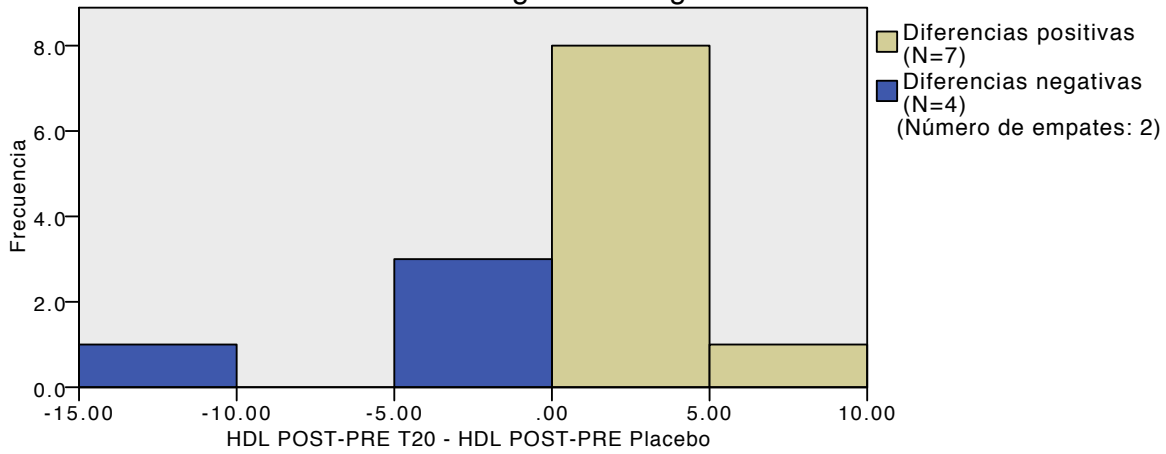

|                                       |        |
|---------------------------------------|--------|
| N total                               | 13     |
| Probar estadística                    | 41.000 |
| Error típico                          | 11.113 |
| Estadística de prueba estandarizada   | .720   |
| Sig. asintótica (prueba de dos caras) | .472   |



### Información de campo continuo

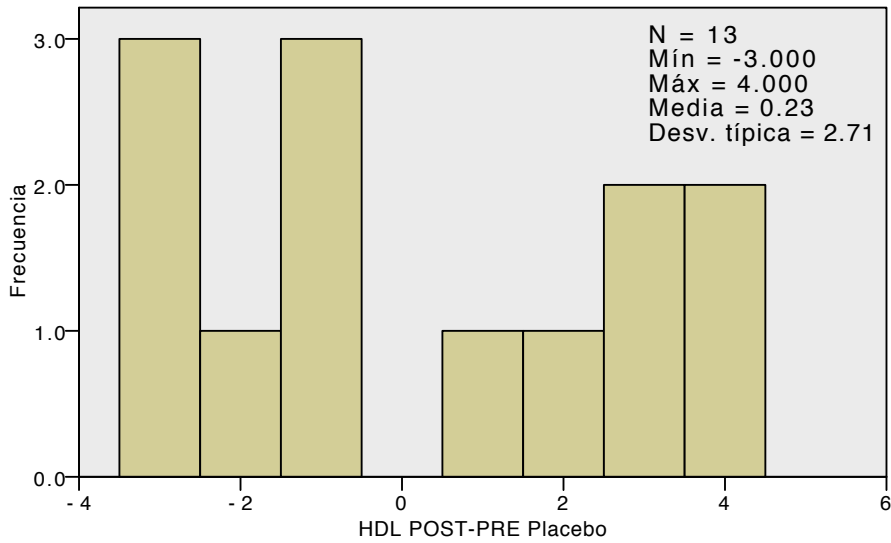

### Información de campo continuo

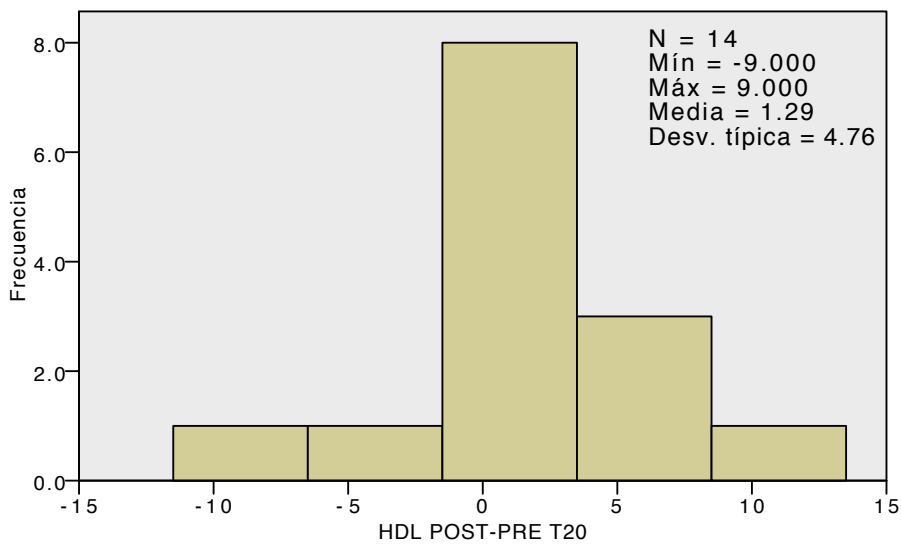

```
*Nonparametric Tests: Related Samples.  
NPTESTS  
/RELATED TEST(LDL.DIF.P LDL.DIF.T20) WILCOXON  
/MISSING SCOPE=ANALYSIS USERMISSING=EXCLUDE  
/CRITERIA ALPHA=0.05 CILEVEL=95.
```

### Pruebas no paramétricas

### Notas

|                           |                                                                                                                                                              |                                                                      |
|---------------------------|--------------------------------------------------------------------------------------------------------------------------------------------------------------|----------------------------------------------------------------------|
| <b>Resultados creados</b> | 23-MAR-2019 18:42:11                                                                                                                                         |                                                                      |
| <b>Comentarios</b>        |                                                                                                                                                              |                                                                      |
| <b>Entrada</b>            | <b>Datos</b>                                                                                                                                                 | /Users/SergioBarroso/Desktop/T20-RAL Reviewers/Base de datos/RAL.sav |
|                           | <b>Conjunto de datos activo</b>                                                                                                                              | Conjunto_de_datos2                                                   |
|                           | <b>Filtro</b>                                                                                                                                                | <ninguno>                                                            |
|                           | <b>Peso</b>                                                                                                                                                  | <ninguno>                                                            |
|                           | <b>Dividir archivo</b>                                                                                                                                       | <ninguno>                                                            |
|                           | <b>Núm. de filas del archivo de trabajo</b>                                                                                                                  | 14                                                                   |
| <b>Sintaxis</b>           | NPTESTS<br>/RELATED TEST(LDL.<br>DIF.P LDL.DIF.T20)<br>WILCOXON<br>/MISSING<br>SCOPE=ANALYSIS<br>USERMISSING=EXCLUDE<br>/CRITERIA ALPHA=0.<br>05 CILEVEL=95. |                                                                      |
| <b>Recursos</b>           | <b>Tiempo de procesador</b>                                                                                                                                  | 00:00:00.19                                                          |
|                           | <b>Tiempo transcurrido</b>                                                                                                                                   | 00:00:00.00                                                          |

[Conjunto\_de\_datos2] /Users/SergioBarroso/Desktop/T20-RAL Reviewers/Base de datos/RAL.sav

### Resumen de prueba de hipótesis

|   | Hipótesis nula                                                                            | Test                                                                | Sig. | Decisión                   |
|---|-------------------------------------------------------------------------------------------|---------------------------------------------------------------------|------|----------------------------|
| 1 | La mediana de las diferencias entre LDL POST-PRE Placebo y LDL POST-PRE T20 es igual a 0. | Prueba de Wilcoxon de los rangos con signo de muestras relacionadas | .223 | Retener la hipótesis nula. |

Se muestran las significancias asintóticas. El nivel de significancia es .05.

Prueba de Wilcoxon de los rangos con signo de muestras relacionadas

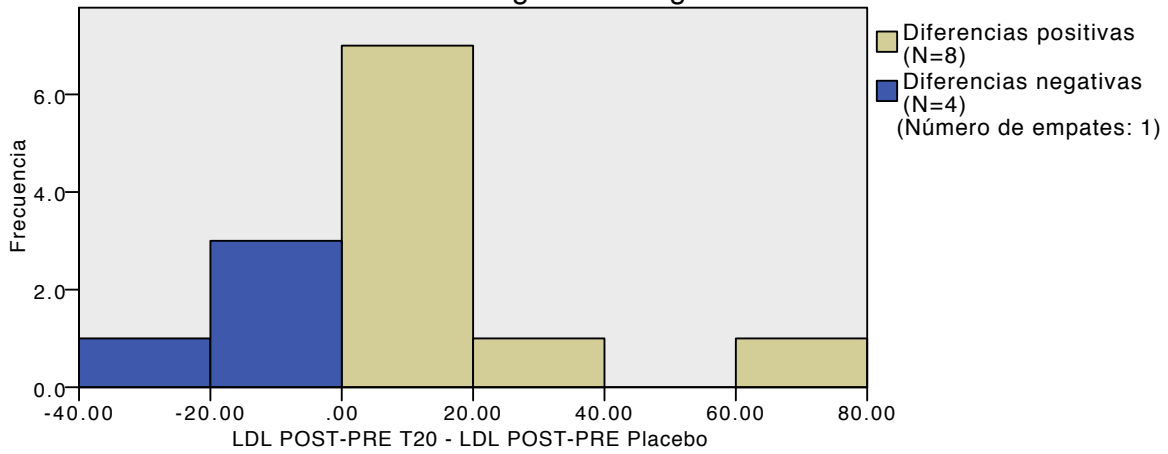

|                                       |        |
|---------------------------------------|--------|
| N total                               | 13     |
| Probar estadística                    | 54.500 |
| Error típico                          | 12.733 |
| Estadística de prueba estandarizada   | 1.217  |
| Sig. asintótica (prueba de dos caras) | .223   |

### Información de campo continuo

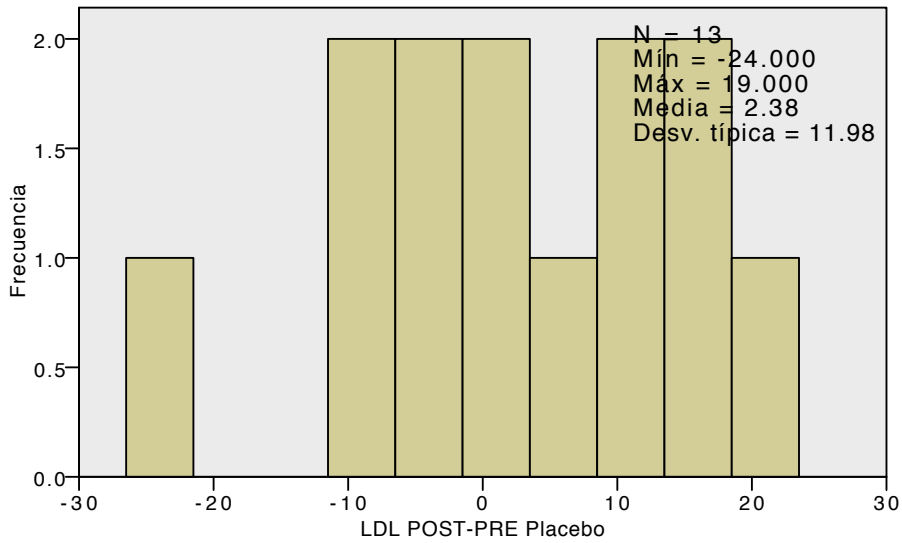

### Información de campo continuo

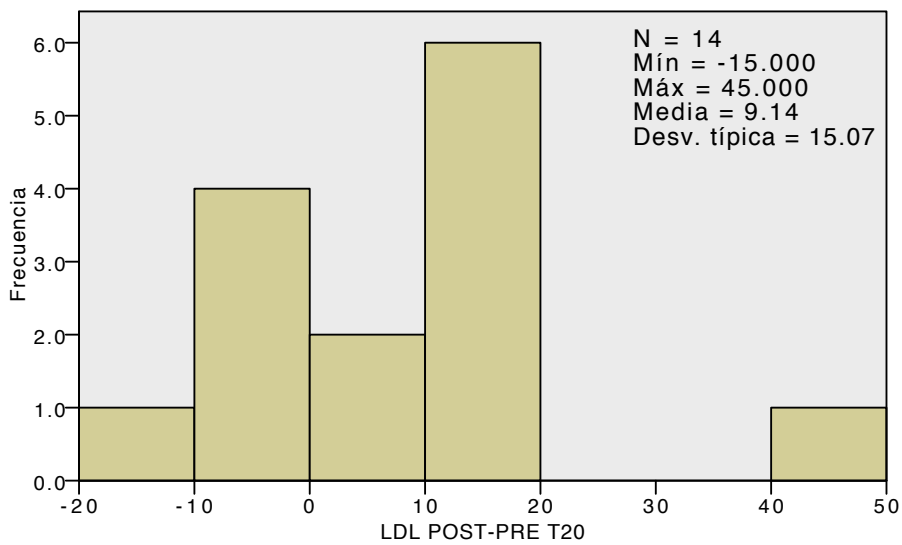

\*Nonparametric Tests: Related Samples.  
NPTESTS  
/RELATED TEST(TAG.DIF.P TAG.DIF.T20) WILCOXON  
/MISSING SCOPE=ANALYSIS USERMISSING=EXCLUDE  
/CRITERIA ALPHA=0.05 CILEVEL=95.

### Pruebas no paramétricas

### Notas

|                           |                                                                                                                                                              |                                                                      |
|---------------------------|--------------------------------------------------------------------------------------------------------------------------------------------------------------|----------------------------------------------------------------------|
| <b>Resultados creados</b> | 23-MAR-2019 18:42:28                                                                                                                                         |                                                                      |
| <b>Comentarios</b>        |                                                                                                                                                              |                                                                      |
| <b>Entrada</b>            | <b>Datos</b>                                                                                                                                                 | /Users/SergioBarroso/Desktop/T20-RAL Reviewers/Base de datos/RAL.sav |
|                           | <b>Conjunto de datos activo</b>                                                                                                                              | Conjunto_de_datos2                                                   |
|                           | <b>Filtro</b>                                                                                                                                                | <ninguno>                                                            |
|                           | <b>Peso</b>                                                                                                                                                  | <ninguno>                                                            |
|                           | <b>Dividir archivo</b>                                                                                                                                       | <ninguno>                                                            |
|                           | <b>Núm. de filas del archivo de trabajo</b>                                                                                                                  | 14                                                                   |
| <b>Sintaxis</b>           | NPTESTS<br>/RELATED TEST(TAG.<br>DIF.P TAG.DIF.T20)<br>WILCOXON<br>/MISSING<br>SCOPE=ANALYSIS<br>USERMISSING=EXCLUDE<br>/CRITERIA ALPHA=0.<br>05 CILEVEL=95. |                                                                      |
| <b>Recursos</b>           | <b>Tiempo de procesador</b>                                                                                                                                  | 00:00:00.07                                                          |
|                           | <b>Tiempo transcurrido</b>                                                                                                                                   | 00:00:00.00                                                          |

[Conjunto\_de\_datos2] /Users/SergioBarroso/Desktop/T20-RAL Reviewers/Base de datos/RAL.sav

### Resumen de prueba de hipótesis

|   | Hipótesis nula                                                                            | Test                                                                | Sig. | Decisión                   |
|---|-------------------------------------------------------------------------------------------|---------------------------------------------------------------------|------|----------------------------|
| 1 | La mediana de las diferencias entre TAG POST-PRE Placebo y TAG POST-PRE T20 es igual a 0. | Prueba de Wilcoxon de los rangos con signo de muestras relacionadas | .397 | Retener la hipótesis nula. |

Se muestran las significancias asintóticas. El nivel de significancia es .05.

Prueba de Wilcoxon de los rangos con signo de muestras relacionadas

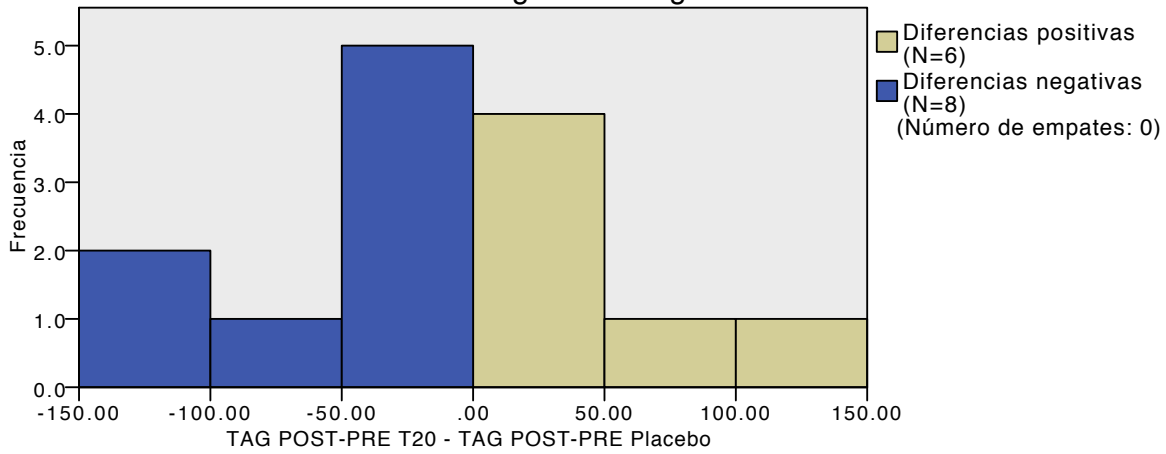

|                                       |        |
|---------------------------------------|--------|
| N total                               | 14     |
| Probar estadística                    | 39.000 |
| Error típico                          | 15.930 |
| Estadística de prueba estandarizada   | -.847  |
| Sig. asintótica (prueba de dos caras) | .397   |

### Información de campo continuo

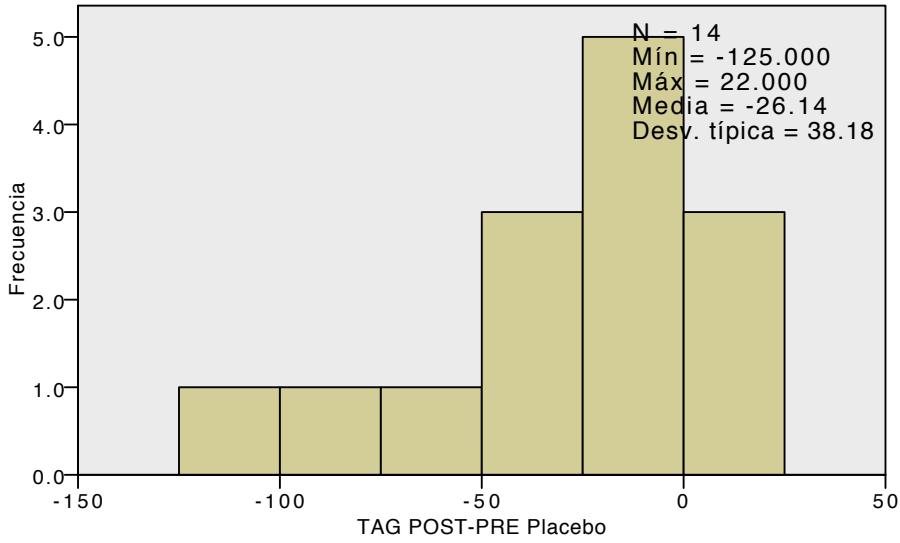

### Información de campo continuo

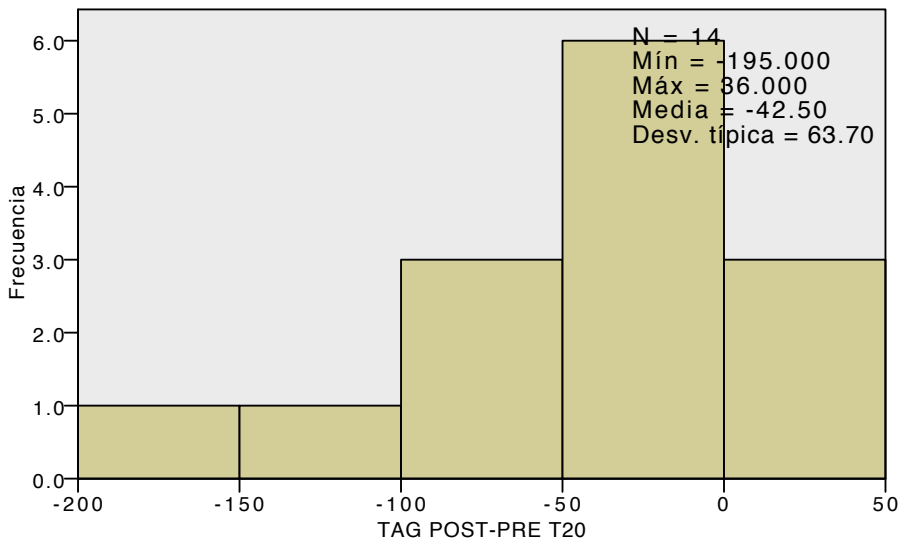

\*Nonparametric Tests: Related Samples.

NPTESTS

/RELATED TEST(GLU.DIF.P GLU.DIF.T20) WILCOXON

/MISSING SCOPE=ANALYSIS USERMISSING=EXCLUDE

/CRITERIA ALPHA=0.05 CILEVEL=95.

## Pruebas no paramétricas

### Notas

|                           |                                                                                                                                                              |                                                                      |
|---------------------------|--------------------------------------------------------------------------------------------------------------------------------------------------------------|----------------------------------------------------------------------|
| <b>Resultados creados</b> | 23-MAR-2019 18:42:44                                                                                                                                         |                                                                      |
| <b>Comentarios</b>        |                                                                                                                                                              |                                                                      |
| <b>Entrada</b>            | <b>Datos</b>                                                                                                                                                 | /Users/SergioBarroso/Desktop/T20-RAL Reviewers/Base de datos/RAL.sav |
|                           | <b>Conjunto de datos activo</b>                                                                                                                              | Conjunto_de_datos2                                                   |
|                           | <b>Filtro</b>                                                                                                                                                | <ninguno>                                                            |
|                           | <b>Peso</b>                                                                                                                                                  | <ninguno>                                                            |
|                           | <b>Dividir archivo</b>                                                                                                                                       | <ninguno>                                                            |
|                           | <b>Núm. de filas del archivo de trabajo</b>                                                                                                                  | 14                                                                   |
| <b>Sintaxis</b>           | NPTESTS<br>/RELATED TEST(GLU.<br>DIF.P GLU.DIF.T20)<br>WILCOXON<br>/MISSING<br>SCOPE=ANALYSIS<br>USERMISSING=EXCLUDE<br>/CRITERIA ALPHA=0.<br>05 CILEVEL=95. |                                                                      |
| <b>Recursos</b>           | <b>Tiempo de procesador</b>                                                                                                                                  | 00:00:00.05                                                          |
|                           | <b>Tiempo transcurrido</b>                                                                                                                                   | 00:00:00.00                                                          |

[Conjunto\_de\_datos2] /Users/SergioBarroso/Desktop/T20-RAL Reviewers/Base de datos/RAL.sav

### Resumen de prueba de hipótesis

|   | Hipótesis nula                                                                            | Test                                                                | Sig. | Decisión                   |
|---|-------------------------------------------------------------------------------------------|---------------------------------------------------------------------|------|----------------------------|
| 1 | La mediana de las diferencias entre GLU POST-PRE Placebo y GLU POST-PRE T20 es igual a 0. | Prueba de Wilcoxon de los rangos con signo de muestras relacionadas | .157 | Retener la hipótesis nula. |

Se muestran las significancias asintóticas. El nivel de significancia es .05.



Prueba de Wilcoxon de los rangos con signo de muestras relacionadas

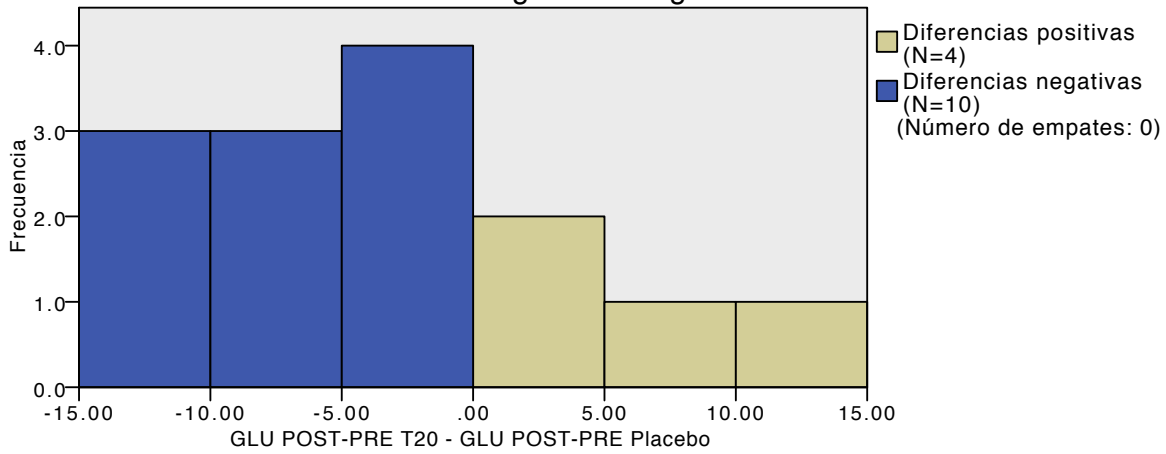

|                                       |        |
|---------------------------------------|--------|
| N total                               | 14     |
| Probar estadística                    | 30.000 |
| Error típico                          | 15.890 |
| Estadística de prueba estandarizada   | -1.416 |
| Sig. asintótica (prueba de dos caras) | .157   |

### Información de campo continuo

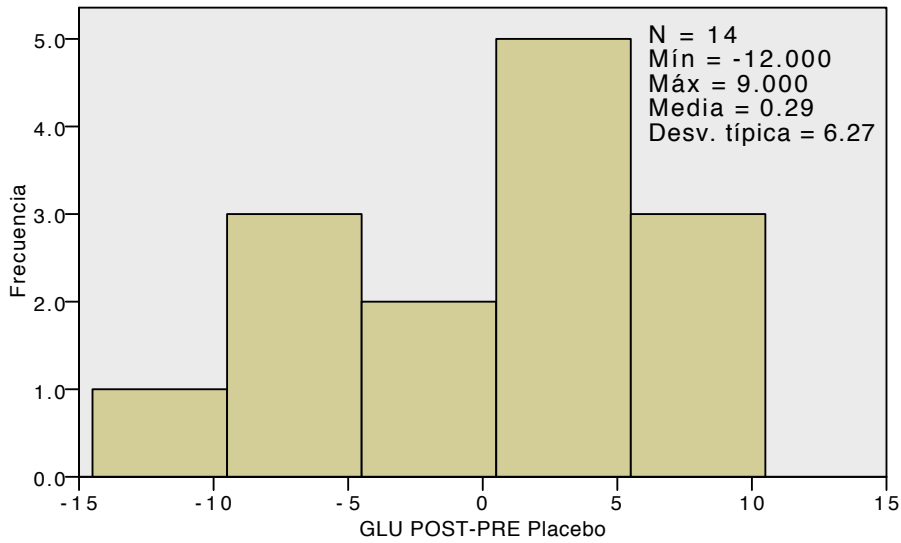

### Información de campo continuo

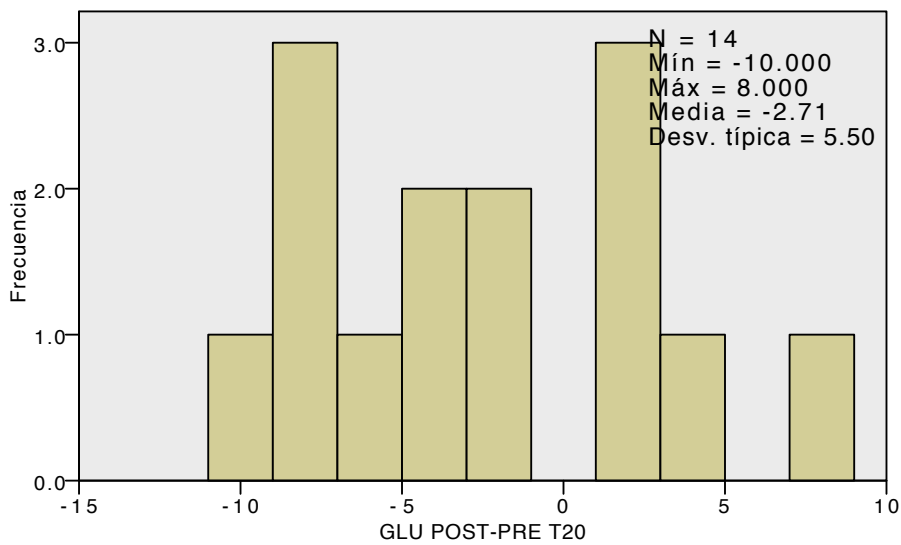

```
*Nonparametric Tests: Related Samples.
NPTESTS
/RELATED TEST(mtDNA.DIF.P mtDNA.DIF.T20) WILCOXON
/MISSING SCOPE=ANALYSIS USERMISSING=EXCLUDE
/CRITERIA ALPHA=0.05 CILEVEL=95.
```

### Pruebas no paramétricas

### Notas

|                           |                                             |                                                                                                                                                                   |
|---------------------------|---------------------------------------------|-------------------------------------------------------------------------------------------------------------------------------------------------------------------|
| <b>Resultados creados</b> |                                             | 23-MAR-2019 18:43:02                                                                                                                                              |
| <b>Comentarios</b>        |                                             |                                                                                                                                                                   |
| <b>Entrada</b>            | <b>Datos</b>                                | /Users/SergioBarroso/Desktop/T20-RAL Reviewers/Base de datos/RAL.sav                                                                                              |
|                           | <b>Conjunto de datos activo</b>             | Conjunto_de_datos2                                                                                                                                                |
|                           | <b>Filtro</b>                               | <ninguno>                                                                                                                                                         |
|                           | <b>Peso</b>                                 | <ninguno>                                                                                                                                                         |
|                           | <b>Dividir archivo</b>                      | <ninguno>                                                                                                                                                         |
|                           | <b>Núm. de filas del archivo de trabajo</b> | 14                                                                                                                                                                |
| <b>Sintaxis</b>           |                                             | NPTESTS<br>/RELATED TEST<br>(mtDNA.DIF.P mtDNA.<br>DIF.T20) WILCOXON<br>/MISSING<br>SCOPE=ANALYSIS<br>USERMISSING=EXCLUDE<br>/CRITERIA ALPHA=0.<br>05 CILEVEL=95. |
| <b>Recursos</b>           | <b>Tiempo de procesador</b>                 | 00:00:00.06                                                                                                                                                       |
|                           | <b>Tiempo transcurrido</b>                  | 00:00:00.00                                                                                                                                                       |

[Conjunto\_de\_datos2] /Users/SergioBarroso/Desktop/T20-RAL Reviewers/Base de datos/RAL.sav

### Resumen de prueba de hipótesis

|   | Hipótesis nula                                                                                | Test                                                                | Sig. | Decisión                   |
|---|-----------------------------------------------------------------------------------------------|---------------------------------------------------------------------|------|----------------------------|
| 1 | La mediana de las diferencias entre mtDNA POST-PRE Placebo y mtDNA POST-PRE T20 es igual a 0. | Prueba de Wilcoxon de los rangos con signo de muestras relacionadas | .683 | Retener la hipótesis nula. |

Se muestran las significancias asintóticas. El nivel de significancia es .05.

Prueba de Wilcoxon de los rangos con signo de muestras relacionadas

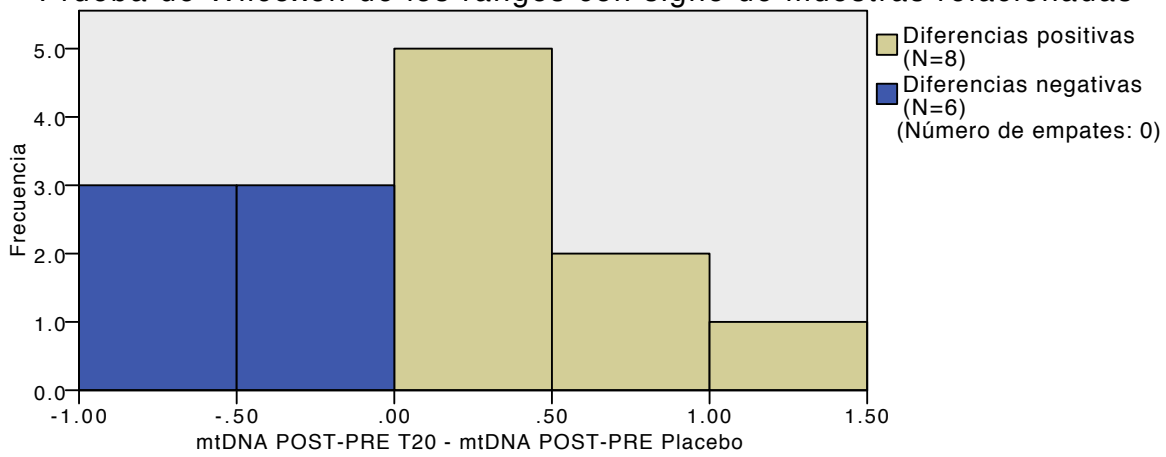

|                                       |        |
|---------------------------------------|--------|
| N total                               | 14     |
| Probar estadística                    | 59.000 |
| Error típico                          | 15.926 |
| Estadística de prueba estandarizada   | .408   |
| Sig. asintótica (prueba de dos caras) | .683   |

### Información de campo continuo

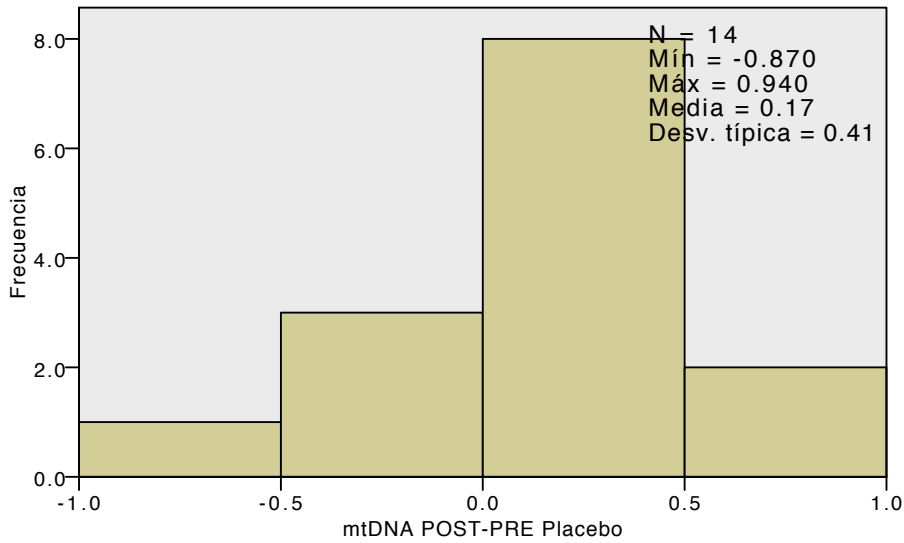

### Información de campo continuo

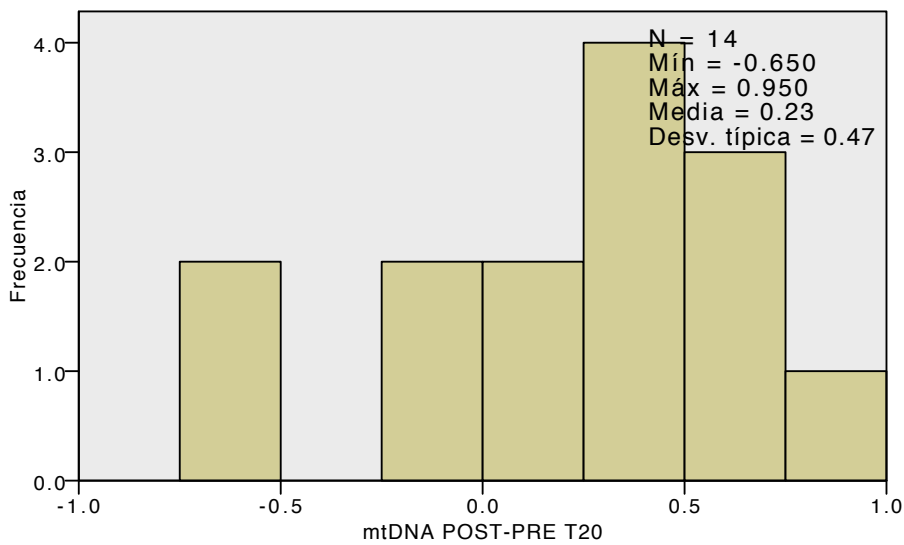

\*Nonparametric Tests: Related Samples.

NPTESTS

/RELATED TEST(CRT.DIF.P CRT.DIF.T20) WILCOXON

/MISSING SCOPE=ANALYSIS USERMISSING=EXCLUDE

/CRITERIA ALPHA=0.05 CILEVEL=95.

## Pruebas no paramétricas

### Notas

|                           |                                             |                                                                                                                                                              |
|---------------------------|---------------------------------------------|--------------------------------------------------------------------------------------------------------------------------------------------------------------|
| <b>Resultados creados</b> |                                             | 23-MAR-2019 18:43:16                                                                                                                                         |
| <b>Comentarios</b>        |                                             |                                                                                                                                                              |
| <b>Entrada</b>            | <b>Datos</b>                                | /Users/SergioBarroso/Desktop/T20-RAL Reviewers/Base de datos/RAL.sav                                                                                         |
|                           | <b>Conjunto de datos activo</b>             | Conjunto_de_datos2                                                                                                                                           |
|                           | <b>Filtro</b>                               | <ninguno>                                                                                                                                                    |
|                           | <b>Peso</b>                                 | <ninguno>                                                                                                                                                    |
|                           | <b>Dividir archivo</b>                      | <ninguno>                                                                                                                                                    |
|                           | <b>Núm. de filas del archivo de trabajo</b> | 14                                                                                                                                                           |
| <b>Sintaxis</b>           |                                             | NPTESTS<br>/RELATED TEST(CRT.<br>DIF.P CRT.DIF.T20)<br>WILCOXON<br>/MISSING<br>SCOPE=ANALYSIS<br>USERMISSING=EXCLUDE<br>/CRITERIA ALPHA=0.<br>05 CILEVEL=95. |
| <b>Recursos</b>           | <b>Tiempo de procesador</b>                 | 00:00:00.07                                                                                                                                                  |
|                           | <b>Tiempo transcurrido</b>                  | 00:00:00.00                                                                                                                                                  |

[Conjunto\_de\_datos2] /Users/SergioBarroso/Desktop/T20-RAL Reviewers/Base de datos/RAL.sav

### Resumen de prueba de hipótesis

|   | Hipótesis nula                                                                            | Test                                                                | Sig. | Decisión                   |
|---|-------------------------------------------------------------------------------------------|---------------------------------------------------------------------|------|----------------------------|
| 1 | La mediana de las diferencias entre CRT POST-PRE Placebo y CRT POST-PRE T20 es igual a 0. | Prueba de Wilcoxon de los rangos con signo de muestras relacionadas | .693 | Retener la hipótesis nula. |

Se muestran las significancias asintóticas. El nivel de significancia es .05.

Prueba de Wilcoxon de los rangos con signo de muestras relacionadas

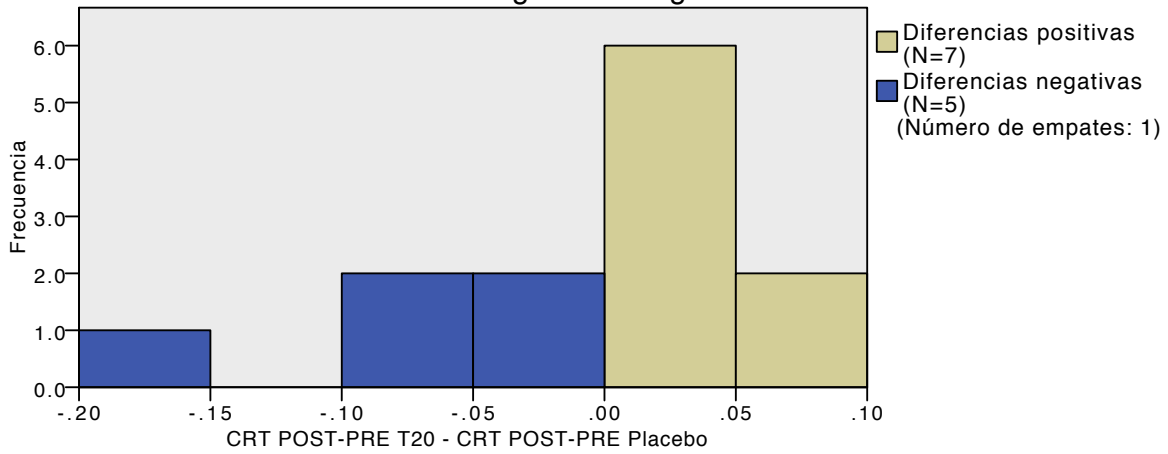

|                                       |        |
|---------------------------------------|--------|
| N total                               | 13     |
| Probar estadística                    | 34.000 |
| Error típico                          | 12.674 |
| Estadística de prueba estandarizada   | -.395  |
| Sig. asintótica (prueba de dos caras) | .693   |

### Información de campo continuo

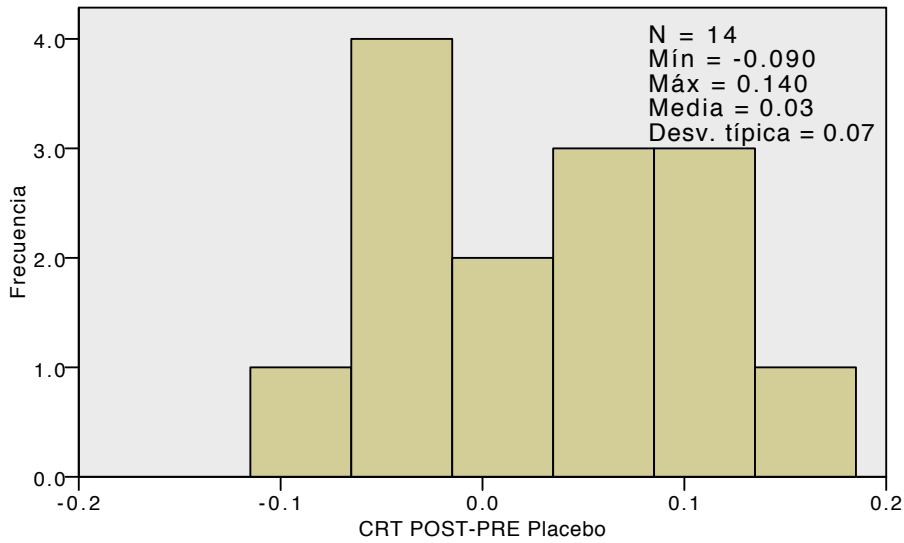

### Información de campo continuo

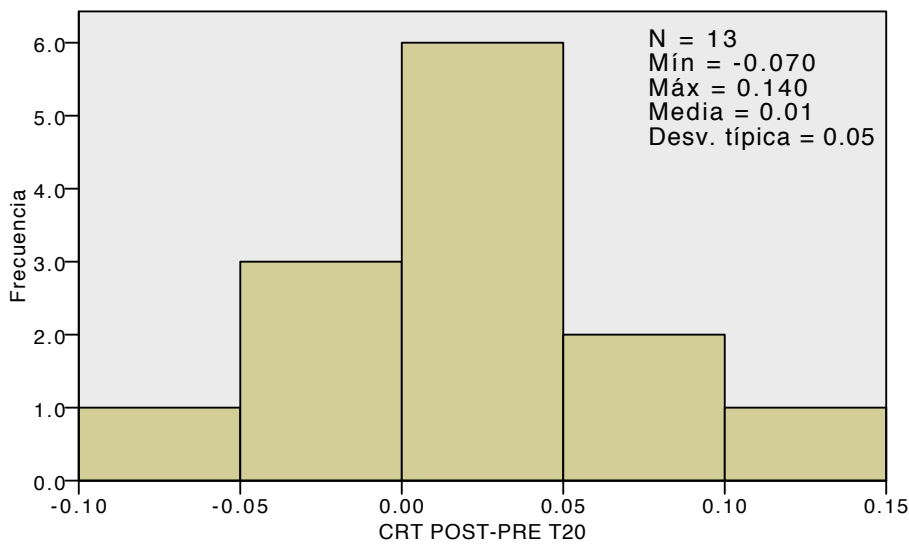

```
*Nonparametric Tests: Related Samples.  
NPTESTS  
  /RELATED TEST(AST.DIF.P AST.DIF.T20) WILCOXON  
  /MISSING SCOPE=ANALYSIS USERMISSING=EXCLUDE  
  /CRITERIA ALPHA=0.05 CILEVEL=95.
```

### Pruebas no paramétricas



### Notas

|                           |                                                                                                                                                              |                                                                      |
|---------------------------|--------------------------------------------------------------------------------------------------------------------------------------------------------------|----------------------------------------------------------------------|
| <b>Resultados creados</b> | 23-MAR-2019 18:43:35                                                                                                                                         |                                                                      |
| <b>Comentarios</b>        |                                                                                                                                                              |                                                                      |
| <b>Entrada</b>            | <b>Datos</b>                                                                                                                                                 | /Users/SergioBarroso/Desktop/T20-RAL Reviewers/Base de datos/RAL.sav |
|                           | <b>Conjunto de datos activo</b>                                                                                                                              | Conjunto_de_datos2                                                   |
|                           | <b>Filtro</b>                                                                                                                                                | <ninguno>                                                            |
|                           | <b>Peso</b>                                                                                                                                                  | <ninguno>                                                            |
|                           | <b>Dividir archivo</b>                                                                                                                                       | <ninguno>                                                            |
|                           | <b>Núm. de filas del archivo de trabajo</b>                                                                                                                  | 14                                                                   |
| <b>Sintaxis</b>           | NPTESTS<br>/RELATED TEST(AST.<br>DIF.P AST.DIF.T20)<br>WILCOXON<br>/MISSING<br>SCOPE=ANALYSIS<br>USERMISSING=EXCLUDE<br>/CRITERIA ALPHA=0.<br>05 CILEVEL=95. |                                                                      |
| <b>Recursos</b>           | <b>Tiempo de procesador</b>                                                                                                                                  | 00:00:00.06                                                          |
|                           | <b>Tiempo transcurrido</b>                                                                                                                                   | 00:00:00.00                                                          |

[Conjunto\_de\_datos2] /Users/SergioBarroso/Desktop/T20-RAL Reviewers/Base de datos/RAL.sav

### Resumen de prueba de hipótesis

|   | Hipótesis nula                                                                            | Test                                                                | Sig. | Decisión                   |
|---|-------------------------------------------------------------------------------------------|---------------------------------------------------------------------|------|----------------------------|
| 1 | La mediana de las diferencias entre AST POST-PRE Placebo y AST POST-PRE T20 es igual a 0. | Prueba de Wilcoxon de los rangos con signo de muestras relacionadas | .593 | Retener la hipótesis nula. |

Se muestran las significancias asintóticas. El nivel de significancia es .05.

Prueba de Wilcoxon de los rangos con signo de muestras relacionadas

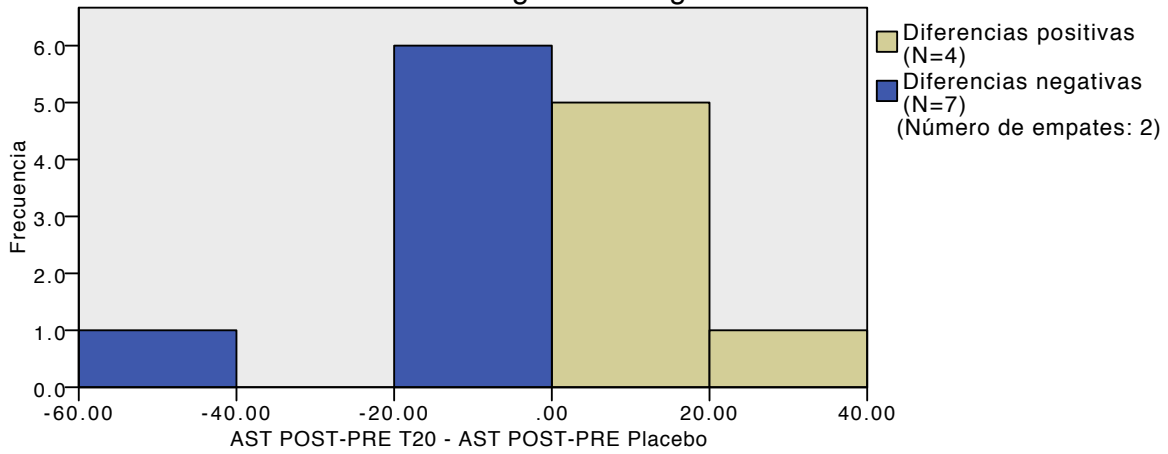

|                                       |        |
|---------------------------------------|--------|
| N total                               | 13     |
| Probar estadística                    | 27.000 |
| Error típico                          | 11.231 |
| Estadística de prueba estandarizada   | -.534  |
| Sig. asintótica (prueba de dos caras) | .593   |

### Información de campo continuo

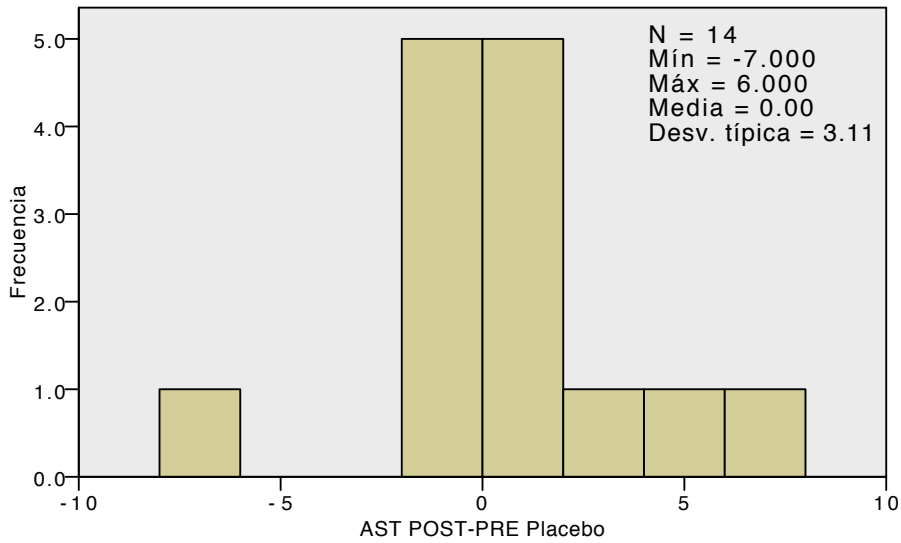

### Información de campo continuo

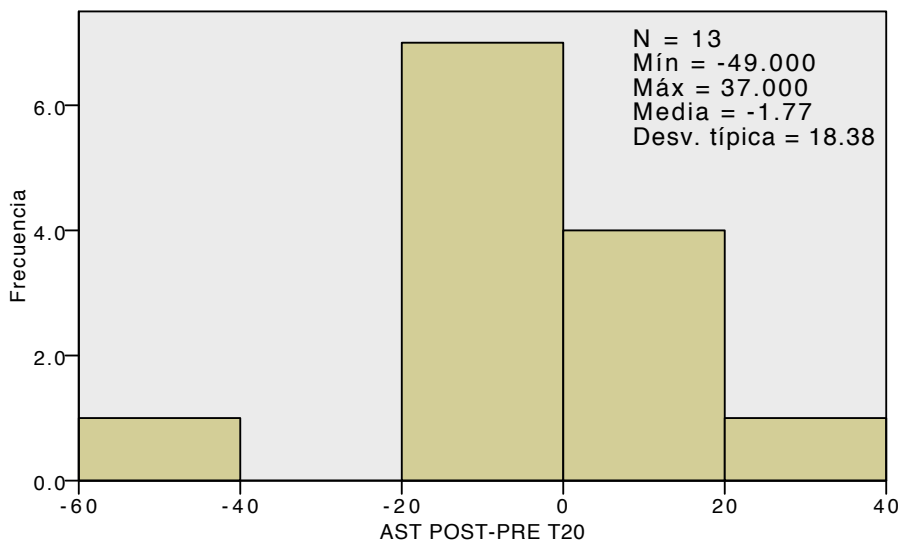

```
*Nonparametric Tests: Related Samples.  
NPTESTS  
/RELATED TEST(ALT.DIF.P ALT.DIF.T20) WILCOXON  
/MISSING SCOPE=ANALYSIS USERMISSING=EXCLUDE  
/CRITERIA ALPHA=0.05 CILEVEL=95.
```

### Pruebas no paramétricas

### Notas

|                           |                                             |                                                                                                                                                              |
|---------------------------|---------------------------------------------|--------------------------------------------------------------------------------------------------------------------------------------------------------------|
| <b>Resultados creados</b> |                                             | 23-MAR-2019 18:43:55                                                                                                                                         |
| <b>Comentarios</b>        |                                             |                                                                                                                                                              |
| <b>Entrada</b>            | <b>Datos</b>                                | /Users/SergioBarroso/Desktop/T20-RAL Reviewers/Base de datos/RAL.sav                                                                                         |
|                           | <b>Conjunto de datos activo</b>             | Conjunto_de_datos2                                                                                                                                           |
|                           | <b>Filtro</b>                               | <ninguno>                                                                                                                                                    |
|                           | <b>Peso</b>                                 | <ninguno>                                                                                                                                                    |
|                           | <b>Dividir archivo</b>                      | <ninguno>                                                                                                                                                    |
|                           | <b>Núm. de filas del archivo de trabajo</b> | 14                                                                                                                                                           |
| <b>Sintaxis</b>           |                                             | NPTESTS<br>/RELATED TEST(ALT.<br>DIF.P ALT.DIF.T20)<br>WILCOXON<br>/MISSING<br>SCOPE=ANALYSIS<br>USERMISSING=EXCLUDE<br>/CRITERIA ALPHA=0.<br>05 CILEVEL=95. |
| <b>Recursos</b>           | <b>Tiempo de procesador</b>                 | 00:00:00.07                                                                                                                                                  |
|                           | <b>Tiempo transcurrido</b>                  | 00:00:00.00                                                                                                                                                  |

[Conjunto\_de\_datos2] /Users/SergioBarroso/Desktop/T20-RAL Reviewers/Base de datos/RAL.sav

### Resumen de prueba de hipótesis

|   | Hipótesis nula                                                                            | Test                                                                | Sig. | Decisión                   |
|---|-------------------------------------------------------------------------------------------|---------------------------------------------------------------------|------|----------------------------|
| 1 | La mediana de las diferencias entre ALT POST-PRE Placebo y ALT POST-PRE T20 es igual a 0. | Prueba de Wilcoxon de los rangos con signo de muestras relacionadas | .345 | Retener la hipótesis nula. |

Se muestran las significancias asintóticas. El nivel de significancia es .05.

Prueba de Wilcoxon de los rangos con signo de muestras relacionadas

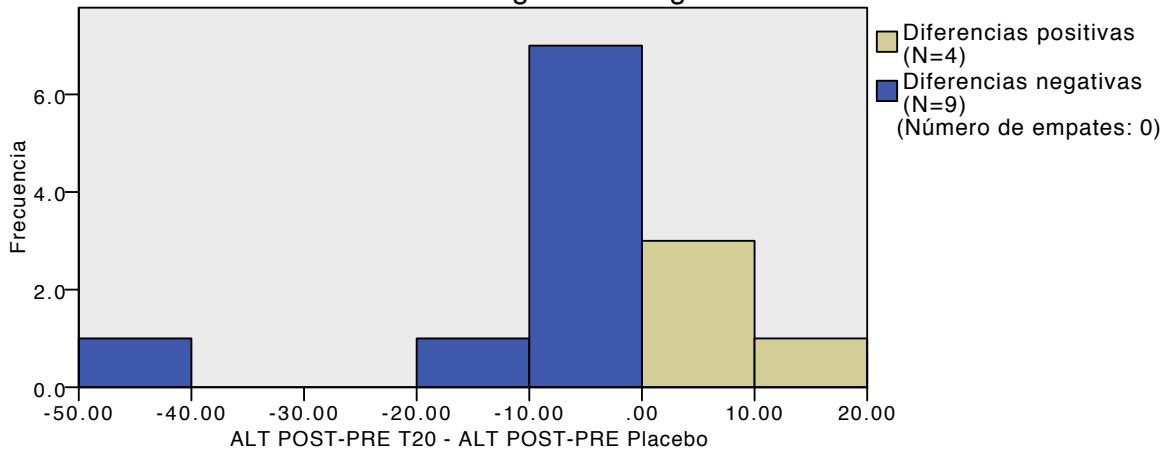

|                                       |        |
|---------------------------------------|--------|
| N total                               | 13     |
| Probar estadística                    | 32.000 |
| Error típico                          | 14.292 |
| Estadística de prueba estandarizada   | -.945  |
| Sig. asintótica (prueba de dos caras) | .345   |

### Información de campo continuo

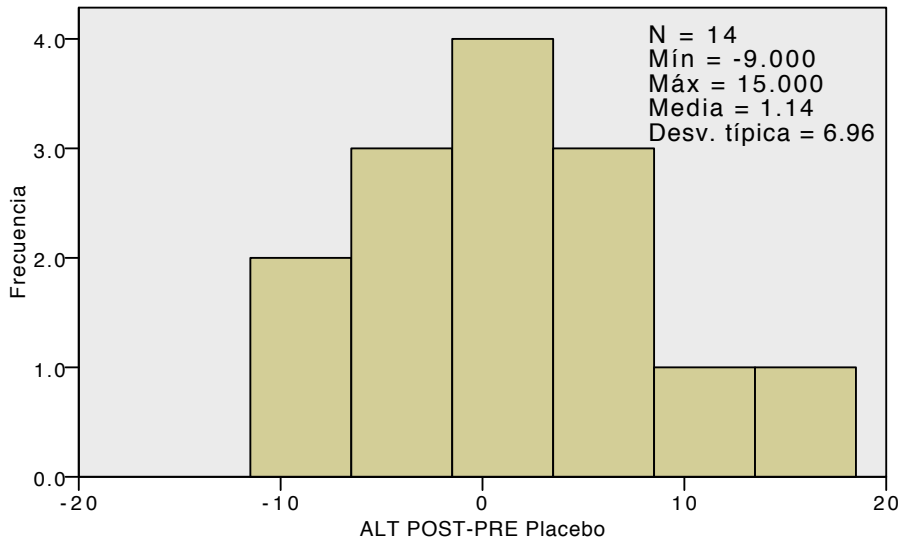

### Información de campo continuo

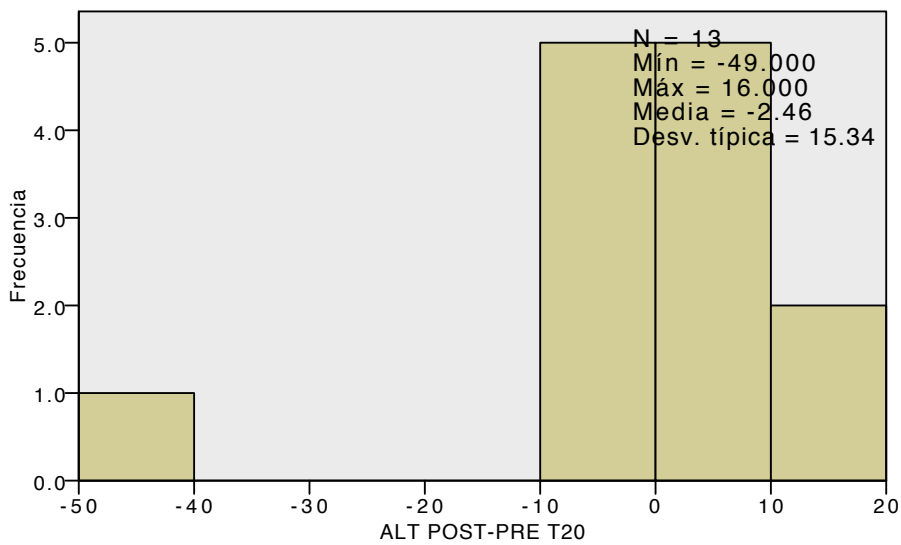

\*Nonparametric Tests: Related Samples.  
NPTESTS  
/RELATED TEST(BIL.DIF.P BIL.DIF.T20) WILCOXON  
/MISSING SCOPE=ANALYSIS USERMISSING=EXCLUDE  
/CRITERIA ALPHA=0.05 CILEVEL=95.

### Pruebas no paramétricas

### Notas

|                           |                                             |                                                                                                                                                              |
|---------------------------|---------------------------------------------|--------------------------------------------------------------------------------------------------------------------------------------------------------------|
| <b>Resultados creados</b> |                                             | 23-MAR-2019 18:44:15                                                                                                                                         |
| <b>Comentarios</b>        |                                             |                                                                                                                                                              |
| <b>Entrada</b>            | <b>Datos</b>                                | /Users/SergioBarroso/Desktop/T20-RAL Reviewers/Base de datos/RAL.sav                                                                                         |
|                           | <b>Conjunto de datos activo</b>             | Conjunto_de_datos2                                                                                                                                           |
|                           | <b>Filtro</b>                               | <ninguno>                                                                                                                                                    |
|                           | <b>Peso</b>                                 | <ninguno>                                                                                                                                                    |
|                           | <b>Dividir archivo</b>                      | <ninguno>                                                                                                                                                    |
|                           | <b>Núm. de filas del archivo de trabajo</b> | 14                                                                                                                                                           |
| <b>Sintaxis</b>           |                                             | NPTESTS<br>/RELATED TEST(BIL.<br>DIF.P BIL.DIF.T20)<br>WILCOXON<br>/MISSING<br>SCOPE=ANALYSIS<br>USERMISSING=EXCLUDE<br>/CRITERIA ALPHA=0.<br>05 CILEVEL=95. |
| <b>Recursos</b>           | <b>Tiempo de procesador</b>                 | 00:00:00.07                                                                                                                                                  |
|                           | <b>Tiempo transcurrido</b>                  | 00:00:00.00                                                                                                                                                  |

[Conjunto\_de\_datos2] /Users/SergioBarroso/Desktop/T20-RAL Reviewers/Base de datos/RAL.sav

### Resumen de prueba de hipótesis

|   | Hipótesis nula                                                                            | Test                                                                | Sig. | Decisión                   |
|---|-------------------------------------------------------------------------------------------|---------------------------------------------------------------------|------|----------------------------|
| 1 | La mediana de las diferencias entre BIL POST-PRE Placebo y BIL POST-PRE T20 es igual a 0. | Prueba de Wilcoxon de los rangos con signo de muestras relacionadas | .929 | Retener la hipótesis nula. |

Se muestran las significancias asintóticas. El nivel de significancia es .05.

Prueba de Wilcoxon de los rangos con signo de muestras relacionadas

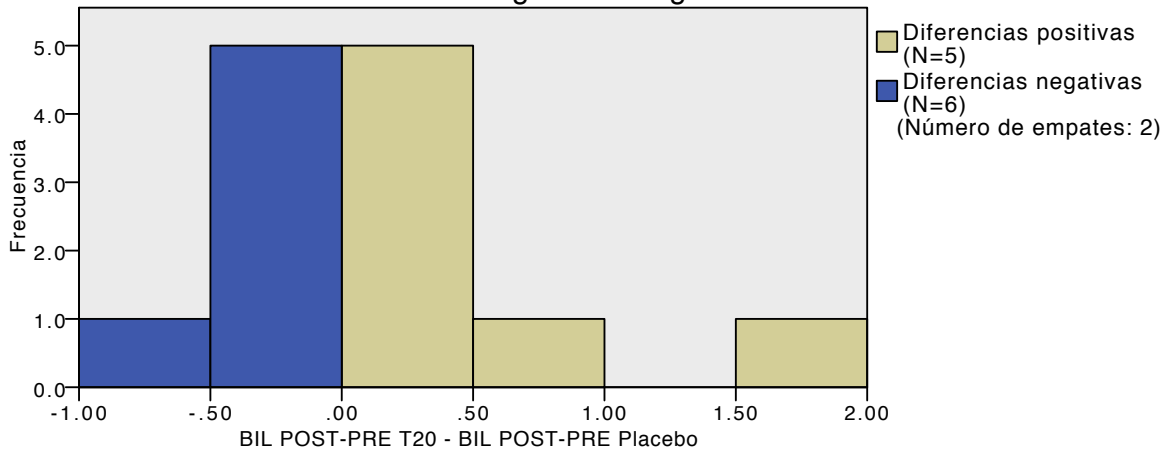

|                                       |        |
|---------------------------------------|--------|
| N total                               | 13     |
| Probar estadística                    | 32.000 |
| Error típico                          | 11.214 |
| Estadística de prueba estandarizada   | -.089  |
| Sig. asintótica (prueba de dos caras) | .929   |



### Información de campo continuo

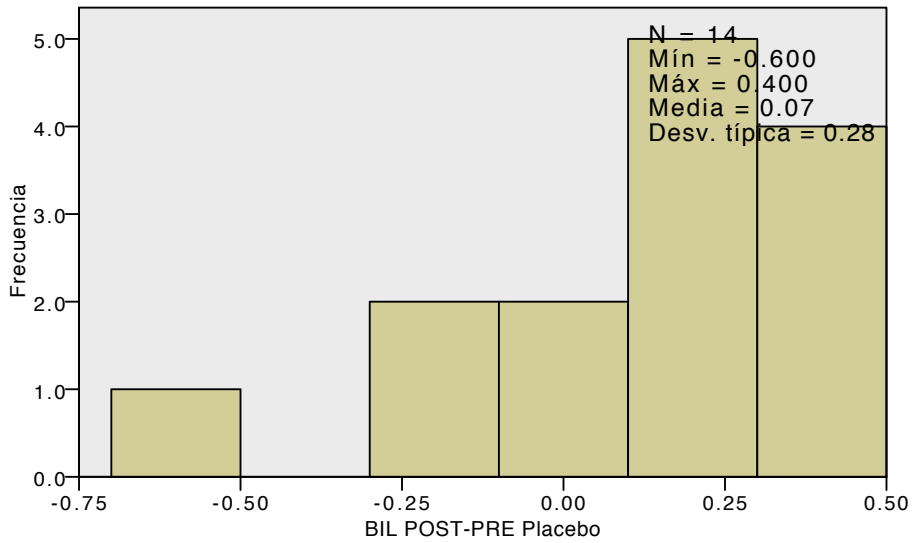

### Información de campo continuo

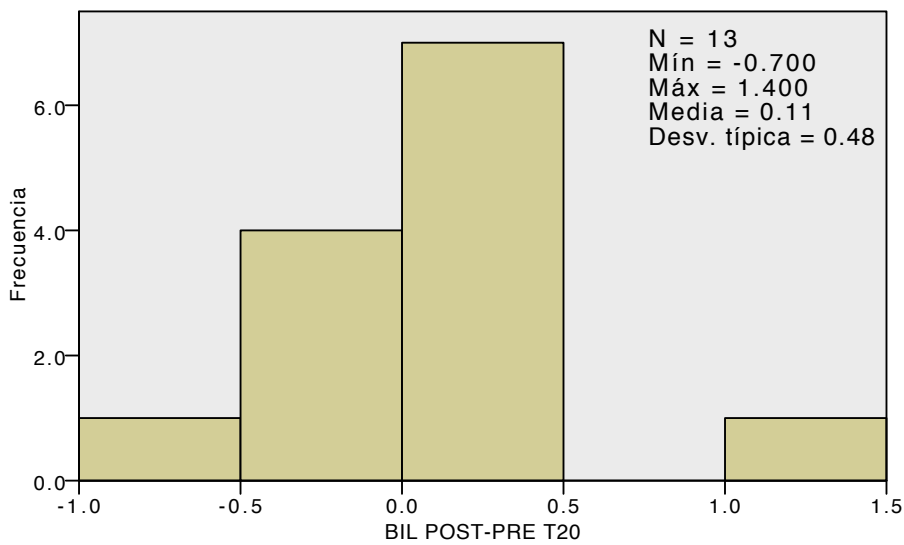

\*Nonparametric Tests: Related Samples.  
NPTESTS  
/RELATED TEST(PROT.DIF.P PROT.DIF.T20) WILCOXON  
/MISSING SCOPE=ANALYSIS USERMISSING=EXCLUDE  
/CRITERIA ALPHA=0.05 CILEVEL=95.

### Pruebas no paramétricas

### Notas

|                           |                                                                                                                                                                |                                                                      |
|---------------------------|----------------------------------------------------------------------------------------------------------------------------------------------------------------|----------------------------------------------------------------------|
| <b>Resultados creados</b> | 23-MAR-2019 18:44:40                                                                                                                                           |                                                                      |
| <b>Comentarios</b>        |                                                                                                                                                                |                                                                      |
| <b>Entrada</b>            | <b>Datos</b>                                                                                                                                                   | /Users/SergioBarroso/Desktop/T20-RAL Reviewers/Base de datos/RAL.sav |
|                           | <b>Conjunto de datos activo</b>                                                                                                                                | Conjunto_de_datos2                                                   |
|                           | <b>Filtro</b>                                                                                                                                                  | <ninguno>                                                            |
|                           | <b>Peso</b>                                                                                                                                                    | <ninguno>                                                            |
|                           | <b>Dividir archivo</b>                                                                                                                                         | <ninguno>                                                            |
|                           | <b>Núm. de filas del archivo de trabajo</b>                                                                                                                    | 14                                                                   |
| <b>Sintaxis</b>           | NPTESTS<br>/RELATED TEST(PROT.<br>DIF.P PROT.DIF.T20)<br>WILCOXON<br>/MISSING<br>SCOPE=ANALYSIS<br>USERMISSING=EXCLUDE<br>/CRITERIA ALPHA=0.<br>05 CILEVEL=95. |                                                                      |
| <b>Recursos</b>           | <b>Tiempo de procesador</b>                                                                                                                                    | 00:00:00.06                                                          |
|                           | <b>Tiempo transcurrido</b>                                                                                                                                     | 00:00:00.00                                                          |

[Conjunto\_de\_datos2] /Users/SergioBarroso/Desktop/T20-RAL Reviewers/Base de datos/RAL.sav

### Resumen de prueba de hipótesis

|   | Hipótesis nula                                                                              | Test                                                                | Sig. | Decisión                   |
|---|---------------------------------------------------------------------------------------------|---------------------------------------------------------------------|------|----------------------------|
| 1 | La mediana de las diferencias entre PROT POST-PRE Placebo y PROT POST-PRE T20 es igual a 0. | Prueba de Wilcoxon de los rangos con signo de muestras relacionadas | .086 | Retener la hipótesis nula. |

Se muestran las significancias asintóticas. El nivel de significancia es .05.

Prueba de Wilcoxon de los rangos con signo de muestras relacionadas

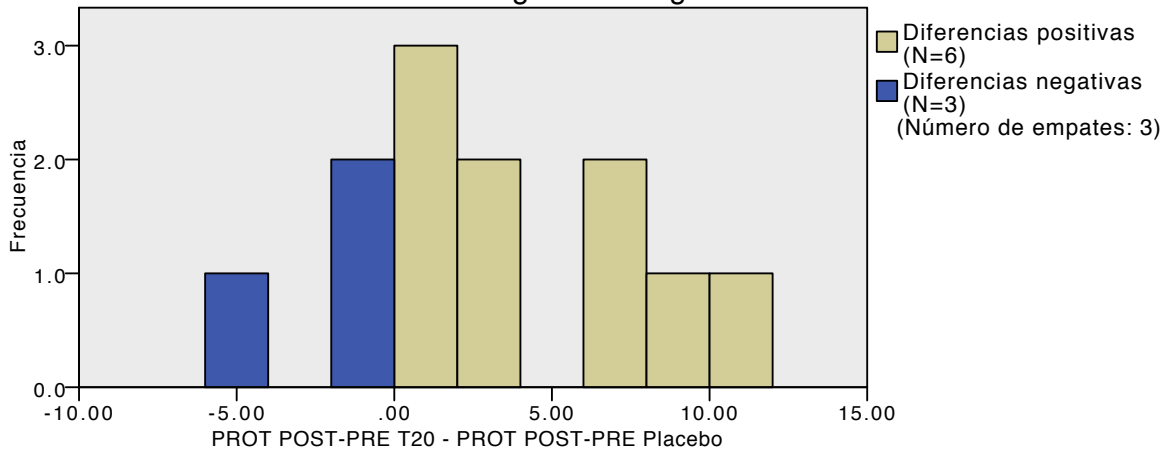

|                                       |        |
|---------------------------------------|--------|
| N total                               | 12     |
| Probar estadística                    | 37.000 |
| Error típico                          | 8.434  |
| Estadística de prueba estandarizada   | 1.719  |
| Sig. asintótica (prueba de dos caras) | .086   |

### Información de campo continuo

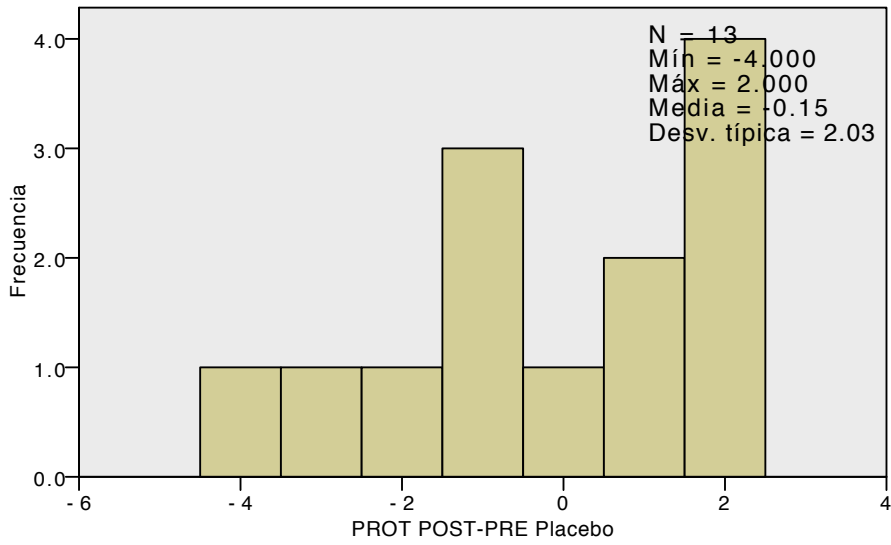

### Información de campo continuo

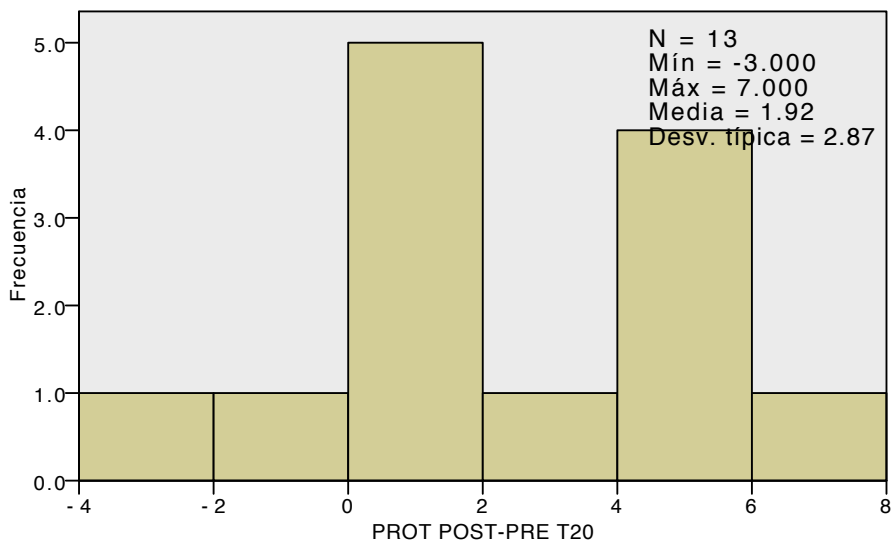

Supplement: pone.0216712.s005.pdf [file pone.0216712.s005.pdf]
